# Supplementary material for: Improving and correcting the contiguity of long-read genome assemblies of three plant species using optical mapping and chromosome conformation capture data
Source: PubMed Central journal article supplement (PMC5411772; doi:10.1101/gr.213652.116), 2017-05
Supplement: supp_gr.213652.116_Supplemental_Methods_Figures.pdf [file supp_gr.213652.116_Supplemental_Methods_Figures.pdf]

Supplemental Material for:

**Improving and correcting the contiguity of long-read genome assemblies of three related plant species using optical mapping and chromatin conformation capture data**

*Jiao et al.*

This pdf includes

Supplemental Material and Methods

Supplemental Figures S1 – S6

Supplemental Tables S1 – S3 and S5 – S13

## **Supplemental Material and Methods**

### **Plant sample preparation**

Plants from all three species were grown on standard soil under greenhouse conditions. The seeds were stratified on soil for two to three days at 4 °C straight after sowing.

For Illumina sequencing, young leaf material from single plants was collected after at least three weeks of plant growth and snap frozen in liquid nitrogen immediately after sampling. DNA was prepared with QIAGEN DNeasy plant mini kit according to the manufacturer's instructions and quality checked on an agarose gel prior to library preparation.

For PacBio sequencing, optical mapping and chromatin capture multiple plants were grown on standard soil. When two to four weeks old plants were covered for two to three days. After dark treatment young leaf tissue was collected and snap frozen immediately in liquid nitrogen.

### **PacBio sequencing**

Genomic DNA was isolated from 500 mg frozen leave tissue with the NucleoSpin Plant II Maxi kit (Macherey-Nagel, Düren, Germany) as recommended. Isolated high molecular weight DNA was quantified by fluorometry (Qubit, Thermo Fisher Scientific, Waltham, U.S.A.) and assessed for quality by 0.8% (w/v) agarose gel electrophoresis or with the genomic assay on the TapeStation (Agilent, Waldbronn, Germany). Single Molecule Real Time (SMRT) bell libraries were prepared according to the "20 kb Template Preparation Using BluePippin Size-Selection System" as recommended by Pacific Biosciences (Palo Alto, U.S.A). After damage-repair the libraries were size-selected on a BluePippin system (0.75% (w/v) agarose gel cassette, dye-free, S1 marker, high pass 6-10 kb vs3 protocol) to remove library fragments smaller than 10kb. Then libraries were recovered by PB AMPure beads, quantified by the high sensitivity fluorometric assay (Qubit, Thermo Fisher Scientific, Waltham, U.S.A.) and quality assessed by DNA12000 assay on a 2100 Bioanalyser (Agilent, Waldbronn, Germany). SMRT bell templates were bound to P6 polymerase using the DNA polymerase binding kit P6 v2 primers. Polymerase-template complexes were bound to magnetic beads using the Magbead Binding Kit and sequencing was carried out on the PacBio RS II sequencer using C4v1 sequencing reagents with movie lengths of 360 min on SMRT cells.

## **Illumina sequencing**

Illumina paired-end library of *E. syriacum* was generated and sequenced on a HiSeq2500 instrument at the Max Planck-Genome centre, Cologne, Germany. Illumina reads of *A. alpina* and *C. planisiliqua* were taken from earlier studies (Willing et al. 2015; Bewick et al. 2016). The paired-end reads were used to estimate heterozygosity levels based on 25-mer frequencies calculated with Jellyfish (Marçais and Kingsford 2011) and genomescope.R (<https://github.com/schatzlab/genomescope>). Mate-pair libraries were constructed, quality controlled by alignment to the constructed contigs, and chosen for sequencing as described earlier (Heavens et al. 2015). Raw reads were pre-processed using a pipeline based on Nextclip (Leggett et al. 2014).

## **Genetic map generation**

An F<sub>2</sub> mapping population containing 389 individuals was obtained from three self-pollinated F<sub>1</sub> hybrids between two *A. alpina* accessions from the French Alps. DNA was extracted from each F<sub>2</sub> plant using the Qiagen DNeasy Plant Mini Kit according to manual. Libraries for genotyping-by-sequencing were prepared and barcoded ApeKI restriction fragments were sequenced at the Genomic Diversity Facility at Cornell University (Ithaca NY, USA) (Elshire et al. 2011).

Sequencing reads starting with the ApeKI recognition site were cleaned with Cutadapt (Martin 2011) and Trimmomatic (Bolger et al. 2014) and then mapped to the genome using BWA (Li and Durbin 2009). Consensus calling was performed with samtools and bcftools (Li et al. 2009) on positions with at least five reads and a quality of 25. Sites were considered as homozygous if the major allele had a frequency of at least 0.9 otherwise the site was labelled as heterozygous. All genotypes that did not match the parental alleles were considered as missing values. A genotype table, containing only markers that were homozygous in both parents, was filtered for individuals that had missing values at more than 80% of initial markers and for markers for which less than 70% of individuals were genotyped or did not have the expected segregation pattern according to a Chi-square test ( $P < 0.0001$ ). The resulting genotypes were used for linkage analysis using JoinMap v4.0. Markers were grouped using Maximum likelihood option at a minimum LOD score of 3.0 and maximum recombination fraction of 0.25 as general linkage criteria to establish linkage groups. Kosambi's function was applied to convert recombination percentages to centiMorgan map unit distances (Kosambi 1943).

## Optical mapping

Earlham Institute's Platforms and Pipelines group followed IrysPrep™ Fix'n'Blend Plant DNA extraction protocol supplied by Bionano Genomics. 2.5 g of fresh young leaves were fixed with 2% formaldehyde. After washing, leaves are disrupted and homogenized in the presence of isolation buffer. The isolation buffer contains PVP10 and BME to prevent oxidation of polyphenols. Triton X-100 is added to facilitate the release of nuclei from the broken cells. The nuclei are then purified on a Percoll cushion. A nuclei phase is taken and washed several times in isolation buffer before embedding into low melting point agarose. Two plugs of 90 µl were cast using the Chef Mammalian Genomic DNA Plug Kit (Bio-Rad 170-3591). Once set at 4° the plugs were added to a lysis solution containing 200 µl proteinase K (QIAGEN 158920) and 2.5ml of Bionano lysis buffer in a 50 ml conical tube. These were put at 50°C for two hours on a thermomixer, making a fresh proteinase K solution to incubate overnight. The 50 ml tubes were then removed from the thermomixer for five minutes before 50 µl RNase A (Qiagen158924) was added and the tubes returned to the thermomixer for a further hour at 37°C. The plugs were then washed seven times in Wash Buffer supplied in Chef kit and seven times in 1xTE. One plug was removed and melted for two minutes at 70°C followed by five minutes at 43°C before adding 10 µl of 0.2 U/µl of GELase (Cambio Ltd G31200). After 45 minutes at 43°C the melted plug was dialysed on a 0.1 µM membrane (Millipore VCWP04700) sitting on 15 ml of 1xTE in a small petri dish. After two hours the sample was removed with a wide bore tip and mixed gently five times and left overnight at 4°C. A small amount was removed to QC on an Opgen Argus Q-Card and Qubit HS for the DNA concentration. 300 ng of DNA was taken into the NLRS (Nick, Label, Repair and Stain) reaction using 1 µl Nt.BspQI (NEB R0644S). Following the NLRS reaction 16 µl was loaded onto a single flow cell on a Bionano chip. The Chip loading was optimised and run for 30 cycles on the Bionano Irys using ICS1.6. The same chip was run a total of five times. Images were converted to .bnx files using AutoDetect 2.1.0.6656 before analysis.

## Estimation of centromeric regions

Using the cytogenetic maps and a whole-genome alignment (using nucmer from MUMmer version 3.23 (Kurtz et al. 2004) using "--mum -l 40 -g 90 -c 90 -b 200") of *A. lyrata* and *A. thaliana* (Schranz et al. 2006) we defined the centromere positions of *A. lyrata* following the centromere positions of *A. thaliana* (Arabidopsis Genome Initiative 2000). The adjacent alignment block of each of the genome alignments of *A. lyrata*

and the three assemblies (again using nucmer parameters “--mum -l 20 -g 90 -c 65 -b 200”) were chained and extended into syntenic blocks. Scaffolds with syntenic blocks corresponding to both flanking sides of a centromere in *A. lyrata* were considered as centromere spanning. While those scaffolds with syntenic blocks corresponding to only one side of *A. lyrata* centromere were considered as partial centromeres. In addition we checked whether the assemblies contained centromeric tandem repeats (Melters et al. 2013), For this we performed de novo prediction of tandem repeat arrays using Tandem Repeat Finder with parameter setting “1 1 2 80 5 200 2000 -h”. The longest tandem arrays were selected and clustered to find the most abundant repeat units, which were defined as the candidate centromeric repeat.

### **Annotating and finalizing the assemblies**

To allow general usage of these assembly resources, we further improved the assembly of *A. alpina* by splitting the remaining erroneous contigs and integrating comparative BAC hybridization data as described earlier (Willing et al. 2015) and annotated genes across all three genomes. For gene annotations of *E. syriacum* and *C. planisiliqua* we aligned the protein coding sequences of eight different Brassicaceae species (*A. thaliana*, *A. lyrata*, *Capsella rubella*, *Brassica rapa*, *Eutrema salsugineum*, *Schrenkiella parvula*, *A. alpina*, *Arabis montbretiana*) (Arabidopsis Genome Initiative 2000; Hu et al. 2011; Slotte et al. 2013; The Brassica rapa Genome Sequencing Project Consortium et al. 2011; Yang et al. 2013; Dassanayake et al. 2011; Willing et al. 2015) to the genomic scaffolds using Scipio (v1.4) (Keller et al. 2008) to obtain homology based gene models. In addition, we used three *ab initio* prediction methods for *de novo* gene finding including GlimmerHMM (v3.0) (Majoros et al. 2004), SNAP (v2013) (Korf 2004) and Augustus (v3.0) (Stanke and Waack 2003). The resulting annotations were combined into weighted consensus gene structures using EVIDENCEModeler (EVM) software (v2012) (Haas et al. 2008). Gene models of an earlier version of the *A. alpina* assembly were used to annotate genes in the new assembly. Genomic scaffolds were annotated for transposable elements using RepeatMasker (v4.0) and a custom Brassicaceae repeat library. Predicted consensus models were removed from the annotation, if their predicted coding sequence overlapped with an annotated TE.

## References

- Arabidopsis Genome Initiative. 2000. Analysis of the genome sequence of the flowering plant *Arabidopsis thaliana*. *Nature* **408**: 796–815.
- Bewick AJ, Ji L, Niederhuth CE, Willing E-M, Hofmeister BT, Shi X, Wang L, Lu Z, Rohr NA, Hartwig B, et al. 2016. On the origin and evolutionary consequences of gene body DNA methylation. *Proc Natl Acad Sci* **113**: 9111–9116.
- Bolger AM, Lohse M, Usadel B. 2014. Trimmomatic: a flexible trimmer for Illumina sequence data. *Bioinformatics* **30**: 2114–2120.
- Dassanayake M, Oh D-H, Haas JS, Hernandez A, Hong H, Ali S, Yun D-J, Bressan RA, Zhu J-K, Bohnert HJ, et al. 2011. The genome of the extremophile crucifer *Thellungiella parvula*. *Nat Genet* **43**: 913–918.
- Elshire RJ, Glaubitz JC, Sun Q, Poland JA, Kawamoto K, Buckler ES, Mitchell SE. 2011. A Robust, Simple Genotyping-by-Sequencing (GBS) Approach for High Diversity Species. *PLOS ONE* **6**: e19379.
- Haas BJ, Salzberg SL, Zhu W, Pertea M, Allen JE, Orvis J, White O, Buell CR, Wortman JR. 2008. Automated eukaryotic gene structure annotation using EvidenceModeler and the Program to Assemble Spliced Alignments. *Genome Biol* **9**: R7.
- Heavens D, Accinelli GG, Clavijo B, Clark MD. 2015. A method to simultaneously construct up to 12 differently sized Illumina Nextera long mate pair libraries with reduced DNA input, time, and cost. *BioTechniques* **59**: 42–45.
- Hu TT, Pattyn P, Bakker EG, Cao J, Cheng J-F, Clark RM, Fahlgren N, Fawcett JA, Grimwood J, Gundlach H, et al. 2011. The *Arabidopsis lyrata* genome sequence and the basis of rapid genome size change. *Nat Genet* **43**: 476–481.
- Keller O, Odronitz F, Stanke M, Kollmar M, Waack S. 2008. Scipio: Using protein sequences to determine the precise exon/intron structures of genes and their orthologs in closely related species. *BMC Bioinformatics* **9**: 278.
- Korf I. 2004. Gene finding in novel genomes. *BMC Bioinformatics* **5**: 59.
- Kosambi DD. 1943. The Estimation of Map Distances from Recombination Values. *Ann Eugen* **12**: 172–175.
- Kurtz S, Phillippy A, Delcher AL, Smoot M, Shumway M, Antonescu C, Salzberg SL. 2004. Versatile and open software for comparing large genomes. *Genome Biol* **5**: R12.
- Leggett RM, Clavijo BJ, Clissold L, Clark MD, Caccamo M. 2014. NextClip: an analysis and read preparation tool for Nextera Long Mate Pair libraries. *Bioinforma Oxf Engl* **30**: 566–568.
- Li H, Durbin R. 2009. Fast and accurate short read alignment with Burrows-Wheeler transform. *Bioinformatics* **25**: 1754–1760.

- Li H, Handsaker B, Wysoker A, Fennell T, Ruan J, Homer N, Marth G, Abecasis G, Durbin R, 1000 Genome Project Data Processing Subgroup. 2009. The Sequence Alignment/Map format and SAMtools. *Bioinformatics* **25**: 2078–2079.
- Majoros WH, Pertea M, Salzberg SL. 2004. TigrScan and GlimmerHMM: two open source ab initio eukaryotic gene-finders. *Bioinformatics* **20**: 2878–2879.
- Marçais G, Kingsford C. 2011. A fast, lock-free approach for efficient parallel counting of occurrences of k-mers. *Bioinformatics* **27**: 764–770.
- Martin M. 2011. Cutadapt removes adapter sequences from high-throughput sequencing reads. *EMBnet.journal* **17**: 10–12.
- Melters DP, Bradnam KR, Young HA, Telis N, May MR, Ruby JG, Sebra R, Peluso P, Eid J, Rank D, et al. 2013. Comparative analysis of tandem repeats from hundreds of species reveals unique insights into centromere evolution. *Genome Biol* **14**: R10.
- Schranz ME, Lysak MA, Mitchell-Olds T. 2006. The ABC's of comparative genomics in the Brassicaceae: building blocks of crucifer genomes. *Trends Plant Sci* **11**: 535–542.
- Slotte T, Hazzouri KM, Ågren JA, Koenig D, Maumus F, Guo Y-L, Steige K, Platts AE, Escobar JS, Newman LK, et al. 2013. The *Capsella rubella* genome and the genomic consequences of rapid mating system evolution. *Nat Genet* **45**: 831–835.
- Stanke M, Waack S. 2003. Gene prediction with a hidden Markov model and a new intron submodel. *Bioinformatics* **19**: ii215–ii225.
- The Brassica rapa Genome Sequencing Project Consortium, Wang X, Wang H, Wang J, Sun R, Wu J, Liu S, Bai Y, Mun J-H, Bancroft I, et al. 2011. The genome of the mesopolyploid crop species *Brassica rapa*. *Nat Genet* **43**: 1035–1039.
- Willing E-M, Rawat V, Mandáková T, Maumus F, James GV, Nordström KJV, Becker C, Warthmann N, Chica C, Szarzynska B, et al. 2015. Genome expansion of *Arabis alpina* linked with retrotransposition and reduced symmetric DNA methylation. *Nat Plants* **1**: 14023.
- Yang R, Jarvis DE, Chen H, Beilstein MA, Grimwood J, Jenkins J, Shu S, Prochnik S, Xin M, Ma C, et al. 2013. The Reference Genome of the Halophytic Plant *Eutrema salsugineum*. *Front Plant Sci* **4**: 46.

## Supplemental figures

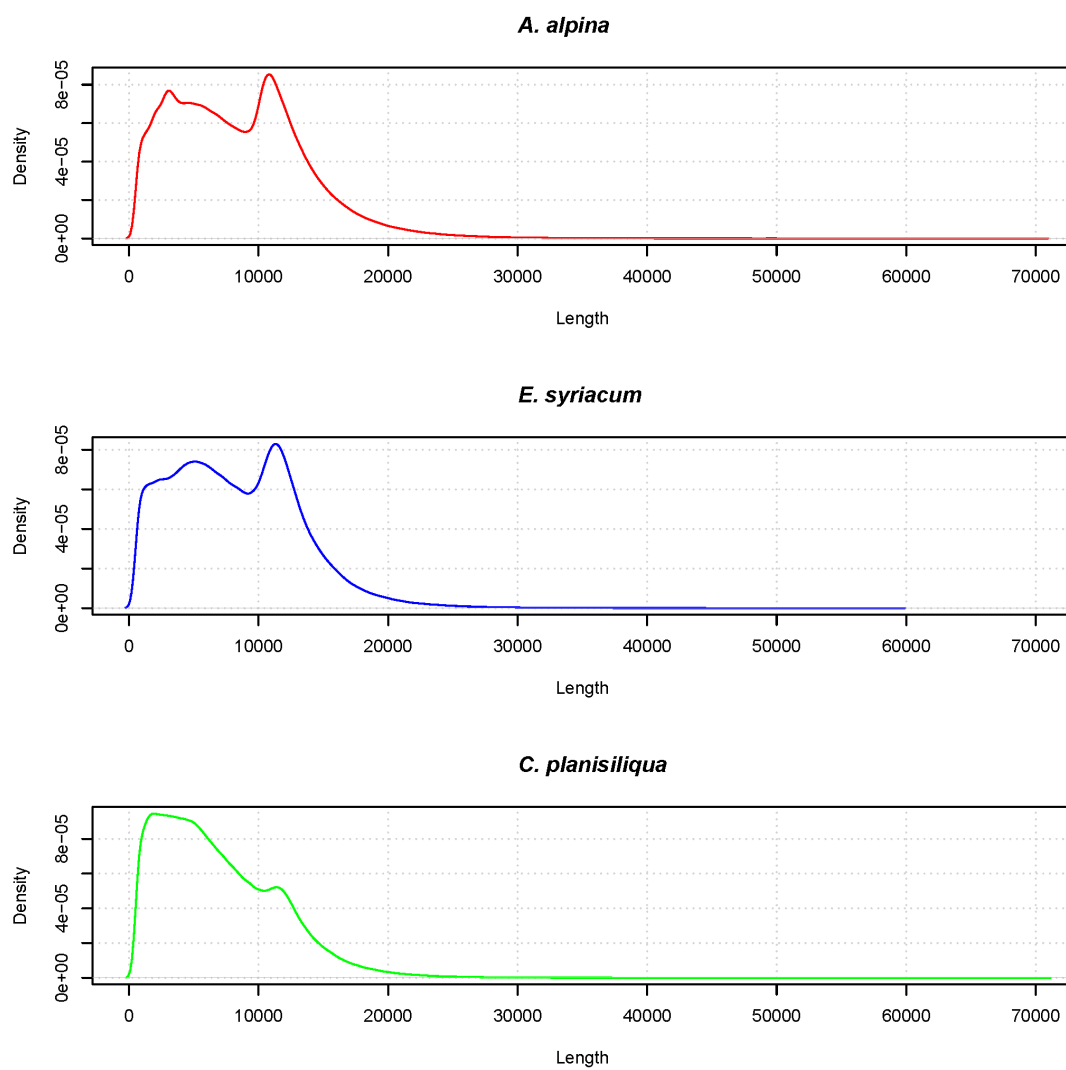

**Figure S1.** Length distribution of PacBio filtered subreads for the three genomes.



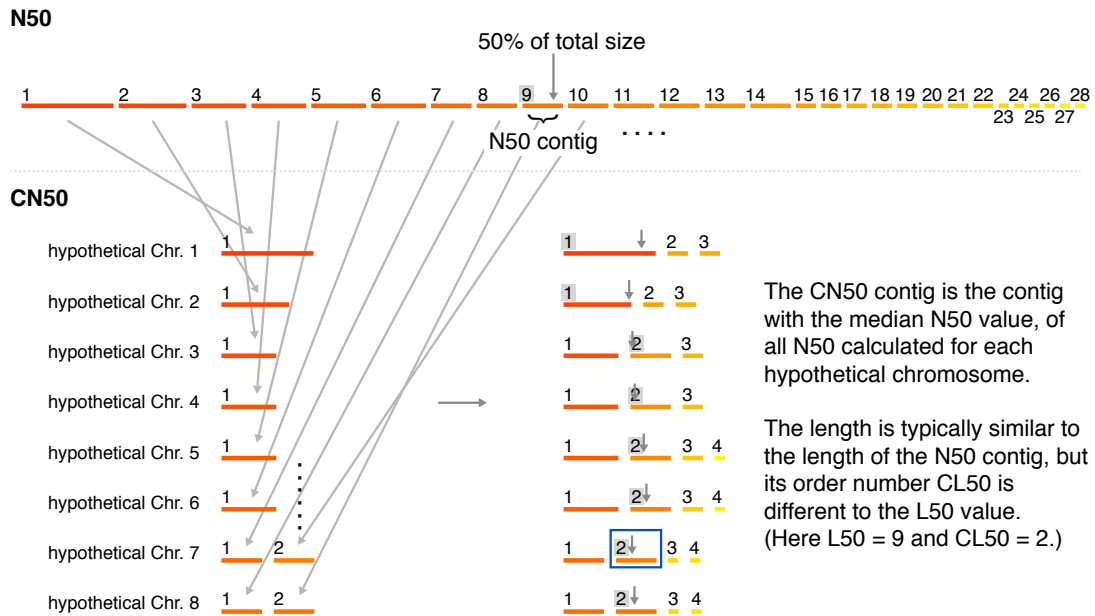

**Figure S2. Definition of CN50 and CL50 statistics.** N50 and L50 refer to one particular contig of a sequence assembly. This contig along with all longer contigs make up more than 50% of the total assembly size. The length of this contig is given by the N50 value, whereas its order number (in an ordering where contigs are sorted by length) is given as L50 (though some people prefer to annotate it vice versa). However, even in perfect assemblies, the L50 is not 1 (as it optimally would be), as the number of chromosomes limits the L50 value. This effect is marginal if an assembly consists of many contigs, however, in assemblies with high contiguity, this effect can be drastic and interfere with the interpretation of the L50 value.

CN50 and CL50 normalize the N50 statistics for chromosome number ( $n$ ). For this, the contigs are sorted to hypothetical chromosomes, where the first chromosome is assigned the longest contig, the second chromosome the second longest and so on. The  $n+1$  longest contig is then assigned to the  $n$ -th chromosome again (in the above example contig #9 is assigned to hypothetical chromosome 8) and the  $n+2$  longest contig is assigned to chromosome  $n-2$  (here contig #10 is assigned to chromosome 7), until no more contigs are left. For each of the  $n$  contig sets N50 is calculated and the median of these values describes the CN50 value. The order number (L50) of the respective CN50 contig (shown in the blue box) in the hypothetical chromosome finally describes the CL50 value.

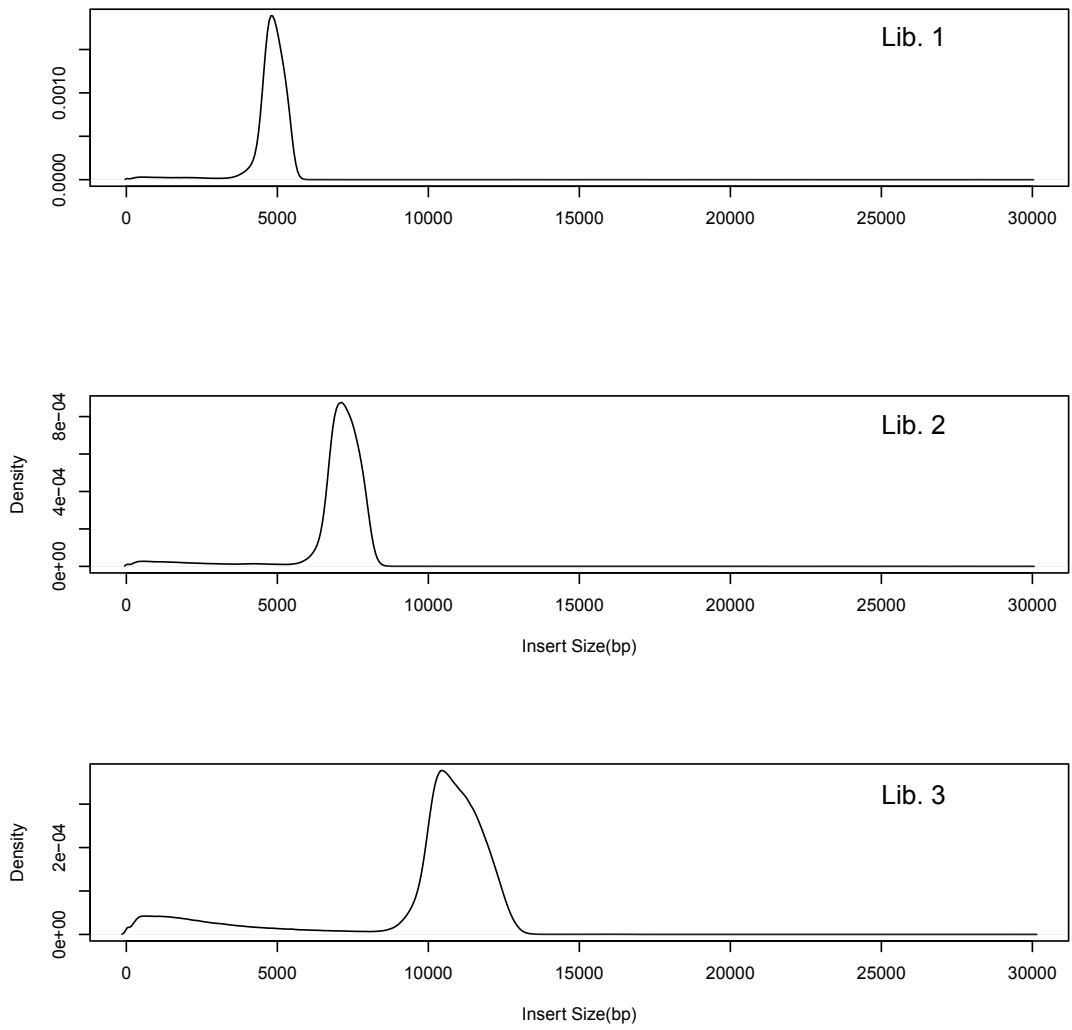

**Figure S3.** Insert size density distribution of the three mate-pair libraries generated for *A. alpina*.

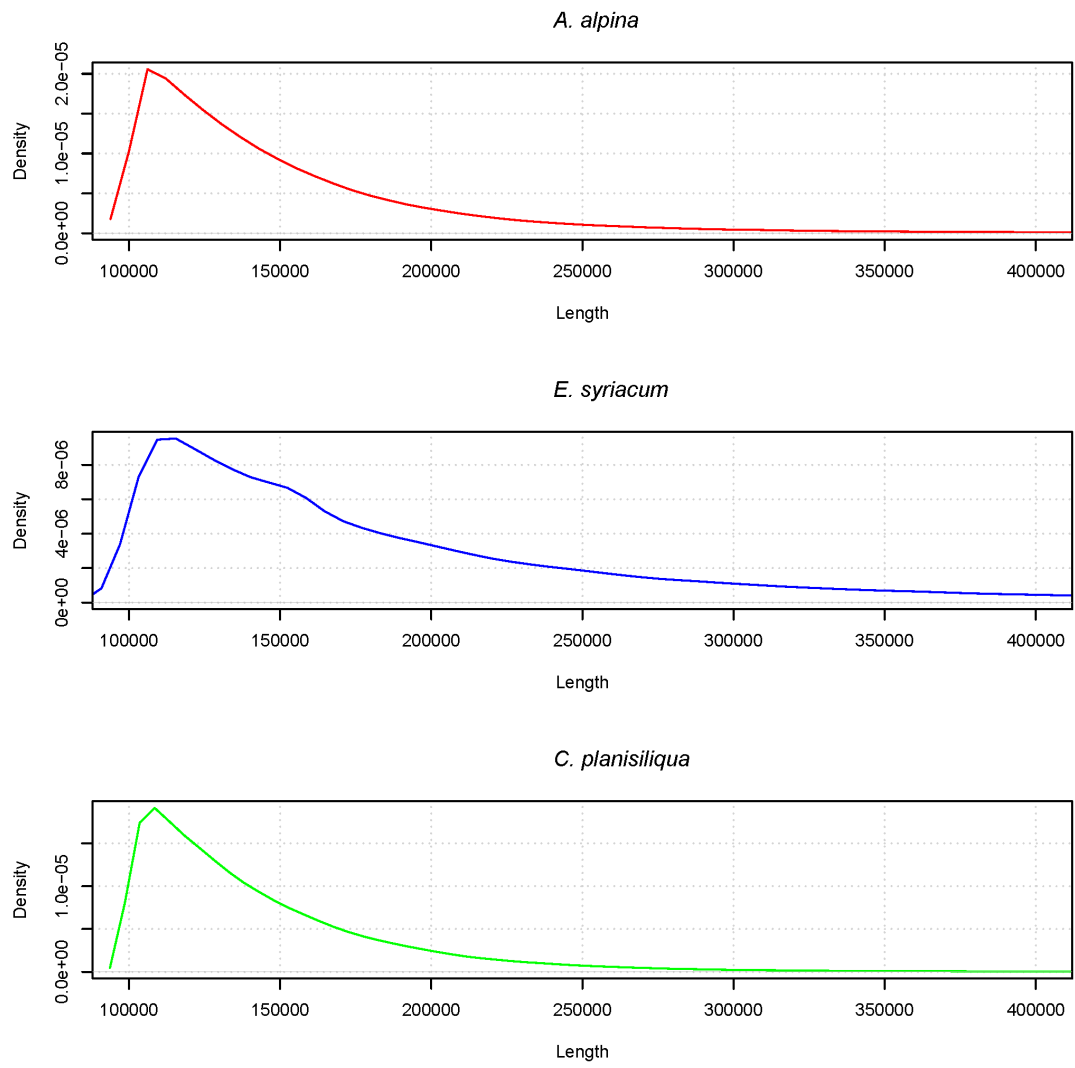

**Figure S4.** Length distribution of optical mapping molecules for the three genomes.

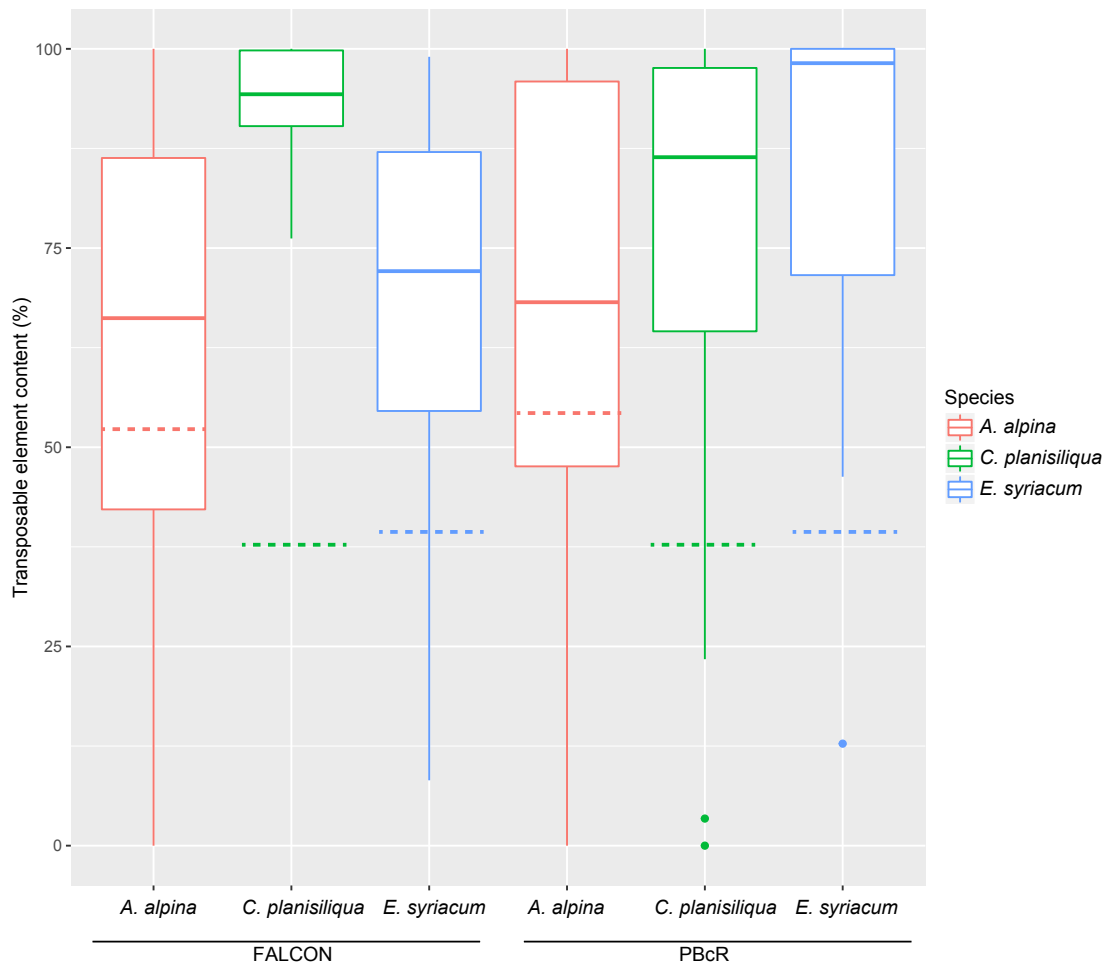

**Figure S5.** Distribution of transposable element content (%) in misassembled regions in the six initial assemblies (three species, two assembly tools) as compared to the average TE content density across the assembly (indicated with dashed lines).

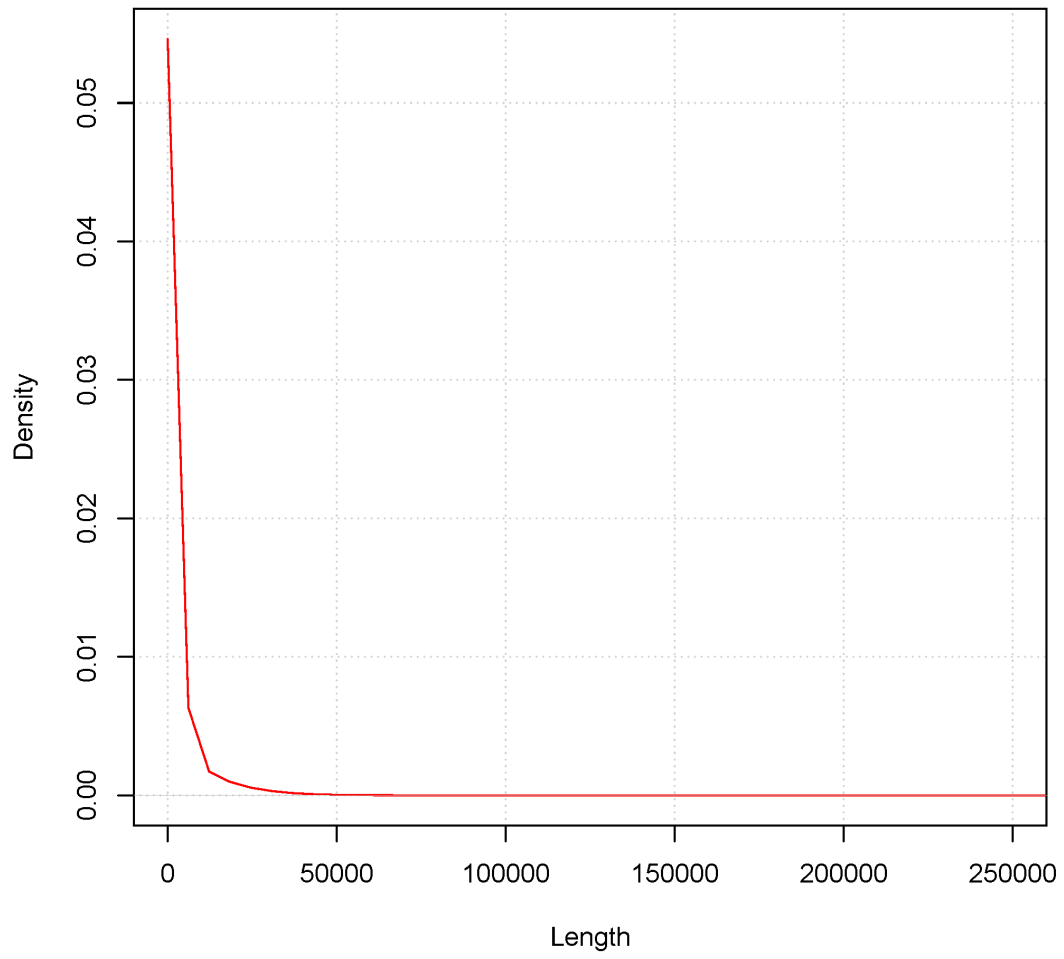

**Figure S6.** Insert size distribution of the Dovetail Genomics data of *A. alpina*.

## Supplemental tables

**Table S1.** PacBio raw polymerase reads and filtered subreads statistics.

|                  | <i>A. alpina</i> |          | <i>E. syriacum</i> |          | <i>C. planisiliqua</i> |          |
|------------------|------------------|----------|--------------------|----------|------------------------|----------|
|                  | raw reads        | subreads | raw reads          | subreads | raw reads              | subreads |
| SMRT Cells       | 35               | 35       | 30                 | 30       | 18                     | 18       |
| Total bases (Gb) | 38.4             | 32.1     | 14.7               | 12.3     | 12.7                   | 12       |
| Total number (M) | 5.3              | 3.8      | 4.5                | 1.8      | 2.7                    | 1.5      |
| Length N50 (kb)  | 18.7             | 11.3     | 10.4               | 10.8     | 14.5                   | 11.1     |
| Length mean (kb) | 7.3              | 8.5      | 3.3                | 6.9      | 4.7                    | 7.9      |
| Coverage         | 102.3            | 85.5     | 55.6               | 46.6     | 56.6                   | 53.5     |

**Table S2.** PacBio assembly nucleotide-level accuracy estimation.

|            | <i>A. alpina</i> |         | <i>E. syriacum</i> |         | <i>C. planisiliqua</i> |         |
|------------|------------------|---------|--------------------|---------|------------------------|---------|
|            | Falcon           | PBcR    | Falcon             | PBcR    | Falcon                 | PBcR    |
| Mismatch   | 580              | 468     | 275                | 603     | 1,429                  | 624     |
| Indel      | 3,479            | 2,312   | 9,274              | 9,631   | 9,945                  | 4,640   |
| Error rate | 0.0012%          | 0.0008% | 0.0042%            | 0.0045% | 0.0065%                | 0.0031% |

**Table S3.** Mate-pair library read statistics.

|                  | reads      | mapped reads |       | mapped pairs |       | inter-contig pairs |       |
|------------------|------------|--------------|-------|--------------|-------|--------------------|-------|
|                  |            | Falcon       | PBcR  | Falcon       | PBcR  | Falcon             | PBcR  |
| Lib. 1<br>(5 kb) | 50,804,106 | 91.7%        | 94.2% | 86.3%        | 89.7% | 19.6%              | 23.9% |
| Lib. 2<br>(7 kb) | 50,138,688 | 90.3%        | 92.7% | 83.6%        | 86.9% | 20.4%              | 24.3% |
| Lib. 3<br>(10kb) | 26,492,772 | 87.0%        | 89.5% | 77.3%        | 81.0% | 20.5%              | 24.5% |

Inter-contig pairs: read pairs mapped on different contigs

**Table S4.** Marker sequences of the *A. alpina* mapping population.

Shown in additional file.

**Table S5.** Optical mapping data and consensus map statistics.

|                        | Number of maps | Avg. map length(kb) | Coverage | Assembly size(Mb) | N50(kb) | L50 | Nick sites / 100kb |
|------------------------|----------------|---------------------|----------|-------------------|---------|-----|--------------------|
| <i>A. alpina</i>       | 1,729,537      | 157                 | 722      | 322.8             | 624.6   | 166 | 9.6                |
| <i>E. syriacum</i>     | 810,303        | 145                 | 446      | 233.8             | 924.3   | 77  | 11.2               |
| <i>C. planisiliqua</i> | 461,383        | 200                 | 410      | 199.7             | 1,474.2 | 41  | 12.3               |

**Table S6.** Consensus map (c-map) alignment statistics.

|                           | <i>A. alpina</i> |      | <i>E. syriacum</i> |      | <i>C. planisiliqua</i> |      |
|---------------------------|------------------|------|--------------------|------|------------------------|------|
|                           | Falcon           | PBcR | Falcon             | PBcR | Falcon                 | PBcR |
| Aligned c-map number      | 601              | 604  | 318                | 315  | 156                    | 152  |
| Aligned c-map length (%)  | 97.3             | 97.7 | 97.5               | 97.1 | 90.1                   | 89.2 |
| Covered c-map length (%)  | 85.0             | 87.6 | 94.0               | 89.3 | 82.3                   | 77.3 |
| Aligned contig number     | 495              | 446  | 140                | 430  | 151                    | 262  |
| Aligned contig length (%) | 91.2             | 87.2 | 98.8               | 93.8 | 92.8                   | 89.8 |
| Covered contig length (%) | 77.9             | 75.8 | 94.1               | 87.5 | 89.7                   | 85.7 |

Aligned c-map/contig length: the total length of consensus maps/contigs, which can be aligned by contigs/consensus maps. Covered c-maps/contigs length: the total length of consensus map/contig regions, which were covered by contigs/consensus maps.

**Table S7.** Misassembled regions are enriched for transposable elements (TEs). Misassemblies include all conflicting regions between optical mapping data and sequence contigs. TE-rich column describes how many of the misassembled regions harbor more TEs than the genome average.

| Species                | Assembler     | Misassemblies | TE-rich         |
|------------------------|---------------|---------------|-----------------|
| <i>A. alpina</i>       | Falcon        | 63            | 43 (68%)        |
| <i>A. alpina</i>       | PBcR          | 47            | 36 (77%)        |
| <i>C. planisiliqua</i> | Falcon        | 15            | 15 (100%)       |
| <i>C. planisiliqua</i> | PBcR          | 23            | 20 (87%)        |
| <i>E. syriacum</i>     | Falcon        | 7             | 6 (86%)         |
| <i>E. syriacum</i>     | PBcR          | 35            | 34 (97%)        |
| <b>Sum</b>             | <b>Falcon</b> | <b>85</b>     | <b>64 (75%)</b> |
| <b>Sum</b>             | <b>PBcR</b>   | <b>105</b>    | <b>90 (86%)</b> |



**Table S8.** Location of rDNA and centromeric repeat arrays.

| <b>species</b>         | <b>scaffold</b> | <b>scaffold length</b> | <b>array start</b> | <b>array end</b> | <b>unit number</b> | <b>unit length</b> | <b>type</b> |
|------------------------|-----------------|------------------------|--------------------|------------------|--------------------|--------------------|-------------|
| <i>A. alpina</i>       | scaffold_113    | 318,510                | 3,526              | 69,721           | 114                | 119                | 5S          |
| <i>A. alpina</i>       | scaffold_397    | 24,131                 | 45                 | 23,774           | 49                 | 119                | 5S          |
| <i>A. alpina</i>       | scaffold_443    | 21,612                 | 206                | 21,553           | 42                 | 119                | 5S          |
| <i>A. alpina</i>       | scaffold_648    | 15,052                 | 168                | 14,847           | 31                 | 119                | 5S          |
| <i>A. alpina</i>       | scaffold_364    | 26,159                 | 395                | 25,761           | 22                 | 119                | 5S          |
| <i>A. alpina</i>       | scaffold_358    | 26,695                 | 338                | 26,560           | 19                 | 119                | 5S          |
| <i>A. alpina</i>       | scaffold_838    | 9,551                  | 495                | 9,402            | 19                 | 119                | 5S          |
| <i>A. alpina</i>       | scaffold_867    | 8,656                  | 373                | 8,463            | 18                 | 119                | 5S          |
| <i>A. alpina</i>       | scaffold_935    | 7,005                  | 139                | 6,807            | 14                 | 119                | 5S          |
| <i>A. alpina</i>       | scaffold_958    | 6,069                  | 31                 | 5,611            | 12                 | 119                | 5S          |
| <i>A. alpina</i>       | scaffold_986    | 5,253                  | 172                | 5,200            | 11                 | 119                | 5S          |
| <i>A. alpina</i>       | scaffold_1023   | 4,275                  | 29                 | 4,066            | 9                  | 119                | 5S          |
| <i>A. alpina</i>       | scaffold_15_1   | 1,417,828              | 1,960              | 56,842           | 6                  | 5,350              | NOR         |
| <i>A. alpina</i>       | scaffold_310    | 31,895                 | 5,871              | 19,752           | 2.3                | 5,350              | NOR         |
| <i>A. alpina</i>       | scaffold_474    | 20,252                 | 2,662              | 19,196           | 2                  | 5,350              | NOR         |
| <i>A. alpina</i>       | scaffold_740    | 12,257                 | 2,269              | 12,244           | 2                  | 5,350              | NOR         |
| <i>C. planisiliqua</i> | scaffold_309    | 16,420                 | 230                | 16,255           | 32                 | 119                | 5S          |
| <i>C. planisiliqua</i> | scaffold_18     | 3,088,089              | 3,078,359          | 3,087,683        | 19                 | 119                | 5S          |
| <i>C. planisiliqua</i> | scaffold_55     | 94,367                 | 7,779              | 93,989           | 10                 | 5,353              | NOR         |

|                        |              |           |           |           |      |       |      |
|------------------------|--------------|-----------|-----------|-----------|------|-------|------|
| <i>C. planisiliqua</i> | scaffold_107 | 45,594    | 1,302     | 44,719    | 5.7  | 5,353 | NOR  |
| <i>C. planisiliqua</i> | scaffold_186 | 26,997    | 746       | 26,982    | 3.3  | 5,353 | NOR  |
| <i>C. planisiliqua</i> | scaffold_276 | 18,011    | 213       | 17,658    | 2.7  | 5,353 | NOR  |
| <i>C. planisiliqua</i> | scaffold_319 | 15,920    | 1,422     | 15,260    | 2    | 5,353 | NOR  |
| <i>E. syriacum</i>     | scaffold_89  | 15,746    | 25        | 15,694    | 34   | 119   | 5S   |
| <i>E. syriacum</i>     | scaffold_92  | 15,505    | 170       | 15,132    | 32   | 119   | 5S   |
| <i>E. syriacum</i>     | scaffold_10  | 9,524,166 | 4,937,560 | 4,998,160 | 7.3  | 5,352 | NOR  |
| <i>A. alpina</i>       | scaffold_5   | 8,313,247 | 8,311,056 | 8,313,247 | 4.4  | 495   | CENT |
| <i>A. alpina</i>       | scaffold_9   | 7,192,857 | 7,119,231 | 7,121,434 | 2.2  | 992   | CENT |
| <i>A. alpina</i>       | scaffold_9   | 7,192,857 | 7,165,320 | 7,192,857 | 55.3 | 509   | CENT |
| <i>A. alpina</i>       | scaffold_9   | 7,192,857 | 7,172,465 | 7,192,857 | 41.3 | 495   | CENT |
| <i>A. alpina</i>       | scaffold_38  | 3,081,905 | 3,019,109 | 3,020,774 | 3.4  | 495   | CENT |
| <i>A. alpina</i>       | scaffold_45  | 2,631,477 | 1         | 11,579    | 11.7 | 992   | CENT |
| <i>A. alpina</i>       | scaffold_56  | 1,882,626 | 1         | 1,253     | 2.5  | 495   | CENT |
| <i>A. alpina</i>       | scaffold_56  | 1,882,626 | 17,725    | 19,905    | 4.4  | 496   | CENT |
| <i>A. alpina</i>       | scaffold_56  | 1,882,626 | 45,692    | 48,362    | 2.7  | 990   | CENT |
| <i>A. alpina</i>       | scaffold_76  | 977,799   | 958,286   | 960,453   | 4.4  | 496   | CENT |
| <i>A. alpina</i>       | scaffold_91  | 632,066   | 26,864    | 31,481    | 4.7  | 990   | CENT |
| <i>A. alpina</i>       | scaffold_91  | 632,066   | 67,829    | 69,937    | 2.1  | 992   | CENT |
| <i>A. alpina</i>       | scaffold_91  | 632,066   | 89,451    | 91,919    | 4.9  | 496   | CENT |
| <i>A. alpina</i>       | scaffold_91  | 632,066   | 137,083   | 139,689   | 2.6  | 990   | CENT |
| <i>A. alpina</i>       | scaffold_91  | 632,066   | 148,864   | 149,954   | 2.2  | 494   | CENT |

|                  |              |         |         |         |      |     |      |
|------------------|--------------|---------|---------|---------|------|-----|------|
| <i>A. alpina</i> | scaffold_91  | 632,066 | 198,453 | 200,567 | 4.3  | 496 | CENT |
| <i>A. alpina</i> | scaffold_91  | 632,066 | 206,431 | 209,096 | 5.4  | 496 | CENT |
| <i>A. alpina</i> | scaffold_91  | 632,066 | 214,409 | 217,369 | 6.0  | 496 | CENT |
| <i>A. alpina</i> | scaffold_91  | 632,066 | 228,424 | 229,525 | 2.2  | 495 | CENT |
| <i>A. alpina</i> | scaffold_91  | 632,066 | 275,256 | 276,293 | 2.1  | 495 | CENT |
| <i>A. alpina</i> | scaffold_91  | 632,066 | 300,707 | 301,921 | 2.5  | 495 | CENT |
| <i>A. alpina</i> | scaffold_91  | 632,066 | 317,899 | 320,453 | 2.6  | 992 | CENT |
| <i>A. alpina</i> | scaffold_91  | 632,066 | 325,857 | 327,338 | 3.0  | 495 | CENT |
| <i>A. alpina</i> | scaffold_91  | 632,066 | 350,460 | 352,447 | 4.0  | 496 | CENT |
| <i>A. alpina</i> | scaffold_91  | 632,066 | 369,166 | 371,648 | 5.0  | 496 | CENT |
| <i>A. alpina</i> | scaffold_91  | 632,066 | 400,514 | 407,036 | 6.6  | 992 | CENT |
| <i>A. alpina</i> | scaffold_91  | 632,066 | 441,588 | 448,065 | 13.1 | 496 | CENT |
| <i>A. alpina</i> | scaffold_91  | 632,066 | 487,579 | 490,436 | 5.8  | 495 | CENT |
| <i>A. alpina</i> | scaffold_91  | 632,066 | 527,132 | 529,024 | 3.8  | 496 | CENT |
| <i>A. alpina</i> | scaffold_91  | 632,066 | 540,161 | 541,320 | 2.3  | 495 | CENT |
| <i>A. alpina</i> | scaffold_91  | 632,066 | 552,453 | 553,501 | 2.1  | 495 | CENT |
| <i>A. alpina</i> | scaffold_91  | 632,066 | 564,545 | 565,927 | 2.8  | 496 | CENT |
| <i>A. alpina</i> | scaffold_91  | 632,066 | 604,422 | 608,152 | 3.8  | 990 | CENT |
| <i>A. alpina</i> | scaffold_95  | 568,052 | 547,850 | 550,320 | 5.0  | 496 | CENT |
| <i>A. alpina</i> | scaffold_95  | 568,052 | 556,005 | 557,812 | 3.6  | 496 | CENT |
| <i>A. alpina</i> | scaffold_95  | 568,052 | 558,740 | 566,921 | 16.6 | 494 | CENT |
| <i>A. alpina</i> | scaffold_104 | 448,397 | 345,740 | 346,823 | 2.2  | 494 | CENT |

|                        |              |            |            |            |      |       |      |
|------------------------|--------------|------------|------------|------------|------|-------|------|
| <i>A. alpina</i>       | scaffold_104 | 448,397    | 372,076    | 374,246    | 4.4  | 497   | CENT |
| <i>A. alpina</i>       | scaffold_104 | 448,397    | 399,500    | 400,687    | 2.4  | 497   | CENT |
| <i>A. alpina</i>       | scaffold_104 | 448,397    | 442,174    | 443,663    | 3.0  | 493   | CENT |
| <i>A. alpina</i>       | scaffold_109 | 359,092    | 420        | 3,045      | 5.3  | 493   | CENT |
| <i>A. alpina</i>       | scaffold_109 | 359,092    | 8,217      | 13,055     | 4.9  | 989   | CENT |
| <i>C. planisiliqua</i> | scaffold_1   | 15,208,799 | 10,089,605 | 10,090,827 | 5.5  | 221   | CENT |
| <i>C. planisiliqua</i> | scaffold_1   | 15,208,799 | 10,113,773 | 10,116,480 | 2.6  | 1,059 | CENT |
| <i>C. planisiliqua</i> | scaffold_1   | 15,208,799 | 10,182,906 | 10,183,676 | 3.5  | 221   | CENT |
| <i>C. planisiliqua</i> | scaffold_1   | 15,208,799 | 10,202,604 | 10,204,237 | 3.7  | 441   | CENT |
| <i>C. planisiliqua</i> | scaffold_1   | 15,208,799 | 10,215,506 | 10,218,151 | 6.0  | 442   | CENT |
| <i>C. planisiliqua</i> | scaffold_1   | 15,208,799 | 10,234,820 | 10,236,456 | 7.4  | 221   | CENT |
| <i>C. planisiliqua</i> | scaffold_1   | 15,208,799 | 10,813,225 | 10,814,534 | 6.0  | 221   | CENT |
| <i>C. planisiliqua</i> | scaffold_1   | 15,208,799 | 15,178,432 | 15,182,366 | 17.8 | 221   | CENT |
| <i>C. planisiliqua</i> | scaffold_3   | 12,074,320 | 12,072,687 | 12,074,320 | 7.4  | 221   | CENT |
| <i>C. planisiliqua</i> | scaffold_4   | 11,819,561 | 10,876,803 | 10,879,849 | 6.9  | 442   | CENT |
| <i>C. planisiliqua</i> | scaffold_4   | 11,819,561 | 10,898,921 | 10,901,008 | 9.5  | 221   | CENT |
| <i>C. planisiliqua</i> | scaffold_4   | 11,819,561 | 11,786,835 | 11,788,801 | 8.9  | 221   | CENT |
| <i>C. planisiliqua</i> | scaffold_4   | 11,819,561 | 11,795,725 | 11,798,056 | 3.5  | 663   | CENT |
| <i>C. planisiliqua</i> | scaffold_4   | 11,819,561 | 11,816,473 | 11,817,406 | 4.2  | 221   | CENT |
| <i>C. planisiliqua</i> | scaffold_5   | 11,279,646 | 10,044,908 | 10,048,569 | 16.6 | 221   | CENT |
| <i>C. planisiliqua</i> | scaffold_6   | 10,977,244 | 6,616,706  | 6,618,339  | 3.7  | 444   | CENT |
| <i>C. planisiliqua</i> | scaffold_6   | 10,977,244 | 6,637,799  | 6,652,393  | 65.8 | 223   | CENT |

|                        |             |            |            |            |       |       |      |
|------------------------|-------------|------------|------------|------------|-------|-------|------|
| <i>C. planisiliqua</i> | scaffold_6  | 10,977,244 | 6,662,541  | 6,665,249  | 12.3  | 221   | CENT |
| <i>C. planisiliqua</i> | scaffold_6  | 10,977,244 | 7,771,294  | 7,772,850  | 2.3   | 665   | CENT |
| <i>C. planisiliqua</i> | scaffold_6  | 10,977,244 | 10,951,673 | 10,977,244 | 116.4 | 221   | CENT |
| <i>C. planisiliqua</i> | scaffold_12 | 6,996,948  | 6,985,637  | 6,989,964  | 19.5  | 221   | CENT |
| <i>C. planisiliqua</i> | scaffold_12 | 6,996,948  | 6,994,638  | 6,996,948  | 3.5   | 662   | CENT |
| <i>C. planisiliqua</i> | scaffold_14 | 5,442,335  | 22,323     | 25,214     | 13.1  | 221   | CENT |
| <i>C. planisiliqua</i> | scaffold_14 | 5,442,335  | 50,727     | 51,662     | 2.1   | 441   | CENT |
| <i>C. planisiliqua</i> | scaffold_14 | 5,442,335  | 3,457,147  | 3,458,221  | 4.9   | 220   | CENT |
| <i>C. planisiliqua</i> | scaffold_17 | 3,665,691  | 3,662,919  | 3,665,691  | 4.2   | 663   | CENT |
| <i>C. planisiliqua</i> | scaffold_18 | 3,088,089  | 545        | 2,783      | 5.1   | 439   | CENT |
| <i>C. planisiliqua</i> | scaffold_18 | 3,088,089  | 3,127      | 7,527      | 20.1  | 220   | CENT |
| <i>C. planisiliqua</i> | scaffold_18 | 3,088,089  | 11,140     | 12,990     | 8.4   | 221   | CENT |
| <i>C. planisiliqua</i> | scaffold_21 | 1,970,407  | 1          | 25,718     | 38.9  | 662   | CENT |
| <i>C. planisiliqua</i> | scaffold_21 | 1,970,407  | 125,391    | 143,691    | 10.4  | 1,765 | CENT |
| <i>C. planisiliqua</i> | scaffold_21 | 1,970,407  | 290,182    | 291,688    | 3.4   | 442   | CENT |
| <i>C. planisiliqua</i> | scaffold_21 | 1,970,407  | 317,023    | 317,943    | 4.2   | 221   | CENT |
| <i>C. planisiliqua</i> | scaffold_21 | 1,970,407  | 499,090    | 499,748    | 3.0   | 220   | CENT |
| <i>C. planisiliqua</i> | scaffold_23 | 1,380,778  | 2          | 1,418      | 6.4   | 221   | CENT |
| <i>C. planisiliqua</i> | scaffold_23 | 1,380,778  | 7,537      | 35,224     | 41.7  | 659   | CENT |
| <i>C. planisiliqua</i> | scaffold_23 | 1,380,778  | 276,925    | 280,180    | 3.7   | 882   | CENT |
| <i>C. planisiliqua</i> | scaffold_23 | 1,380,778  | 292,068    | 294,546    | 5.7   | 442   | CENT |
| <i>C. planisiliqua</i> | scaffold_37 | 230,006    | 21         | 1,790      | 2.7   | 656   | CENT |

|                        |             |         |         |         |      |       |      |
|------------------------|-------------|---------|---------|---------|------|-------|------|
| <i>C. planisiliqua</i> | scaffold_37 | 230,006 | 13,495  | 18,680  | 23.5 | 221   | CENT |
| <i>C. planisiliqua</i> | scaffold_37 | 230,006 | 131,068 | 143,114 | 54.6 | 221   | CENT |
| <i>C. planisiliqua</i> | scaffold_37 | 230,006 | 144,218 | 152,347 | 7.4  | 1,104 | CENT |

---

5S: 5S rDNA arrays.

NOR: nucleolus organizer region, including 18S, 5.8S and 25S rDNA, only those with at least two units were shown.

CENT: putative centromeric repeat arrays. Only scaffolds more than 200 kb were shown.

**Table S9.** Location of telomeric repeat arrays.

| <b>species</b>         | <b>scaffold</b> | <b>scaffold length</b> | <b>array start</b> | <b>array end</b> | <b>unit number</b> | <b>unit sequence</b> |
|------------------------|-----------------|------------------------|--------------------|------------------|--------------------|----------------------|
| <i>A. alpina</i>       | scaffold_161    | 91,596                 | 1                  | 1,980            | 283.3              | AAACCCT              |
| <i>A. alpina</i>       | scaffold_31     | 3,882,864              | 3,880,881          | 3,882,863        | 284.7              | TAGGGTT              |
| <i>C. planisiliqua</i> | scaffold_8      | 9,101,398              | 9,097,573          | 9,101,397        | 550                | AGGGTTT              |
| <i>C. planisiliqua</i> | scaffold_7      | 9,129,079              | 9,125,697          | 9,129,079        | 485.6              | GTTTAGG              |
| <i>C. planisiliqua</i> | scaffold_11     | 7,283,533              | 7,279,710          | 7,283,533        | 532.3              | TAGGGTT              |
| <i>C. planisiliqua</i> | scaffold_1      | 15,208,799             | 1                  | 3,224            | 462.9              | AAACCCT              |
| <i>C. planisiliqua</i> | scaffold_2      | 12,270,481             | 1                  | 2,816            | 402.3              | AACCCTA              |
| <i>E. syriacum</i>     | scaffold_11     | 8,766,530              | 8,748,992          | 8,766,530        | 2509               | TTTAGGG              |
| <i>E. syriacum</i>     | scaffold_12     | 6,520,592              | 6,510,080          | 6,520,592        | 1507.3             | GTTTAGG              |
| <i>E. syriacum</i>     | scaffold_9      | 12,372,032             | 1                  | 6,880            | 991.4              | CCCTAAA              |
| <i>E. syriacum</i>     | scaffold_6      | 17,487,894             | 17,481,731         | 17,487,894       | 877.7              | TTTAGGG              |
| <i>E. syriacum</i>     | scaffold_3      | 20,634,497             | 20,628,542         | 20,634,497       | 851.7              | GGTTTAG              |
| <i>E. syriacum</i>     | scaffold_4      | 18,658,056             | 18,652,321         | 18,658,056       | 810.9              | TTAGGGT              |
| <i>E. syriacum</i>     | scaffold_7      | 14,560,423             | 14,555,641         | 14,560,423       | 688.1              | TTTAGGG              |
| <i>E. syriacum</i>     | scaffold_16     | 4,329,799              | 1                  | 2,111            | 304.4              | ACCCTAA              |
| <i>E. syriacum</i>     | scaffold_2      | 21,647,715             | 1                  | 700              | 102.4              | AAACCCT              |

**Table S10.** Summary of protein-coding gene annotations.

|                       | <i>A. alpina</i> | <i>E. syriacum</i> | <i>C. planisiliqua</i> |
|-----------------------|------------------|--------------------|------------------------|
| Gene number           | 29,470           | 33,001             | 34,766                 |
| Total gene length     | 75,645,144       | 51,262,375         | 52,103,293             |
| Gene region percent   | 23.2%            | 22.7%              | 29.4%                  |
| Coding region percent | 10.5%            | 14.9%              | 19.2%                  |

**Table S11.** Summary of transposable element annotations.

|              | <i>A. alpina</i>   |                        | <i>E. syriacum</i> |                        | <i>C. planisiliqua</i> |                        |
|--------------|--------------------|------------------------|--------------------|------------------------|------------------------|------------------------|
|              | number of elements | percentage of sequence | number of elements | percentage of sequence | number of elements     | percentage of sequence |
| SINE         | 5,996              | 0.36%                  | 1,731              | 0.15%                  | 441                    | 0.09%                  |
| LINE         | 13,889             | 3.63%                  | 8,872              | 2.46%                  | 4,632                  | 1.51%                  |
| LTR          | 78,148             | 29.01%                 | 43,042             | 20.16%                 | 27,599                 | 18.53%                 |
| DNA          | 52,824             | 6.50%                  | 27,592             | 5.21%                  | 16,103                 | 4.42%                  |
| Unclassified | 80,500             | 10.98%                 | 49,449             | 9.73%                  | 26,625                 | 11.98%                 |

**Table S12.** Number and percent of perfectly aligned genes against each intermediate assembly.

|                        | PacBio raw        | PacBio polished   | Illumina corrected | 1 <sup>st</sup> OM scaffolded |
|------------------------|-------------------|-------------------|--------------------|-------------------------------|
| <i>A. alpina</i>       | 13,512<br>45.850% | 29,294<br>99.403% | 29,420<br>99.830%  | 29,423<br>99.841%             |
| <i>E. syriacum</i>     | 11,982<br>36.308% | 32,035<br>97.073% | 33,000<br>99.997%  | 33,000<br>99.997%             |
| <i>C. planisiliqua</i> | 13,809<br>39.720% | 33,956<br>97.670% | 34,765<br>99.997%  | 34,765<br>99.997%             |



**Table S13.** Number of mismatches and alignment gaps of genes blasted against each intermediate assembly.

|       |       | PacBio raw |        | PacBio polished |       | Illumina corrected |      | 1 <sup>st</sup> OM scaffolded |      |
|-------|-------|------------|--------|-----------------|-------|--------------------|------|-------------------------------|------|
|       |       | Mismatch   | Gaps   | mismatch        | gaps  | mismatch           | gaps | mismatch                      | gaps |
| A. a. | Genes | 47,168     | 94,066 | 46              | 320   | 13                 | 32   | 0                             | 4    |
| A. a. | Exons | 15,296     | 31,286 | 5               | 60    | 0                  | 22   | 0                             | 1    |
| E. s. | Genes | 10,506     | 84,397 | 13              | 1,068 | 0                  | 0    | 0                             | 0    |
| E. s. | Exons | 6,391      | 45,581 | 11              | 486   | 0                  | 0    | 0                             | 0    |
| C. p. | Genes | 20,391     | 75,389 | 103             | 1,170 | 0                  | 0    | 0                             | 0    |
| C. p. | Exons | 14,841     | 43,875 | 85              | 732   | 0                  | 0    | 0                             | 0    |

A. a.: *A. alpina* E. s.: *E. syriacum*; C. p.: *C. planisiliqua*
