# Supplementary material for: Improving and correcting the contiguity of long-read genome assemblies of three plant species using optical mapping and chromosome conformation capture data
Source: Genome Res. 2017 May;27(5):778–86. doi: 10.1101/gr.213652.116 (PMC5411772; doi:10.1101/gr.213652.116)
Supplement: Supplemental Material [file supp_gr.213652.116_Supplemental_Table_S4.xlsx]

## Sheet: Sheet1
1	CTTCTGCGGCTGCCTTTTCTGCTTCGATCTCGGCCACAATTGCATCGAT[T/A]TCTGCTTCTTCTAGCTGGCGCAGCTTACCTTCCTCCCTAGTCATTACAGC
2	ACAAAAATAAAACCTGTGGCTGAGCCAGCAGCATCCATGACTCGAAGTA[T/C]TCGAGACCGGTGTGCTTACGGATGGCTGCAACTCACAGACATAGCCATTT
3	TAATAGTTGTATGGAATTAATGTAGCAGCTTAACTCAATGGTTACTCGC[T/A]CGAATTGAGAGCCTTATATTCTTGCTTGTGTTCTGTTGTTTAGGCCTTTA
4	TCTGTGTAGCTTCGGCTGCGAATGAAGAAAATACGGAATGCATAATCAT[T/C]GATGAATTTGTTGATGAGCTTAGCATTTCCGCCATTGCCTTTGCAGCGAT
5	GAGAAGATCAGGTTGTGGTTTATTGAGCGTAATGTTCGGTAGACGTAAC[T/C]TGTGGTCCAAGAAACATACATCGACGGATAACGGTAGTCAAAAAAGCACA
6	AAGCTGCCTAGCATTAATTCTCTCTCCCTAGTTCTCCTTTTCGCTATCC[T/C]GCTTGAGAAGTTAAGTTTGATCATTGACCTTTTGTAGGCAGCAAAGAGGC
7	TTAGGGCTAAAGAGGCGGTGGAAGCAGCTGGAGGATCGGTGAGAAGAGT[T/G]TATTACAACAAATTGGGCTTAAAGGCATTGCTTAAACCAGAATGGTTTGA
8	CTAGTTTTGCGGTTGAGATTGTCTCGGAACAGTTTGAAGGGAAGAGATT[A/G]CTCGAGAGGCACCGTATTGTAAATGCTGCGCTTGAAGAAGAGATGAAAGA
9	TGTCATAAGCAGCTATGAGGCTGGCTGCTACTTCATTAAGCTTGTCTTC[T/C]ACGGCGGGCTTAGCTTCAGGGCTGTACCAGGTGCAGCAAAAATCAAATCA
10	TTCCAATCTGGTCCTGAGCTTCCTCCGCTACTGTTGCTTCCGCAGCTTA[C/T]ACTCATTTCGTCTCCTCCTAATCCTAATCCTCCTCCAATGGTGGACATTG
11	GATTACGACGAAGAGCTTGTTCAGGTCCGTTAACGATGACGTCATCAAT[A/C]CTTCGTTTGCGAACGCGAATCTCATGTTCTACAAGAGTAGTTTCTACAAC
12	GTCTGCATTATATGTCTTCAATGTTTTTTATTAGGTTCTTCTTTCTAAC[T/C]ATTTAGTAATGCAGCACGATCTGCTTCTCCTCCTGCGCCACCATCTGATT
13	TTCCCAAGCTGCTTCTGGATGATGTTTTCGAGCAGAAGAATGATATTGC[A/G]AAAGCTGTTGAAGAAGAGCTCGAGAAGGTAGATATATACTCATTGTTGTA
14	GTCCTATAGTAAAGCTGCTCCAGAGACTGAAATCCTGTGCAGTGCGATG[T/A]CGTAAAATGATAATAAGACTTTGATTACTCTTACGCTTATCGTGACAAAG
15	GGATGCTGCTATGCCTATTGCTAAACAAGCTGGTGAAGAAGCTATAAAG[C/A]TTGCTTCTCCTGCTTTCTCAGAAGCTTCAAAGAAAGCTCAAGAAGCTATG
16	TGTGAATGTCACTAGTAGATGCGAATATGATTACCCTCGGCCTTTTCGC[A/G]TATTTTACCGACTCCCAAGCTGCCTCAATGTCGCTTTGTTTGCTTCGTGC
17	GTACTGAAGCTGCTCTAGAAACTGTTGATACTCCCCTGGTTTGGTATCA[C/G]TCCCAGCTTGATGAAACTCCATCGCTGCACGATGCTCATGAAGCTGCAAT
18	CTCATAATTCCCTCTCGGATATACTCCATAGCAACGCCGACGCAGCAGC[G/A]AGAAGGAGCAACAATGGCGACAGGAAGAACAGTGAAGGATGTTTCTCCAC
19	GACGGGTTTATGAGGCTGAAACAATCTTGTACAACCTAAAAAAGGTGTG[C/T]GCATTATACAATAAGGCCATGATTGTGCTAGGAGACATATCTAGATGTAA
20	TTAACCTCTGAGAAAGATTTGGTGGATAAAGTTCCAATTGTTGATGCCC[T/C]TTCTAGTCCTTCCTCATCTGAGTGCAGCAACACTGCTTCCAGTACTGAGA
21	ACCCCTTATTACCCATCCCAAGCCATTGTATCAGAGGACAGGGCACGTC[A/G]TGCTGCTGAAGCGGTTGTTTTAAAGGATTACAGTCATTTAGAACCTTCGA
22	CAGCATGGGTTTTGTAAGGAATCCACTAGCCTTTCTTCGAGTTCTTCAG[T/G]CTGTTATCCAGATTACAGGCTACAGATTTATCATTTTCACAGCGGGTTAT
23	AACTCGAGTCGCTGCTCATGGCCAACCCTTACCTCTTTCTCTTCAATTC[C/T]CTTCTCCGCGACGCTTCTCCGTTTCCGCAGCTCAGGTTTGATCCTAAAGT
24	CGATGCGGTCGCAAAGGTTTTCAAAAATGATTTGGATTTGCCTGCAGCT[G/A]GGCTCACAGCTGATACAGAAGCCATTTGGTATCTTGACCAAGCCGCTGCG
25	AAGAATAGTTTTGACACATTCCTCTTCTCATCAATCCTTCCCATGACTG[C/T]TTATACTCTCTGTACGTTGCTGCAGCCAACCTCAAGGCCTGAAGTAGTAT
26	TCAAGATCTGCTTTGGAGTAGTTGGCTTATCATTATTGATGTCTTCACT[G/T]TCAAAGAATGGTTCTGATATCACTTCAAGTTTGATCCCTACTTTTCCTTT
27	TGTCACCAAAGGTATGAGAACAAACATTGATTTGGTTTAATGTTGATCT[T/A]GTTTTGTTTAGTCTAGCTGTATATATACTGTTTGGAAATCATTTTTTGAT
28	CTTCTGGGTTTTGCTCACTAGGTCTAGGTTCCATTGTTACTTCCTTATC[C/A]TCATCCCACGCGCTTGCCCGGCGCGTTGTACAAACTCTCCGGTGGCGTTC
29	AGCCTTACATATTTGCTTTCTACCCTCAGGATTCTGAAAATGATGCATA[C/T]TATCTCGTCTCATTCCCACGAAAATCGGATGAACCCTTCTGCTGTAGCTG
30	CTTTGTTCCTTACAGGTGGCAGCTCTGAGTCTGTAGATGGTGTTTTTCG[G/A]AATGTTTAGGATTTTCGTGAGAGGTTTTGAAATTGAACATAAACGCTGCT
31	CACTGGAGAAAAAGGTGAAAGTAGTGAAGGTGATGGGAACAAAAAAGGT[A/G]CAGATAAGAATTTACAGAAGAATGCTACAGATTCTGATCCAAAAATTTCT
32	TTTGTTCCTTACAGGTGGCAGCTCTGAGTCTGTAGATGGTGTTTTTCGG[G/A]ATGTTTAGGATTTTCGTGAGAGGTTTTGAAATTGAACATAAACGCTGCTA
33	AAGACGACATCTAGGAACATTGTACCTACTGCTGCAGAAAGCTCCATAA[A/C]ACGTACCACTGGAGAAAAAGGTGAAAGTAGTGAAGGTGATGGGAACAAAA
34	TGTACGCAACCGAGGCTATATGAATAGTGTGAGACACCGGATCACGTGG[G/A]TAGAAATCATCCGAAGCTCGAATCACAGCTGCTTGCTTCGAGCTACATCA
35	GCAGTGGTATCTCAGCCACTACGGTGTTGAGGTTGGCCGTAAGAAGAAG[A/G]CTGCTGCTTCTGCCACTAAGAAGGAAGGAGAGGTGAGTCCATTCATTTCT
36	AGGTTATGCTGTTTTAGCAGCAGGAGCACCGTGGATACTTCAACCTGTA[C/G]AGTCTGCTATCCCATCATTGCTTTGCAGCTGTAATGTAGCTCTATTGATG
37	TGTGTGTGGCTACTATGATGGTGAAGAAATAGCTTGGAAAATTCTCCAG[G/A]GTTTGCGTAAGGAAGGGCTTTTAGAGGCATTCTCTGAACTGTTCCAAGCA
38	AACATGGATGTTGTACCTGTTGTAGAGCCTGAGGTACCGTAGATGGTAG[C/A]GTTCTAGATGGAGTAGAAGCAGCTGAAAGTGCCTGATCAGAGGGACTGGA
39	GGCAAGAGCTTTAGCCGCAGCCGCTCTTAGAGATTTAGTTTCTTGAAGA[A/G]AAACTCCTAAAGGAGCCAAGAGCTTTAATCGCAGCTGCTCTTAGAATAAA
40	CCATTTGAGGTAATCGCAGTTGCTGCAGACTGCTGGTTCGGAATATGTG[T/C]CCCCCTGCAACAGAATTCCTTATTAGATTGACCAGCCAAAAAACCTTGCA
41	CAATCTTTTACTCATACAAGAGACATATCAATGGCTTCGCCGCGATTCT[C/T]GACGAAAATGAAGCTGCAGAGATCGCCAGTGAGACCATCAATCCTTTATG
42	AAGATATTGGCTTTATTAGCCACTAGACGCACATGAGGCAACGAAGAAA[C/T]TGTGAGATATGGCCAATGGTTATTGACTTTTCAATTGGTGAAGTCGTGCA
43	GAGTACGGAGAAAGCAAAGGTAATCGGAAAAAGAAACCCAAGGATCATA[G/A]ATGTTTTACCATACCAAACGAGCAGCTTGGTCCAAACACTGACGCACAAG
44	CATCGCAGCTCAAGGCAGCCCGATCCGATGTCAACTTATGTTGAAGAAG[A/C]TGTGAAGGAGTACGGAGAAAGCAAAGGTAATCGGAAAAAGAAACCCAAGG
45	ATAAATCCAGACCCCGTTTTCCATTTGTATTTGTTAACAGCCTCATAGA[A/T]CTAACTAAGCAGCCCAAGTTATGATAATTTACTGCATGTCATACTCAGCA
46	CCGAATCTTGATGATGTGAGAGATGCGTTCGAGACTTACACTGATAAGG[A/G]GAAGCAGTATATGGAGCCTGAGGAGCTGCAATGGTTCTTGGCTGAGGTAC
47	GCTGAGGACAACTTTGTTGACAAACCCGCGGTTCGTAGTACTGGCAGCG[G/A]CGGTTAAGATCCATGGTGCTCCGACCGAGACTGTGCCTGGAGTTGGACCA
48	GAAGTTCCAGCAAGTATAGCGTAGTTCACATGTCTTGTGTCCTTCTCCT[A/G]TTTAGCCGCTGATACAGGTGAAGCCAGAGGTGAATAGGCAGCGAGTATTT
49	CTTAAAACAAACAGATCACTCACATTTCGCAGCTGATGATAACGAAAAC[A/G]AAGAAAATGAAGACCACATAACTATTCAGTATTCACACTCTTTAGAGAGA
50	ATATACAAAAGAAAGTAGCTGCACCGAGGCAATATCCAAATTACATACA[T/A]CACAACACATATACATTCATTCACACTAAAAGATACATAGTGGTAACTTT
51	ATTATTCTACCGCCGCTGCGTTTCCATCGTCGCCGATAAACAGAATCCT[C/T]TGCTCCGGGATGGAAGAAGATATGGCGAATCGTCGAGTGTCGAGTCGGAC
52	TTTTCATGGAGCTTGAGAATTTGATCAGGCGAGACCCGGCTAAAGCTGC[G/T]GTTCCAGGTGGTGGTCTACACCCAATCACTCGTTATGTCATGAATTACCT
53	TGCAGCCATGACCATGCTCTCTATTTTTTGATGGTTTCTTGTCAATTTG[T/C]AACTCTTATGTGTGATGGGATTTTTCCTTTTCTTGAGTTGTAATTTGCCC
54	ACCGCAGCTGAGAAGGAATTGGGTTCAACGGTGAGAACAAATGCAGAAG[T/C]TCACGCGGAGCCTGCTTGTAGATCATATCTAAAGTCTTGTACTCACCACT
55	TAGCAGCTTCCCAAGCATATAGAGTCTTACACAAAAGTTCCGGAGCTCC[C/G]GTGACAATCTTCTCCTCGAGGAAATTCAAATTACAAATCCCATTCTCGTT
56	TCCCCATTTCTCTCAGTTTATATAATATAAACTCTGCAGCTCTGCAACA[T/C]ACAAAAGACAAAGATAAGAAAAAGAAGAAGAAGAAGAAAAGAAGAAGAAG
57	GTGGAAACCCACTTCTTGGAGAACAAGCTGCAGAAGAATCAAAAGAGGC[A/G]ATTGCTAATGCTCTTAAAGGATCAGACCTTGTTTTCATTACTGCTGGTAT
58	CAATGTTACTCTTATTTTCCTTAGAGTCACTAGAGAAAGAGGAAAAAAG[A/G]CTGAACCTACGAAAGCCATCCAAATCTAGAGCTGCATGGTTTAGGAGCGA
59	CGGAATCTACATTTCCGGCGTTCTCTTTAAACAAAGCGTAATCCAAAGA[G/T]ATCTTATCGGCGTTAGCTGCGTAAGCGAAGAACGGATAAGCATTCACCAT
60	GGCTGACTTGCTGCCGCTGCGAGCTCTGCCTCATGCCTACACATATTTT[C/A]TAAACTGTAAGAAACCGAGCTGCAACATTTAGTAATGAAATAACGTAACA
61	CAAACCGCAACCGCAGCCACATGTGGAAATCAAACGAACAACAATCGCA[G/A]TGTCTGACCGCATGATGCAGCCGCAAACCGCAGCCGCATGCGGCAGACAA
62	TGGCTCAACAACCTAGTAAGAATCCATATGCCGGCAATACCACGCAGCA[A/G]ATGCGAACCACCACAAGTAGCAACAACAACAGCCGCAAGGTGGGTGGGGC
63	GAGGCAAGATACTCTGACTCAAGGTACCGCCTCATACCGGTTTGTCTCT[G/T]TGGCACTGGTTGCAGAAGCACTTGCTATAAAAGCCGCCATTAGTGCAGCT
64	CAGATATGTGGAAAGATCCATGCATCGCCTTTGCTATCCAAACACTGAC[G/A]GGAGAATCGCTGCATCTTCCCAACACAACAGCTACCTCTTCTGATCCCAA
65	AAACACCTGTTGCAGCTCTCTCCCCCATAATCATGACTTGCCCTAACGC[T/A]TACAAACCAATATGTGATATTAGCATCTGAAGTTGAATGGAGACACTGAT
66	ATGACATGGCATGCAAATGGTGGTAACAATGATGGAAAGCTTAGACATC[T/C]TAGAGACGGTGCGGCTTGGAAGGCATTTGATAAACAATTTCCTGAATTTG
67	TGGCGCTAGGCTGCCCTAGAGTGACCCATCTACTTTTTGCAGACGATAC[A/T]ATGTTCTTATGCGGAGCTAATGGAAAAAGCTGCAGAGAACTCAAGACTAT
68	ACCATAGCTGCATAAGTCACATGAACAAGCACTCCAGAAAACCACAACT[C/T]ACAAACTTTAACAAATGGACCCAGCATATAAACCTAGCAGCAGGACCTCG
69	CCCTAGAGTGACCCATCTACTTTTTGCAGACGATACTATGTTCTTATGC[G/A]GAGCTAATGGAAAAAGCTGCAGAGAACTCAAGACTATCCTAACAAAATAT
70	AATAATCTGCATTTGGATCTTGTGTGGCGTCATCATCTTGTTCTGTTGG[A/G]TCATTCACTTCTGCTGGTTATTCCTGGTATGGAAGCTCAACATTTGCCTC
71	TCATTGATCCCCAACTGGATACTTTGAGCAGCAAGCATTACCGCTGAAA[C/A]GACAGAACAAGACGGTAAAAAACAACAGTGTGTCGTCATCTCAAAAGCAG
72	AAGTTATGTACCTGAGCTGCATCACCATACCCTTTAACTTTTGCGAATA[C/T]TTGAAGTCCTAGCTGAAGCGCTTTCTCTCCGCTCACTAGGACAAGAGCAG
73	GGTACAAGCAATCTCTATCAGTTTCTTTTGATCATCAGCATCAACAAGC[G/T]GTGGAGAGCCAAACACAGATTGCAGCTTGTCTTGCTTGCTCTCATCAATG
74	TCCAGATAAAACAAGTAATAGACTGTAGAGCGTTACTTTATCCACAGAG[C/T]CATGACTTAAGACAGATAAGCCTTCCAGTATCATCGGGTGTAGCTGCACA
75	ACCGGAGCTTAATCAAACTCTTCACTCGAGCTGCACAGAACCCGACAAG[T/G]ACATATGTGCCTTTCATAGAGCGTACCCAAACCAACCATAACGAGTTAAG
76	TGCAGCATTTTAAGCAAAAAACCACTGCTTACACATCTTCACAAGAAAA[C/T]ACAGGAGAAAGAGATCATACAGAGCAAATAAAAGATTTTATCTTCAATAG
77	CATTTTCCTCTCAAAGCTGCCCTCAACAAACAGAACCCCGTTCCCAGAT[C/T]TCAGACTACAAGTGATGCCAGTGTTGCTGCATCCTCCGTGCTTTCATGAC
78	TGGCTAAAGATTTCCAATCAGTTCTAAAAGAGTTTCAAAAAGCACAGAG[A/G]CTTGCAGCTGAAAGAGAAATAACATATACTCCTGTGGTCACGAAAGAAAT
79	CACATGCGGCAACTGCACAAGGCACTGCTCAACTAAGAAAAGCAGCTAA[G/A]ACTCAACAATCAAACTCATCTTTGGTACACTCTCAAGAAAAAACTCTCCT
80	AGCTGCAGCAAATACCCCGTTGTATGATGGTTGTCGTGATGGTCTCTCG[T/C]GGTTTTTGCTAGCAGCTCGGCAGATGAACATCAAGGTGGATCACAATGTC
81	GCTACCCTGTGGTGAAAGCACAATCTAACAAGGTAAGCTCCTTAATCAC[T/C]GATTTCGTCGAGAAAGTGTTTCTCCGAAAATTTGTTCATTTCTGGACTCT
82	AGTAACCACTCTTCACAGAATAAGAACCATGATCCGTGAAAGCCCAAAT[G/C]AGTTTATCTTTCGAGCAGCTTGTAAACATCTTCAAAACACGTCCCACATC
83	ATCCTTTTGATCCATAGATTTCTGAACTTTTAACCTGTCAACATCAACA[G/A]ACTGCTGCATGCTTGAAAAAGACTGTCCATTTTCTTTACTTTGCACATCC
84	CTAGAATGATGAATTTGACCTTATTACGCGTCAAAAATAGCTCAAGCAT[G/C]CCAACATATAACCATATGATTGCACTTGTTGGTCTTATGGCACATGCTAG
85	GCCCACTACTGTGCATGCCTTAGCTGCGCCCACTACTGTGCATGCTTTA[C/G]CTGCACCCACTACTGCGCCGATCACTACTGTTGCTGCCAAAACCAGAACT
86	AAGTAAAGCAGCAAGAGGTGGATGAGAAAGAGCAAACTGGAAATGAACT[G/A]AGTGAGAAGAACCAGAGAGAAGTTGAGAAGCAGTTTTCAGGTGTTGAGCT
87	TCCTATGTTTCAGCAGCATTGCAGGGTAAGTTGTTGAAACCTTCATCAC[T/C]TCATTAGCGAACTTGAAAATTCAGAAAAGGGATATATGCTCTTTAATTGG
88	ATGCAGAACAAATTAAAAGGCTACAAGCAGCAGCCAGAAACGAAGTTCT[T/C]CCATTGCCAGGTGTTGGGAAAGAGGATCTTCAAGATCCTCAAAACTTGTT
89	TCAAGTCTTCCCAAGACAAACGGTTTGTTTGTGAGGCAGCAGAGAAAGC[T/A]TTAACAGCAATGACCAAATATGTTTCCCCAACTTTGCTGTTACCAAAGCT
90	TTACAATCATATCATGTTGAAGATCATAGTCAGCAGCCTGAACCTGAAC[G/C]TGCGAAAAGGTTATTACGATCATTTCATGTTGAAGATCATAGTCAGCAGC
91	GAGAGTCGTTGTCACATATTTGATAAAAGTCCAAATGAATACAAACTGA[A/G]AGTTCAAAAAGGAAGCTGCACATGGGTGTCTGAATCCACCACTTTCCAAG
92	TTATGAGCAAAAGTATGCAGCAGTTTCTTACCTTCTTGTCTATGGATAT[A/G]CTTTTCTGTTGGGTTTGTACGTTATCTGAATATTACTAACACTGCGTGGT
93	CATCACTTCATTAGCGAACTTGAAAATTCAGAAAAGGGATATATGCTCT[C/T]TAATTGGATTCATTACCCTTGAAAAGAAAGATGGTTTAGCTGCCAAGAGC
94	AAGGAAGACAAGAACTCTCTATCGTCTCATCAAGCTACTGCAGCGGCCA[A/G]CTCGACCCTAGTAAGGTTCTTTACGGAGGTCCCTGATATGAAATCGTCGC
95	AATCGGTCGGAGTTCAATGCCTTGTGACGTTTTGATAGGAGTTTCTGGA[C/T]CTGCGCCACAGTTGAGGAGGACTCTGACGGCTGCCTGGTTTCCGCAGAGG
96	TTAGAAAGTGTATGGAGAGGGATAAAACAATTGCTAGAAGAGTATTAAA[T/C]GCGTTTATCTTAAACCTATGCAGCAATGGTTAGTGAATAAATTCATCTTG
97	TGTTTCAGAATGGCAGCTGATCAGAGAAGAAAACGGATGAATAGTGCCA[G/A]TGTTATTGGTTTTAGTTCTCGGGAACATTATAGAGCTAAAAGGAAAAAGA
98	CAACGGGACTGGGTCGGGTGAGAAGTTTGGGTTGGTGTTTAGAGCAGAA[A/G]AAGCTGCAACGCAGATAAGTTTCACCAGCTACTCAGTTACAATAACAAAG
99	TCAAGCTGCAACTTCTTATGATAATCGCTTAAACCTTCCGACAATATAG[T/A]CTCAAACGCATCCCGCAAAGCGCATAACTCATCAGCAGCAGTACCATCAT
100	TGTGAAATAAAATGAACCAGGAAATGTTTTTCGCACGGATAACTGCAAT[A/G]AACATCTTTACCTCCTGTAATGCCTGGCGTGCTGCTTCTCTTTCAAGCTC
101	TACAACAAAACTTTTCCTGCAGCGTTTCCCATAGCCATAAAGCCACTTC[C/T]GGGGCTGAAGTCCAAGCAGCGAGGGAAATGCATTGTTGTGTTTGGTGGTG
102	TGTGATTCTGGGTTTTGTTTTGTTTCAGAATGGCAGCTGATCAGAGAAG[A/G]AAACGGATGAATAGTGCCAATGTTATTGGTTTTAGTTCTCGGGAACATTA
103	GCTGCAAAACACATGAATTGACATGAAAACGCATGAGAATTTCCACAAC[G/A]AATCATTACTTTCAACACAAGAAACCTCTCACAATTAGGCCATTAGCAGC
104	AGCACTTGCAGCAAAAAACAGATACGAGTTGGATTCAAATTCAGAGGTA[T/C]TCTTCTTGACTACAGGAAATTGAGTAGTAGCCCAATTGTTATAGACAATG
105	TTTCACCTCCCTTCTTGGCAGCCTTGGAGTCATTGGCAAGACGGGTACG[A/T]GCGTAGTCAAGGGAGTACACAAAGAGAAGGGAAGAGGCACCAGCAGCACC
106	TTTGGTGTTTGAAGAAGCTGCTCTCTAGTTCAACACATATTCATCAGAG[T/C]AAGTCTCTATTTTTATAGGCACAGGAAGAGTAGGTCTCCTACACCGAGGC
107	TGTGAATTCAGCTCCTCTCCAGGGTCTCCACGCAAATCAGCAATCAAGT[C/T]CCCAATTGTCTGATCAGCAGACTCAATCTACGCTTCATCAGTATCAACCG
108	GACTTCGTCTGCTGTAGCTGCTTGTATGTCCCCATTGCTCTTGCGTCCC[C/T]TACTGGCTGGAGAATGTGATCTGGAAGGTTTTGACACTCTAGGAGATAAC
109	CTGAAGCAGTTGAGCATTACACAGCAGCCTTGTCTTGCAATGTGGAGTC[A/G]CGTCCTTTTACTGCTGTGTGTTTCTGTAACCGTGCTGCTGCATATAAGGC
110	AAGCAGAGAGCAAGCCATTGGCGCAGGCCTTGAGCAGCTACAGCCTCCA[C/G]TTCCGTCTTCTTCTACTTCAAGCAGTAAAGTAGGTACGTTGCAGCCCGAG
111	GCACAGAGATAGGGGTGATTATCAACATTATCCTCACCAAAATTATCAT[A/C]TTCATTAGTACCTCCAATAGGAAGCTTTTAAGGAGGGATTGGTTCACGGT
112	TCGATGGCTGCAAAGAACTATGGAAAGACAGAGACTACAATCATTCTGA[G/T]GAAAGCCCTCAAGCTGGTCCATCTGTTCCGATCTCATTGAGCGGTTTAAG
113	GACAACGTATGGTTGGCAGATTGGTTTTGGAGTGTCTGTTGCAGCCATG[G/A]CTATATCGGTGGCTTTGTTCTTCGTAGCTTCTCCGTTTTATATCAAGTTT
114	CCTGATACAGATCATTGTGTAGTCAAATGTCGAGAATAAGCCTCCGTAT[G/A]CACCAAAACTACCTCCTAAACGAGCAGCATTCATACGCACCGCTTGTGTT
115	ACACCAGATATGAAGAAGCCGCGCTGAAAAACGTAGTACTCGCAATGGA[A/G]GATTTGCAGCTCAACACCAGTGGCTGTACACTGGCTGCTACTCGTGAGAA
116	GATTGTCAACATCTCTGAAAACGTGTTCAGTGATTACACCAAAGCAGTG[C/A]ACTGTGCAGCCTGGAATTGTAACTGGTCCTACTGCTGTTGGAATACCAGA
117	CACAAACTTGTTCATCCTCCAATGTGTTTATATCTATTCCAGCTTCTAT[A/T]GCAGCATTCCAGTTCCCAGTTTCTTCGTAAGAACGAATCAGTCTTGTAGC
118	TCTTCTCCCATTTGAGTCTTTGTCTTGAATTTACCGTCTCTTCGATCAA[C/T]TCCCTAGAACGGTTACCCATTGAGCTGCATTCTTGAAGAACACTTACAAT
119	GTGACGTAAGACACAAATCTAGCTGTAATGTCGTCAACGAACAATATTT[A/G]ACCGCATGATGACGCAGCCGTAGGTCGTTGCGGCTAAAAAACGAACATGC
120	TCGCTGCGTTTGTACGGTTTAGATTCCCTACGGATGAGTCTACGATAGA[C/T]TTGATTTTTGATTGGGCGAGTTTTAGGTTTTCGTAAGAGACGGAGATCGC
121	TCTTTGCTGCGATTCCTACTATGCTGGTTAGTTCTTGAACAGATTCTTA[G/A]TCCATTGATGGATTTTTGAGGATTGATTTTGCTTCTTTGAAATGTTGAGA
122	GCATCGGAGAAGGCATGCCTTGGCTGGTCTCTCAGACTTAGCCGTGATC[G/A]AAGATCGGAGATGTCTACAGCTCTCCTGAATGTTGCATCGGCGCTAGCTG
123	GAAAGGCTGAGCAAATTGGAGAGGAGGAATTTCAAAAACGGCTCTGCCA[C/T]TAAAGTAGCCGTTGTTGGATGTGGTTACGCGGGAGTTGAGCTAGCTGCAA
124	ATCTAGGTGAGATGATGACTCTTGGAAGATCTGATGCTGCTATTTCGCC[A/G]AGTTTCATTGAAGGGCTTACACTTGAAGGTCCAATTGGTCACGCAGCGAG
125	GTGCATTGGGTGATGCAGCTGCATGGCCCGTGCAAGGTCTGATAAGACA[T/C]TTTAGGCCAGAGATGGAGAGAAGGATCAGGGAACGCGCTGAAAGGGAGTT
126	AGGATATATCCTCTACCGTATCAGATCCAGGACCCATCTGGGATTCTGG[A/C]CCCAAATGGGATTCTGAACCTTCCCCCTGGGACGTAGAAAACCCGATTGA
127	TAACCGTCTCAACCGTTGTTCCAGCGTTTCCAACGTGAATCTGAAACGC[G/A]CTCACTGATTCAGAATCCAAAACGCCGCCTCTGCAGCAATTGATGAGCTT
128	TCACTCTTCCTTTTGAGCAATGCGCGTAAACCCGTAGCTGCGGTGGTCC[A/G]TCTGTATGAACCGCAAGAACCCCTTTTCCCATTAACCGATGCCAAAGCAG
129	GAAGTATAAGTCCTAATCAACCAGGACCTAGCCACTTCTCGTATGGGAT[G/A]CAATCGTTCTTAAACAATGAGAACGAGGCATACAAGCCTCCTCAGCCACA
130	CAGAGACACTTCCCCAGTTGGTACAACTTTCAGAGCCATACTTGCAGAT[A/T]TATGAGCTGCAGGAAGAAGAGTAACTCTTTTTTCTTGGATTGATGCGTGA
131	TTCAGAGTATTCGTGCAGCGGAAGTCGGAAGAGTTATGGTACGAGATGC[T/A]GGATTTGCGCGTTGCAGAGACACTTCCCCAGTTGGTACAACTTTCAGAGC
132	AACCCTAATTACAAAAACCCTGATAAAATTATTCGATTTAGCGCAGCTA[T/C]GACTCGACACGCTTCCATTGAGAGTTTGTGGAAGGCGATCTTAAGGGCTG
133	GAAGAGTGACTCAATCGCCGTTGATGTCCCTGCAGACTCTAGCGCAGCC[G/A]TTAAAGGCAAAGCTCCTCTCCTCGGTTTAGCCAGAGACCACAGTGGTTCA
134	CGTGCAGCGGAAGTCGGAAGAGTTATGGTACGAGATGCTGGATTTGCGC[A/G]TTGCAGAGACACTTCCCCAGTTGGTACAACTTTCAGAGCCATACTTGCAG
135	CTCGATTGCTGCTGGTAATGGAAATTTTGAGATCGTTATGGCCTTGTTG[C/G]AAAAGAATCCCGACCAACTTGCAAAAGAATCCCGTCCAGGTAAATCCGAG
136	TGCAGCAGACCGATTACCTCTACTCAATGATACCTATTATCGAGATATC[C/A]TTTGCGAAATTGGAGGAATGTTCTCTGTTGCAAATAAAGTGGATAGCATT
137	AGGTAGGAAATTGATCAGTGTGGTTCTCTTTGCAGCCACATGTTGATTT[T/C]GGATTGAAAGTGCTTGGAGGAGATCTCATGTCTATACCGGGTCTCTACAG
138	ATGTTCACTAGTCCCTGGAATCAAATGCAATAACGGATTGGATTTGAGA[C/T]TGAGATTAACAGTCATTACTAGTTGCAGCAAGTAAAATGTGAAACTGTCT
139	CACATGTTACTTCATCTCTCCACCCAAAGTAATTCCTGTTATCATAAAT[C/A]TCATCTAACCATTCTTCGACGCCTTTTGAGGATACGGATGAGCAGCTTTA
140	TGTCTCAGGTCTTTCCTGAAGAAACTTGACTTTGAAGCTCATGTACATG[A/G]GCTTCACGGCAGTCTATTAGAAGCCAATGCAGAGAAAGAAGACGGTAACG
141	TCCAACCTACAGGCCGCCTACGCAGCAGCTTTCAAGGTTAACCTTCTTC[C/T]TCAGCGCCTCTTTTGAAGTGAATTGAGTTATTATTTTGAAACCAAACCTG
142	GGAGGCGGATGAACGCTGGAAAATGGAAGATGAATCAAAATCAAACAGA[A/C]TCGAGTTACTTGGCTGCTTTAACAGAATGAAGAATTACCTTTTTCTTTTA
143	TGCTGGTGGCAGCATCCTCAGCATTCACCACACTGCCTGTGTCATCTTC[C/G]AGGACTAGCTTGAAATCCGGAGGAGGGGCTGCTTCCCCGGCCGTGATAAC
144	CCACCGCGGATAAGGATTCAAGGTAAAACGACCTTGTTGCGATAGACTG[G/A]AGCTTCGAGGAGGCTGCTATGTCGCCATACTTGTCGAGGATCGCCTGGAG
145	TCTGAGTCTTTTAGACCAATGAAATGCTGCTCTCACCGCCTGGAGGCTT[T/C]CTCACACCGCCAAAGTAGTCACGGGATTCGGACTTTCCGTCTGCGAAGAT
146	CAAAGTAGTCACGGGATTCGGACTTTCCGTCTGCGAAGATATTGTTTCC[G/A]CTAATTTCACGGAGTTTAGCTGCGCTTAACTGCCTATCTGCAGTACCAGG
147	AATAATACCAAATGGTTCTCTGAGTCTTTTAGACCAATGAAATGCTGCT[T/C]TCACCGCCTGGAGGCTTCCTCACACCGCCAAAGTAGTCACGGGATTCGGA
148	TATGCATTGGTACATCGGCTGCTCCTACTTTCTTTCCTCCTCATTTTTT[T/C]TCCAACAAAGATAGTCAAGGCAAGACGTCTGAGTTTCACCTTGTTGATGG
149	ACAAAAGCCCCTTCGAAAGCGCTGCAGCTTCTCGCACAGAGGAACCTTT[T/C]AAAGGGTCAATACCCTTTGAGTCATACCCAAACATCTTCTCAGACAAAAT
150	CCTTTGAGTCATACCCAAACATCTTCTCAGACAAAATCCCAACCATAGG[C/T]GCAGCAATAGCCGAGAAAGACCCTTCGATAGCACGGTCAAACGCGTAGAT
151	ACGGAATGGTCATCATCGACAAAAGCCCCTTCGAAAGCGCTGCAGCTTC[T/A]CGCACAGAGGAACCTTTTAAAGGGTCAATACCCTTTGAGTCATACCCAAA
152	TGGAGCCACCACATCAGTTTAGAGAAGAAGGGAAAGTCATAAGATCCGA[A/C]TCATGGAGTCCTAGTTTTCTTGATCGAATCCCATTTGCTGAGCTTTATAC
153	GTTTGGTTCGATCATGTTGAACCGGATTATGTTCAATGGCAATTGCTGC[T/C]TTATTATCACAAAACAAGTCTATCTCACATTCTTGAGTGAGACCAATCTC
154	AGCCAGTACCACCATAGCCAGTTCCATGAGCTTGCTCAGTACCCTGGTT[T/C]ACTTTCACCATGAAAGCATCAGATATCGCTTTCAGATCACCGGGAACCGG
155	AAAACAAACCTGGCATTGCACTTCTACATTGGTGCAGTTCACAATCTCA[G/A]ATGCAGCAACAACATCCTATACATACCGATGTGTTAGATCTTACATTATT
156	AACTTATCTTGATAAGTTTATCTGTAGCTATAGCTTACAAAGAGATAAA[G/C]CATGGATGCTTCAGCTTGTTTCTGTTGCTTGTCTTTCTTTAGCTGCTAAA
157	TTCGCTTATTTTGCTAGCACAAGCCAATGCTCACCTCAGCAGAAACCAT[T/C]GGTGCATTGACTGCAGTAGCAGCAAGCTCTCCATTCAGAGCTCCAACAAC
158	TTTAGCTATAACTTATCTTGATAAGTTTATCTGTAGCTATAGCTTACAA[A/C]GAGATAAACCATGGATGCTTCAGCTTGTTTCTGTTGCTTGTCTTTCTTTA
159	CTGCTTCGGTTTTGTGGCAATCGTTAAGATCGGTGCTCTCATCGGCTAA[C/T]CATGAGGTTCGTGCGGGATTTGAGCTACGTGTTGCTGCTCTTTTAGCTGA
160	CCTGCAAAATTCACAACAAAACAATCACGAATGTCGCGAGAAAACAAAG[G/A]AACAGGAAAAGCTGCAAATGAAAGTATATCTATACTCTTACCTTATCCGG
161	TGATCCTGACGATCCTGGTCCTCATGTAATACTATATAACATCTATGCC[T/A]CGGGTGGTAGATGGAACGATGCAGCAAGAGTGAGAAAGAAGATGAAGCAA
162	TTCCAGTAACAATCCTGATCTTCTTTGTCGAGAACGGTGACTCCTACTA[C/A]TAGATCCAGATGGCGCTGCAGCTTCGTTTGAAGAAACGGATGGGGCTGTA
163	GCATGTTGTGTAACACAATAGGTGAGTATCTTCAGCTTTCCATTTTTGA[C/A]TCTGCAGCGGAAGATAAGCGTAAAAACAGTGTATTTTTTAGACTGTATAC
164	TGAAAGGAGCTCCAATGGAAAGTTTAACTTGAATGTTTTTTTCTGTGGT[A/T]TTTCTGCTTTTGCAGCTATGTATGGCATAGTAAAAGCTAAAAGACATCAG
165	GCAGCCTTTGCTAAACACATTTTTATTAACCCAAAGAATTGGGATGGGT[C/A]ACAAGTCTCAATCAAGTTGCGTAGGTTAAAAGTAAAACAATAGAATAGAG
166	ATCTAACGTGCGCCGCATCGCTAGCGTACACTAGCTGCTCGTCCACGTC[G/A]TAGTTACAGTCGTAGTCTCTATAACAAAGCCATGGTTTCCAACCCAAGTA
167	GCCATGGTTTCCAACCCAAGTAGTGGACCGCGTAGAGCTGAGGTGGTTC[A/G]GCTGCGAAGAGGTTGTTCTTGATGTTTCTTTCGTTGGTTGTGTTCGACCA
168	CTTTTTTCAACTCCGGGATGTTGATATTTCCCTTCGCATCAGTTCCAAC[C/A]GTAATAATTTTCATCCCGCACATAGCAGCACTTGCAGGGTTTGTTCCATG
169	ATGCAGCATCTGTGAGATTATTTGCTGAACGCGGAATGGAGTTCTTTGT[A/T]GCTCAGTCATATAGTAAAAATTTGGGTCTTTACGCAGAAAGAATTGGGGC
170	CTTGGGGGACAGAAACCAAACCGATAACCTCAACAGTGGATTCAAGATT[G/A]AGCTGCTTGATGAATTTGATCATGTTCTCACCTACTTTCGATTGTTTGGC
171	CTTTGACATCGATATCCGAGTGCTTGAAGAGTTCTGCAGCAGCTAATGC[T/A]TTGATCGACGGAGAGAGTGCATTCTTCATTGAGGTGGGAGGATTCTGTTC
172	ATCTCGAGCTCCAACCGAAACTGTTTCACACTAGTTAAAGTGTCCAAAA[A/T]ACTGTCTCACCTTTGTCAATGGATCAAAGATTGAGCAAGGTTGATGCGGT
173	GCTCAAGTGAGAAGCTTGAAAACCAGCTTCTTGCTACAGAAGCTCAAGT[A/G]GAGGATTTCAGTGCTAAAATGAATGACTTGCAGCTTAGCCTAGAAAAATC
174	TCAATCTCATCAAACCTAGGACCAGTTTTCCCCAAAGCTAAACCAATGG[T/C]TTTAGATTTCTCTAAACTCGATTTTAAAGACTTTCTTGCAGCTATTAAAC
175	CGGCTGCCTATGCTATGCCCATCGTTATGCTCGTGGCAAAGACAAATTT[G/A]GAGATCGCAGCCGCAAATGCCTCTTTGTTGGATATCCTTATGGCAAAAAG
176	AAGAGGGATTTGGATGGCGAAGAGCAGCGGAGGAAGGAGGGATAAAGAC[A/G]GAGGAGGATATGGCACGAATGGATTGGTTGCTGTGGCAGTAGATAGAGAC
177	TCGGCAATGTTGGACTTCCACTTGAGGCATCTCTGCTAGATGGTTCGGT[G/A]AAAGATCACAAGGATGCTGACTTAAATCTTGAAGCAGCTGAAAAGAAGGT
178	GAGCTGCAGATTTTGTTACGGAGTTGCAAGACCTACATGATACAGCGCA[A/G]ACGAATCTCGATGTTGCGGCTGCCAAGTACAAAGCTGCCGCAGATCTCAA
179	GTACCAGCGCAGCACGCTGATAACTATCCAATCCGGACCAGTAAACTGG[C/T]AATGCCTAGCACGGTGGCAGCCATTCCTTTAGTCGGCCCGTCGGCAGACT
180	TGTTGTTGGGGATGTGTATTACACTAAGGCATGGGGTGCTGCATACACG[G/T]GGACTATTCATCCCGTACCAACTGCGGATGAGATGGTTAAAGTGGAGAAT
181	TTCTACCCCGATGGCGATAGCTAAACATGTTCACAAGGAGGTACTTCTT[T/C]GTCTCTACTCTCTTAGCAGCTCGGTAGAAGATGATTGAGCAATAGACTGA
182	ACCAAGAAATATCGCAGCCGCAACAATCTGACTCGTCTTAAACTGCAAA[T/C]AAATCGACGTCCTTAAACCATCATTAACGAAATTAAACGCAGCCTGAGAT
183	GTTCTGCTGAAGTGCTCGGCTGTTCTTTAGTCATGTAAGCTGCGATGCG[A/C]GGATCAGAGGTCTTAAAGAAGTTAACAAGCTTTGTCATTTCAACGAGCTG
184	CAGCTTTAGCCGCTACAACAGCTGCGTCAGCGGCAGCAGCAGTAGCCAC[C/A]GCAACCGCAATTGCATGCGTTCTACGCTCTTTCTCTTCCTCTCCCTCTGC
185	AGGCTTCTTTTAGCATGGCAGCTGAGTCTTCAACCATATTCAGCTTTGC[C/G]AGAGCCACGGCCTGAAGGTAAAAGGCAGTGGGCCAGTCAGGATAGGCACA
186	TACCGGCTCTAAAGGCTGGTATCAAAGGTCTAACTCGCTGAGTACCTCC[T/C]GCCTCAAGTTTCTTCCTCGTCTCGACAGCTCTTCTCTCACGGGCAGCTAG
187	CTGCTTTTACTTCTGGGAGCTTAGTGTCGTGTATGACTCGCCCAGCGAG[T/G]TCATCATTGCCAAAGGTAGAGAACTGCTGTGAGGCTGCCTACCGAGGATC
188	ACCATGTCCCCCACTGATTCTAACCACTGCATTCCCAGAATGACGTCGG[T/C]GCTGCCTAACTCGAGTGGTAGGAAATGCGCAACCACCAACAATCCCTGCA
189	ATCTTCAATGCAAAGATCATTGCAGCCAACTCCAAGTCATTAACAAGAT[T/A]ATTGCCCTCGTGCTTCCTCAACTGCCTCGAAGCATACGCAATCACCTTAC
190	ATATCTTCCCACGCCTCTTCTGGGATGGGCAGGGGTTGCAGCAAACCTG[T/C]AGGCGCCAAGGTTGAATACTTGTGGCGCTGGCATACCTAGCAAGCTGCCA
191	GTACAGTTGCCCTCCTCCGTCTAAAGGGGAGGTGGATTAAGTGCTTTAA[T/C]GAACTATGGGGTGACTTGATCCCTGCAAAGGGTACATAGGCAGCTTGTCT
192	CTATCCTCTTCCTCGTGTTCCAATCCAATGCCGGTTTAGCTACAACAGC[A/G]AACAAAATTAGTTAAAGTCATTGAAAATGAGATTTGGGACCAACGATTCA
193	GAGTTCAGACCTGCAGCCGCTGCCAAGGCTACCGCGGCCAGTCGATTGA[C/T]GACCGTTGCTCGAGGAAAGGCAGCGGCGAAAGGTCGTCAGTGTACTGGAA
194	CTGCCCGACGAAAATTCTCCTCAACGTGTGATAATTTGCAGCGTCGATC[G/A]TTGCACCGCATGTGCGTCGATCGACGGAATGCCTGCAGCTCGAGAATTTT
195	CTAGCGATTCCATCCAAGGCAGTGCAGCTGCATCTGACAGTGGTGACTC[T/C]GAAACCACTCAGTCTGTTTCCCCACCGCTTCCGGAGGAGTCTGTTGGTGC
196	CTGCTGGTGATTCAAAGGTTTTCTACCTTAAGATGAAGGGAGATTACCA[C/T]AGGTATTTGGCTGAGTTTAAGACTAGTCAGGAGAGGAAAGATGCTGCTGA
197	CTCTCCTAAAATAAATGCAGCCACGTTCTTGATGGGCATGAGATAGTCA[G/A]CTAGAAATCTGGTTTTGAAGTTCCCATTACTCGCAGCATCTAAAGCCATC
198	CAGTAGCCACAGCAACCGCAATTGCATGCGTTCTACGCTCTTTCTCTTC[C/T]TCTCCCTCTGCGTAAAACGATCTCAGCCACGCAGCTTCTTTCTCGGAAAT
199	CGGTCTTAACTTTGGTGCTCGAAACAGCTTAGACGAAGCTGCGGTACTT[G/T]TAAAGAAAGGAATTGTTAAGCCACAAGACTTTAGATTCTTCGTTGGTTAC
200	ATGCCTTTAGTTTCACCACATATATTACATTATTTTGTACACTGCTGCG[T/A]TCACCACATCACACACCCATCATCCTGAAACTACATTGTGCATTATCACC
201	CAGACATACTAGTTTACTGGCCCGGAGTTTGTAGTTACCAGCTTGCTGG[T/A]GTTGAGTTAGGGCTGCCAGCGTGCCAGAAAGAGTTGAGGAGTTGTATCAC
202	GCTGCTGGCTAGTGTTCACCGTGACACTAGCCTTCGCCGCGACACTAGG[C/T]TTGGCCGCGACAGGAGCCTTGGGAGCTGCTTTAGCTTTCGATTTGGGAGG
203	AAGGGGGAAATATTTATTGTGGACCTAAAGAGGAGGATGTGTAGCTGCC[G/A]CTAATTTCAGTTGCTGTTGTTGGGGATGTGTATTACACTAAGGCATGGGG
204	CATAGATTCTAGGCTGCCTTTTATTGACAGAAGAATGAACTTACTCCTC[T/C]ATTCTGCTAAGCACGTGGCAAGAGAACGTTTGAAGGAAACTCGTCAGATC
205	TTCCTTTAGTCGGCCCGTCGGCAGACTTTCTGAGTTTTGGCACTCATGA[C/T]CCTTCTAGCGAGCAGCAGAACGCTAGGTCTTCGTGCCATATTTCAGGCCA
206	GAAGAGTCGGCAATGTTGGACTTCCACTTGAGGCATCTCTGCTAGATGG[T/C]TCGGTAAAAGATCACAAGGATGCTGACTTAAATCTTGAAGCAGCTGAAAA
207	AACAACTATTTATTCTCTGCGTAGACTGAGACTGAGCGTCATGGGAGAA[A/G]GATTGCTTTCGTGACTGCAAACTAAAGCTGGGTGAGAAAGTCAATTGTTT
208	CTGCAACAGCGGTGAGACAAAGATTGTCTCATGGGGTTGGAACCGTAGT[C/T]GGCAGCTTGGTAGAGGAAAACCGGAAAACCTTCCGAGCAAAGTGGAGGGT
209	TTTTCCCATTAAGATCAGTGCAGAGGCTGCCAATCTTCCCATTGAGATC[A/T]TTGTAGAGGCTCTCAATCTTCCCATTGAAGTTCATTGTTTGTGCTTGCTG
210	CTGCCCAAGGGTTGACAGCGGAGGCTGAGGCAATGTTTTGTTCTCTCCT[T/A]AGCCATGAAGAAGTTGCGGAGCTGCGCGCGTCTTCGGAGTCCTTGGTTTG
211	AGCTTTTTAATACTGAAAGTTGCACTTTCTAAACTTTTATTTCCTATGC[G/C]TTTTTAGTAGTATGTTAATGGAGTGGTTAGTAGACTACTAACATCTTTGT
212	TGATGATTAACAACACATGTTTCTTCCTCTGGCAGCCATACCTTGTATC[C/A]TTTGGTAATTGGAGGGTAACCAATGAATACTCCCTTAACTGACTTGGTTG
213	GGCTCGGACGCTTTAGACGGTACTCGAACTTGCGTCGCTGCTTCACGAT[C/T]TCTGAAATCTCTGCACGGGTGAAGATTCCTCTACGTTCTAGATCATCAAG
214	GAGATAGGCATCATAAAACAAGACATGGTGTAGGACGGCATTGAAGTTA[C/T]AACCGATTTTAGTAGGACTTGCTTTCCGACGGAGGATAATAACCGGGACG
215	TTGACGCCTTCGCAGCACATGCTTCGATCTTGGAGCGAGTTGCTGTCCT[G/A]GACCAGAGCATCCTCGCTTCATGCTCCTTCACTTCTAAGGACTCTTACTG
216	AGAACAGGCTTATATAGATACATACTCGATCTCAAGCTTCCGTGCGAGA[T/C]GGGAATATTTGTCAGCATCGAGCTTGGCAATGATGATAGGCTTCTTCAGT
217	GAGATTTAACTACACACATTCAGGGATGCGACGGCTCAATCCTGGTGGA[G/T]AATGGACCGATCTCTGAAAAGAATGCATTTGGGCATGAAGGCGTTAGAGG
218	AAGGGGGCAGCAAGATGAGATTTACGACGTGCGGGATGTGTTTAAGGAA[A/C]GCCTTGTTGTTGTCAATGAGGTGTTTAGGGTTTCCTGATGCCCTAGGTGA
219	CAAGAACTAAGACCCCGAAGCTATAGACATCAGATTTCATGGAGAATTG[G/A]CCGTGCATCACATATTCCGGAGGCATGTAGCCGCTGCAATAGTAAGTGTA
220	CAGCTGCACATGATGGTAAAATTCCATACTATACTATTGTTTGCTACCT[A/T]AAAATTTATGGAGCTTAATGCTTAGTAACATTTGATTTTGCAGATGGTGA
221	CTTCCCATATTGTCTTGAACTCTGTTAGATTTGAGTTGAGATCTCCACT[G/A]TTGTAGAACACCTTACGTGGCTCAAGATCCGCAAATCCTGATAAAGAAAC
222	TGCTACTGGTTCGAGCAATATTGAATCTAAGTAGCATAGAAGCAGCTTC[G/A]GTACCTGATCGCTTTGAGTTAGACGACGTAAAACCGCAGGTTATTGCGCG
223	TCTCGAGTTCAATGCAGTGGCTGCACGCAATCTCGCCAAACTCAATGTT[A/G]TTGTGTAACCCACTGGCTAAAAGCAAGGCTCCCCAAACTCCAGCATTTGG
224	TAAGCATGACCTTGCCAGAGAGGATCTGAAGAATGATGACTCCAAAGGC[A/G]AAAATGTCGGTTTTCTCGGTGAATTTTCCGGTTGTGACGTATTCGGGAGC
225	AACCCGAAGGATCCGTCTCGAGTTCAATGCAGTGGCTGCACGCAATCTC[G/C]CCAAACTCAATGTTGTTGTGTAACCCACTGGCTAAAAGCAAGGCTCCCCA
226	AACCACGTGGTGCCTTTCTGCTGCAAACATTGAGAAGCAAGCTAAGGTT[A/G]ATAGGAAGGTTAAGGTTGATACCAAGAACACTAGCCTTTAGGGCAGTGCA
227	TTCTCCTCCGTTGTCGTAAACCGTAGCTGCTTCCTCCGCCGTGTTGTAA[C/G]TACCAAGCACAGAGACGTACACGTCTACTTGGATCTCTAATCTCAGCAGC
228	TCCACTGCTCCAAATCAATACCAACAGATTAAGAGAATATTCTTAAAAA[A/G]GAATGCTGCTCGGTAATCATCAACTGAACAGATTCATTACTGAATGACAG
229	TTGATGGGAAAATATATGTAACATCAAGCTGCAAGAAGCTCGATTCAAC[A/G]GAATGGATAGAGATTTTTGATACAAAGACCCAAACTTGGGAGTTTTTGCA
230	CAAGCTATATATTTCACTGTTGACTTGTTTTTGGTTTGGTTCTTTAATG[G/C]CTGCTCTTTTTCTGTTCTGAAGGTACTTGAAGAAAAGGGAGAGAGTGCTG
231	TTGCTTATATGTTGTTTTGGATTCGCAGCTAAAGGAGTTCAATGATCGT[C/T]TACAGAGGTGAACACCGAATTGCTTATATGTGCTGCTTCTTTATCCCCTA
232	CTTGCACCAATTTCTCCATCTGGGCAGCCTCTTCCAGTTGTATCAATTC[C/T]TCTTCCATTCTTAAGTTAAGTAGTCTCTCTTTCTCCTCATATTCTATAGC
233	CTCTTGCTGCAAACAATGACTCTCCCGTTGCTCTCTTCTCCATCATCTT[A/C]TCTCGCTTAAGAGCGGTTCAGACGCAGCAACTGCAACACAAACGAAGAGA
234	GAGCGAATGCCTTCACGGACGGTGAGAAGAGCAGAATGACGAACAACTC[A/G]GCAGCCTCTTCCTCACCTTTGAAGCCAAAATCTGTATGTATCATTTTGTT
235	CCTTAACAACAACAAGCGGGTCCTTGTGAATCAATTCTGACCCATTGTA[G/T]CCTTCCCTAAGCAGCACAGTATGAACCTGATATTTATTAGCGACGTAGAA
236	TGCTGCGTAAATCAGAGCAGCTGCTGAATCCTCAGAAAAGAAAGCAAGC[G/C]TATGAGGTTCTCATGTCATTCTATGGGGCTGCAGGTAAGAAAGAAGAGGT
237	TTGGGATATCTGAGCTGCTATTTCGATATTACAGTGCTTCTCCATCTCA[T/A]ATATTGGAGCTGAAATAGAACACAATTGATGGTCAGATGTTGCAGCATAG
238	AGGACAGTGTCGTCAAACAGCAACAACAACAGTTGCAACAGTAATAATA[A/C]TGCAGCAGCAGCTAAGGGGCGTATGCGTTGGACACAAGAACTTCATGAGG
239	TTCTTTCTTCATGGTTCTTGAGCAGCCAACGGTTTCACGGGCTCTCGTC[T/G]ATCTCATCCGGAACATGCAATTTCTCCATTGCAGCCTGTTTTAGACAATA
240	GCAGCCTGTTTTAGACAATAATAAGTACTTAAGGACAACATACAGAATC[T/G]AAATCCTCATCATAGTATGATTCTTTTGTTGTGTTTCTAAAAGACTCGAA
241	CCTTGTCGTTAGACTTGATCTCAGGGGGGCCAGATTCTTCACTTTCTGA[C/T]AAAGCTGCTGTGGAGAAACTGCTTTCGCCTTTTAGTTTCAATTGAGGAGA
242	CTAATAGCTGATCACTTCTTCGCTCCACTGAAACTGCTTGAGCAGCTCG[C/A]GTATGAGAATCAACACCAACCCGAGCAACATCAGGGTGATATACCCTCAT
243	GGTTGTCGGTTCCTTTGTTTACTGGAGGGAAGATAGAAGGGGAACAAGG[T/C]GCTGCAATTCATGTTGTATTGTTAGATGTGACAACAGGACATGTAGTGAC
244	CGAAGGAGACCTAACCGAGGAAGTGATCAGAGAGGCTGCAAAAAAGACA[C/G]AAGGCTTCTCTGGTCGTGAGATTGCTAAGCTCGTTGCAGGTGTTCAAGCT
245	GGCTGATTCACTTGACCGAGCTGTGGTAAGCTTTTTTATGCATTATGTT[A/T]TTTCGCAGCCACTGTTTAGCCAGTTTGAGTACCTCTGTTTCATTAGCATT
246	GACCACTGTTGCGTACTGCTGCAGCTATTGGTCTTACCTTAGATGTCTC[T/G]TCATCTAAAGCTTTGGCTGATTCACTTGACCGAGCTGTGGTAAGCTTTTT
247	GCGGTATTTAAGGTATCATACAACAACCTATCAGGAGTCATTCCACAGG[A/G]AAAACAGTTTAACACCTTTGATACGCAAAGCTACTTAGGTAATCTACTTC
248	CAGGCATTACTGAATCAGCAGAAGGAAGAAACGAACTCTACGATTTCGG[T/A]GATGTAGAAGCTGCTAGAAACGACGCGATGAATTTCGCGTCTCGTAGAGT
249	CTGCTAGATCCAGATGAGTCGTCTAGTCATGCAGTGATGCTGAGCTTTG[G/C]TTGGATTGCAGCTGATTATCTTGCAAGAATCAAAATCCGTTCAAGGGAAG
250	CTTTTGCTAATCTTGTTGGTTAAAGATTCACATGTTATGATGTTGCTAC[G/A]TTACAGGAATTACAAGAAATGAGGCGGAAAAACGCTGCCCTTCAAATGCA
251	GACCTACTGCAGCTGCAAGAAAGACCACACAACATATGTAATGTAATGA[T/A]ACAACGATTTGATGAATAGCATTTTGTCTTATTCGTTTTCGTGGTCTTAC
252	CCTTCGGAAGCTTGTGCGTTCTCTTTGCCCTTTGGAACCTTTGATTTTG[C/T]TTGCCCTCTTCTGCAGCTTTTGCTGCTAGAGTCTTCAGTTTTAGAACTCA
253	TACACGCCTTTTGCCAGCATCCTTTGGAGCTGCAGATGTCGCTTTAGGA[C/T]TTAACCAGCCTTCGGAAGCTTGTGCGTTCTCTTTGCCCTTTGGAACCTTT
254	AGATGTCTTACTCGTCCAAACCATTGTTGAAAGCAGCAAAACCATTGTG[T/C]GTGTAAATCATCGAGGCAAGCGAGTGAAATTGGTAACCATCAACTTGATA
255	TGCTTCTGGTGAGAATCTGGTTGTTTTGAAACCATACTTATTAGACCCT[G/T]CTTTGTATCTCAAAGCTCTGAAATTATGCAGCTACGAGAAACTAGTTTTG
256	GACGTTCCTCTAAAGGCCGTACAGGTTAATTAATCTTTCGAGTACTAAC[C/G]TTGATGCTTTCTGAATTGGTTGAACTTTTAAGACACCGTAAAAATGGAGA
257	TAGGATTACAATGATGTACACACAAGAACCAAATCGAGATTGCAACATC[A/G]AACATTCTAGAGAACAAGAGAGGGCTGCTCCTTGAACGAAAACCCACACT
258	ACATCACGGCATACCAAAATAACAATGGCTAAAATCACACTTATGGTCA[G/A]CGAATAGATATTAACGATGATTACCGAAAACGCTGCTGATTTAGGGTTCC
259	CCACCAAGCTGCTGCTGAATAAAGACTGTTTTGTATTGACTATATCGCT[T/G]TCTTGTCTCGTGTTTTTGTATTTGAAGTGCCAAGACTTGTAAAACTTCAG
260	AACTTGTAAGAAGAGCCCATACGGAGTCATCACAACGTCTCGGTACCAT[G/C]TCAAGTCATGCTGCGTCCACTCTCTGTACAATGAGTCAACTGTCAATGTT
261	AGTTGATAGTGTCTGCAGCTTTTGTGTCTTTCTAGAGCCGTTGGGAAGC[G/A]ATGGTTTGTGCTCAAACTCAACAGTCAAGAGACCCAACATAGTGGCTAAC
262	TCAACCCACCTAGGAGGACTGTTTTTGCTTTGCGTGAACCACCACGTAT[A/T]AGCCGACCTCTCATTGTAGTAGTCAAAGATTCTGGCTGCTCGTGGATTTC
263	ATCCGTATTGGTTTTGGTTATTAGTCGGATCTTCTCCGTCTGATCTCAG[C/T]ATAGCCCAAGAAGCAGCTGAGGAAGTGGAGGAAGAAGCTGCGGAAGAGGA
264	GCACATCTGCAGCCTAAACTTGTTCCTCCACGATCTTCAAGCCAGTCAC[T/A]GCAACTGTCAAAAGCCTTTCCTGGTGTTTCATCTCCGTCCCAACAACATC
265	AAGGATAAACGTAATCTTACCCGTCGGTGGAGCTGTGGAAGAGCACGGT[A/G]GCGCTGCGGAGGAGGACAAAGGGGAAAGCAAAAACCAAGTGAAATGAACG
266	CTGCCTTGGGTGCTAGCCTTTGGACGCAGATCCAATGTGGATGAAGCTG[T/G]AACTGAAGACTCTAGAAGAACCCTCCTGATGGGAGCAGCCGTAGATGTAG
267	AAAGCCGTTGCAGAATCACTTGAGACAGGAGTCGAGGACGTCGAGATGA[A/C]ATAAGCTGCTGCAGACACAGAGCCTGCGTCTCTGACAACGCTGCCAGCAA
268	GTTTGTTTTGCAGCTACAAGGAGGCCATGATCATGGAAGTTGGTGCAGA[A/G]GAGAACGGTTGCAAGTGCAAGTGTGGCTCTACCTGCAGCTGTGTCAACTG
269	AAATTTAAAACAAAAATCAAAAAGAGAAAACAAAAAACAAGAACAGAGC[G/A]AAGAAGAAATGTATCATAGTGTGTGTGTGTGACTCACATTGAGAAGAGCA
270	GTACATCAGTGGCAGCTTTGCGGCATCTCTGTGCGCTTTTAAAGATTCT[T/G]GGACTCGATGTTTGCAAACTCTTCTCAGATATGAAGCAGCGAGCGCGGTT
271	CCCAACAGAAGTTTGGCTGCTCAGCTTGCTAAAGCCGATCCCTTCAAGA[G/A]GTCTCCTCTCTCTGATATCCTGGATTAAGCGCTACGCAGCTACTACATCT
272	ATTTCTAAGGGCAGCTTATAATTAGAGGTTAAAAAATATTCTGAATGAG[G/C]TTCATTATTATGAACAGGCATGGGCACAGTTGGAGATACAGCAGGAAAGA
273	TGCACTACACATTCTGCGGTACTTGAAGAATATTCCAGGTCAAGGGCTC[C/T]TCTATTCTTCTTCTGCAACTCTTTGCTTAAATGCATTTGCAGACGCAGAT
274	GTTAAAGTCGAATTGCAGCGTTTGGCATGACACAGCTATTCCATTTAAG[A/C]AAGTTATCGAGGAGTTTGAAGCCTGGTTAGCTGAGCATAGCTTGTGGGGT
275	TTGTTGTTCATTGGAGAAGTTATCAAAGCTTTTGAGGTTACCTCCAACT[A/G]TTGCTGGTGTTACTTTGCTTCCACTTGGGAATGGAGCACCAGATGTGTTT
276	CTTTCCAACTCCATAGCCTGGAGAGTCCTATTTTCCCCGTTTTTTACCA[G/A]TGCCTCAACAGAAGGAAACATGTCCATCCCAGAAAAGGGGCATAAAGTTG
277	GTCTGATTAGAGGTATATCAGAAAGTCCAGGGTTGTAACTCCCTTTTCT[C/G]CCTATGTTCCGAGGTAGTAGTGTAGTGCAGCGTTTAAGTGGAGTTTCAAG
278	TGCCTCGCCCTTGTTTGTTATCGTAAGTTCCCAAAAATGTCAACCAAAT[T/C]TTCTCATTTGTGCAGCTTTCTTGAATCTTGATTGCCTGACTTGTCTGGTC
279	CTTCATTGTATTCTAGTAGTTTTTGATTTGAGTTGAGGCTTGTTGTTAT[C/A]TGTGTCCTACTTCTGAAGTTGTTGGATTTGTAGATGGCGTTCCTTGGGTT
280	CCAGGATATTGCGGTCCCATCTGTCAATTTTTACGTGGTGAGTTTTTCA[T/A]GACATATTTCGCTTTTCTTTAAGAGTAAATTTAGGCTGTATACAAAACAC
281	AGGTTCTTGTTTTAGAAGCTAGGAGTCGTCCTGGTGGTCGAGTTTATAC[G/T]CAGAAGATTGGAGGTAAGGAGAGTTTTGCAGCTGTTGAACTTGGTGGTAG
282	GCAGACATGATTCTTTGCACCGTTCCGCTAGGTGTCTTGAAGAAAAGAT[A/G]TATCAAGTTTGAGCCGGAGTTACCTAGAAGGAAATTAGCAGCCATTGACA
283	TTTTTGTTTGTTTGGTTGGTTGGTTGATTTAGTAGTGCTGCTAGTGCGG[G/C]GAGTAGTAATTTGGGGATGAATCCTGATGGGTCAGCTGCGAACCCTGCAG
284	GTTAGAAGTTTTAATTAACAGTAGCTGCTTCGGTATGCTACAGGATCAA[T/C]GAAACAGCTTAAAAAGCAGAGAAAGAATGATTCCAGATGCAAACCGCTGC
285	GGGACTTGAGTAATGGTGGTTTAGCCAAAAGTAAAGCAACCTTGGAGCG[C/T]AAGAAATCAAAGAGTTTCAAGGAAGGAGAGAGTTTCCCTTCTTGGCTCAT
286	TCGTCCACCACGGCCCCTTCCTCGCCCTCTTCCTCTACCGCCCCTGCCA[C/T]CGGGCTTAGAATTCCCCATCTCCTGCTGCAGTGATTAGCACAATTCCAAC
287	CTTTTTTTCGAGCAGCTTCGAATTCTTCTTCGTTTGGCTCAGAGTCAGC[A/G]TTTTCACCATACTTAGAGACAAGTGACGAGAACATTGTATCGAACTTGTC
288	CTTACCAACGAGGTCAAGCTCTTCAATCGCTGGACTTATGAAGACGTTT[C/T]GGTAAATTTCCTCAACGACTCAATCTCTTAATTTTGGTTTTTTGAAACCA
289	GATGTAAGTTGGTTTTTTACGTGTTTCGCATTATGGGGAAACCTTTCTA[T/A]CTGCAGCTTCCGTACTTTTGTCAGACCAAATTTGGTATTTGATTGAACTG
290	AGTATAAAATGGCGATTCAATGGGAAAACTACTGAGGATTACCAGTTAT[A/T]GATTGTACCTTTAGCTGCTGCTGGGTCATCCTGTGGCCTCATTGCCGGGA
291	AATCCTTTAGATTAGAGTAGAGACCGTAAAGCGAGTACTGCTGCAGATT[T/C]GCAACCTCGTACCATGAATTCATCGCGGTGTAGTGCTTATCCGTACCTGA
292	TAGAGAGATAAAAATACAAGCTGCTGAAGGACGATTGCTGGAGAATCAT[A/G]CTCCTGAGAATGCCGATGAGTTTGAGAAATTGGTTAGAAGCTCTCCAAAT
293	GGGGATGAAAGAGCGATTAGAAAGCGGGATTCGAATGATAAGACCATGC[C/G]GGTCACCAATACAAGTGGTCCAAGCCGTTGATCCAGTGCTGGATGCATGG
294	GCAGTGTCTTAGTTCATAGTGGAGGAGTGCATGGAGGGCACTATTATGC[C/T]TTCATTAGACCAACACTTTCAGATCAGTGGTATGTATACTTCTGCCGTCT
295	TACGCACTCGCTGCTGTTCCTTAGAAGGAACGAAATCACTCGCTTTCAA[A/G]CGGATCGTATACGAAGGACAACATGTTTTATCCATCTCAGGTTTGTAAAC
296	GCTTGGGAAAGATTACGATGATGATTCGAGTGTAGACGAGGAGAATCAA[A/G]TGCAGCGTGAAGAAGGGTCTGTGAATCGTAGGGGAGCTTTAGAGAGGAGG
297	AGAGGCCTCCTATTGGAGTTGCTATATGTATCTCTGCTGCTATTGGAGC[T/C]CCTGCGGTTGCGGGGTTGTATACTATACTTAGTCCGCTTGGGAAAGATTA
298	CCGCAGCTTTGATGAGTAAACCGAAGAGACCAAAAGGGTTAGAAAAGAA[C/A]GGAGAATGGTCACTGTCCAGCTCGTGAGCTTGGTTCGGTGGCCACTTTCT
299	ATCTGATTAATATCGTCTTTAGCATCTCAAAGAATTATTGATGTTATGT[T/G]TTTGGTGTTCTCGTGGATCAATATAATTGGAAAGCTGCAATGGAGTTGAT
300	ACTAGCAGCCGGAGCTGTTGAAACAGCACTGAATGAAAAAACACTGCTT[T/G]CAGTACTTGCAGCAACACTTCCAGACATGCTACTACCAGGGCCGGTAAAT
301	GGATGCATTGCCTTCACGGACCACCTTTCCCCTGATCTTCTTCCTTTTT[A/G]GTATCTGCTGCGGTGTTTTAATTTGAGCTGCCTTCTCTTCTTCTATTCCT
302	CTTACAAGAAGCTTGCTTTGCAATGGCATCCTGATAAGAATGTCAACAA[T/C]AGAGAAGAAGCAGAGAACAAATTCCGAGAAATCGCGGCAGCATACGAGGT
303	CACTATTGATACTCGGAAGGAGAAATTATGGAGCTCCAACTGAATTTGC[A/C]ATCGCTCGCATCGTTGAAGCTTCAATCGGGCTGCTCTGTTTTGCCTTTGG
304	GAATCATCAAAGCTGCTTCATCAAACAATTTATCTCTGAGTTCACCTGA[G/T]ATTCGATCTCGGGGAGAAGCTGTATATAAATTAGTCATTGACTCGACGAA
305	GATCTGCTTCGGGACTTCATTTCTACGATCTATCTGGTGGTCGTTACGT[T/C]GGATCTACTCACTGGACGGATCCGGAAGATCCGAGAATCCATAAGGCACG
306	TCCATAAGGCACGAGTCGCTGCCGTTACGGATTCTAGTAATGGAGTGTT[T/C]GCTTCGTTCGAGTGTATGCATAGAGAGAATAGTGTTCTTCAGATTGATAA
307	CATTCCGTCCCATGTTTTCATGAGGAGCAGCTCTTACTTTATGTGAGAT[T/C]TCCCACTGAGCATTTGCGTCAGTGTTCCCGATGAATACAACGACAAATAA
308	CCCACTGAGCATTTGCGTCAGTGTTCCCGATGAATACAACGACAAATAA[T/G]AATAGAAGTAGCAGAAGTCGTTTGCAGCCTGAATGCATCATTTTGATGCT
309	GTGCGCAGCCGATAGATGAGTTTATGTTTCTGCAGAAGTTTGTCCAGAC[T/G]AGATCTGATTTAACGTCAAAGACGCTTATCAGGGCTCATCGAGTGCAGCT
310	ACACTGAAGAAAGCTTAGAAGAGTTGGAGAAACTAGCTTTTGTTTGCTC[A/C]TGTGCAGCAGAATCTGCTGATGCTGGTGGCTCAACCTTGATAACGATTAC
311	GCAGCAGAATCTGCTGATGCTGGTGGCTCAACCTTGATAACGATTACTC[A/G]AATTGGGATAGTTCTGCAGCTCCTGGAGCTAATGTCAAATTCTCTTGAAT
312	TTGAAGAATGATAAGGATCAGTTTGTCAACATTGACAGTAACAATGTGG[G/A]TCCGCAGCTCTGTGCAACATTCGCTTGTGACATATATCAGCATTTGCGTG
313	GTCTTTAAGTGTGTTGAAGTCGCTGAGTCATCTGTCAACTCAGTGGATC[T/C]TTCTGTATACGTCTCTGTTGACTCCAAATTGGTCTTGGCCAAAGATTTAG
314	GTTAGATAAGAATCTGAGACTTTGCTGCAGCGCGGGAACATTTGGTACG[G/T]CCTGATTTAGTGAGTGCACAGACACAAGTCTCTAGAAGCTCAAAATCTTC
315	GGACACACAAAACCCTTCTCATTCGTCTCCAAAAACGCTAAATCTTCTC[A/G]ATCGCCTTACCGGCGATGAGAGCTATTTCGTTTCTTCTACTACAAGAAAC
316	ATTTCGTTTCTTCTACTACAAGAAACGAAACAGTGGCTGCAAATAACAA[T/C]GTATCCTTAGAACTGACTCTATCCACAGGACCAAAGACAATATGGGATAT
317	ATTCGTCTCCAAAAACGCTAAATCTTCTCGATCGCCTTACCGGCGATGA[T/G]AGCTATTTCGTTTCTTCTACTACAAGAAACGAAACAGTGGCTGCAAATAA
318	TTCTGCTTTCGCGTTTGCAGCTTTTAAACCATCCTCAGCCGCTTCTTTT[A/G]CATCTTCTGTTAGACGCAGAAAAGTTTGAAGCTCTGATAACTTCCTCTCT
319	ATGCGGAACGTTTCCTTCTTATCTTTGGTGGGGGCTCACATGCAACCTG[T/C]TACGATGATCTACATGTCCTTGATTTGCAGACAGTAAGTTAAGCTAAGAG
320	CATGTATATTTGATCCACAAGGCCGTGCTGGTATATGCGGTGACTGGCT[C/T]CTCGGTTCCAACTTAGAATCTGCAGCTTTAAGCGGCGAAGCCCTAGGAAA
321	CAATGTGAAGAACAGTGTTGTTTTGTGGTGTTACCTTGTCGAAATCTGA[T/C]TGATGAAATTTGGTAAGATCAAGAAGATTAGTGTCCCCTGTAGCTGCAGC
322	CGTGAAGATAATCTGATCAGGATGTACACCTTGGGCAGCAGCATCTGGT[A/T]ATAAGGTCAGAAAAGTAAGGTTATACGAAGTGATGAAAGCAGAAAGAACA
323	GAATGTCCTTCCGTGTCCCCACTGTTGATGTTTCAGTTGTTGACCTCAC[C/G]GTTAGACTCGAGAAGGCTGCAACCTACGATGAGATCAAGAAGGCCATCAA
324	GTTGATGCTGCGAATCAATAAGAGAATCAGAGAGTGGCTTACAAAGAGA[G/A]TGAATCACATTCCTTTTCTTATCTTCCCGTGTTGCAGGATCAATTCCATA
325	TAACATCTGCACCAAAAACAAAAGGTTAAGCAATTTCGAACTCGGTTTC[A/G]GAATCAACTTCAGTTATGAGACATAGGAAGATCACTATTACCGATAAGAT
326	TCCATACTTTGCATAGAATAACCAAATCAAGCAGCTAAATCCTTCACCA[C/A]AACCTCCTTACTCTCATCTTTAACCCCCAACTTCTTCTGTTCCGCAGCAA
327	CTTCTGCATGGCAAGAGAAAAGTCGCATATTAGATGCTTGAGAGAAACC[C/G]AAAAGAGAAAGCAGCGGAAGATAGAAGACTCAATGTGTGTCTACAAGACT
328	CTAGTGGGGATGGTTCTCAGAATGATTTTGGCTCAGAAGCAAAAAAACA[G/A]AGAGTTGAAGATGATTCATCAGATGGAACTGCTGCAAATGGTTCCTTATA
329	CCATGCATGAAATGAATGTTCGTGGGGTTTCTGATGCTGCAGCTACTAT[G/C]GAAGCCTCTAGTGGGGATGGTTCTCAGAATGATTTTGGCTCAGAAGCAAA
330	CTAAAGGTGGCTCAAGTGGTTCTCCTGTCATTGATTGGCAAGGTAGGGC[G/A]GTAGCCTTGAATGCTGGCAGCAAGTCCTCAAGCGCATCAGCCTTCTTCCT
331	TTGCTTCTGAGCCTGACGACTCCACCATACATTCGAAAGAAGAAGCAAC[G/A]TTGTTAAGGAAATCCTCGGGCGGTGTTCGTGGGACTGCTCATGGGAGCGG
332	TTTCAAATTCATCTGCATTGCTTCTCATGTGTCAAAGCGACTTATTAAT[C/T]AGCCGGACTTTAGATCTTGTTTCTCTTCTGGTCTTGGACTGATTGGAAAC
333	AAGCAAGGTGGGTTTGGTGATATCTTAACCGACCAAAAAGTTGACAAGA[A/C]ACAGCTGATTGACGATGTGAGGAAGGCTCTTTACGCTTCCAAAATCTGCA
334	GTGCGACGCTAAAATGCATTTCGCCATCAGCTGCTATGTTTAGATCAGC[G/A]GTTATCAATGCTAACTACCGTATCTCAGGGACTCATGTGAATCCGCTCGG
335	GACCGCTTCCAACAGATTGGCCGTAGAGGATAACATCTTCCTGCTTAGA[C/G]CCGTAGGAATCTTCAAGACACTTATAAACAGCTTCAATATCAGCATATGT
336	TGTTCGAAAGTGCAGACCAGTGCAAAATGCTGCATGGAAAACTCCTTCA[A/T]AGAGGATCCAAGACTGTTCTTGGGAATGCCTCTAATGAGAGAGAGCTATT
337	TGCACCAGAAGAAATTCTTCCAGAATGGCCTGAGCCGATGCATGTCTTT[T/C]GGGTTCCCAAATTGAAAATCTCACTATCTAAAGGCTTACATTATGCTGCT
338	AACCACTGCTACTACTCGGTCCATTGCAAATACCGAGCCTGATGATGAA[G/C]GAGGCGGTGCAGCCTTTCTCTAGTCCTTCACTTTCTATCCATATGTATCC
339	AATGGAAAACATGGGCATCATGTTTTATACAAGCAGCATGGAAGAGACA[C/T]TGTAGAAGGAAGATCTCGAAAGCTTTACGTGAAGAAGAAGGCAAACTACA
340	TTTCATCACAACCGTTACGTGAAGCAGCGTCACGGCTTCTACGTCGTGC[T/A]ACTAGTCACAGGATGATGCTTCGTGAGTCATCGGTTAGAGTCCGTGAAAT
341	GCTTTGCAAATTCTTCGACTACTTCTTCTTCTTCTTCTGGTTCTGCTCC[A/G]TCGCTGTTTGGATCATCTACGGCTGCTCCTAACTCTTCTCCTTTCGGATT
342	AAGCCCCTGGTTAATGGTTCTGGGCTGCATCAATAGCATGTTAGAAGAA[G/T]ATAGGTTTCTTGGTTCGTTTGGTTATTGCCAATCATGTGAAGAAAATCTG
343	GAGACTTTCAATTCCAGCTTCAGGCTTAACAGAAACAGCTTTACAAACA[G/A]CAACATCGCTACACTTCTTGCTCTGTCTCTTGACCACGAAAGCAGCCGGA
344	AAAGTCGAAAGTCGCCGACTTTCTTGAAGATAAGGAGACAGAAGAGAGC[A/T]CCGGCGAGTATTTGAATGGTCGGTGACGAGAAGTTAATGGATTAAGAAGA
345	TCCAGCTTCAGGCTTAACAGAAACAGCTTTACAAACAGCAACATCGCTA[C/A]ACTTCTTGCTCTGTCTCTTGACCACGAAAGCAGCCGGAGAAAAGTCGAAA
346	CGTTGTGTGTGCAATACGAAGCAGAGTTTAGGCCAAACATGAGCATTGT[G/A]GTAAAAGCTCTTCAACCGCTCTTGAGGTCAGCTGCTGTTCCTCCACCACC
347	CGAAATGAAAAGATATATGAGGTCCGATTGATAACCAAAAACAGTACAA[G/A]TTTTTCAGCTGTAAGATGTGACTAAGCATCGGCTTGCAGCTTTTGGCATG
348	TCCTGCAAGATACCAAATCGTTAAGGTTCTGTTGTGCCTATCTTGGTAC[A/C]GAATCCGGAAAATGATGGAAATGTACCTTATATCAAATTCCTCAGATTTT
349	GTACCGCAAAGCAGCTCTTAGGCATCACCCAGACAAGGTGATCTGTGTT[G/T]TACTTGTTGACACTGTTGCAAATCATTAGTCAATATATGCTGATGTTTCC
350	GCAGCACAGAGGAAATCTACCATGCCGAGAGAGTACTTCCTAATGGAGA[C/T]TACTACACGGGGCAATGGTATGATAGCTTTCCTCACGGGCATGGAAAATA
351	TGGTTCAAAGTGTTAATTATTAACATTAAAATCACACGTGCAGCTAAGG[C/A]TGAAGTGAAGCCAAATGAAGCAGCCGATGTCATAGAGACACAACAACGTG
352	TATGACAGTTTTGCGGATGGAATTTGATATTCAGAGGTTCTTGCAAAGC[C/T]CTGATCAGCAGCAATTTGAGTTCCAGCATTTTCCAACATCATATCTCCGT
353	AGCAGCCTTCATTAACTCAACGCTAAGATCTGGATTCTTGACAACAAAC[G/A]ACTTGAACTCAGCAGAGCTACATATCGTCGTCATATACCTTATGATAAAT
354	TTATGGTGCTGATGTAGAAGGTGACTTGCTCACCACTGGTACCCCTATC[T/A]GCTGCCCTCCAGTAATTGACATGATAAGTAATGATCCAATACTCCGTGGT
355	ATGGAGGATGTTCGCTTTCTCCATCGAACTACGCAGCACTCGAAGGAAT[T/C]TTATACTGCAAACACCATTTCTCTCAGCTTTTCAAGGAGAAAGGAAGTTA
356	TTCTCTCAGCTTTTCAAGGAGAAAGGAAGTTACAATCACCTCATCAAAT[C/G]CGCTTCCATCAAACGCAACGCCGCTGCTGCTACAGCTGCAGCTGCCGTAG
357	GTCAAAAGGGGTTTGGGCTATCTCAAGGATGTTAAGAGCATTCGACGAG[T/C]CAAGGGATGATATCAGATGGCTTCTGCATATGTCGCGTAGATGCGGGATC
358	CCCAGTTTTTTTTTCTTCAGCTAAAATAGAGGGCGATGAGGGCTCAGCC[A/T]GCGTATCTACGACCATAGCAGCACTTGTCTCACTGTTGCATGTATTCTCA
359	AAGAATCTAAACAAACCTCTCTGCATATGGGACATTTGGAACGTTGTGG[C/G]GCAGCTTTAACGCCTTGGAAAATCATTACTGAAGCAGCCGAGCATGCACA
360	TGAGCAGCAGCAGCTACAGATCCAAATACCATAAGAAGCCAATCAAATC[T/G]ATCAGCACAAGCAAATAGCTGAGAGAAAGGTACAGCTGCAGGAGGAGGTT
361	TTGATGGAAGCCAACCGCAGATATCTTCATATCAATACTCAACTGGATC[C/G]GACGGTACTTCATGGACAGCAAATCAGGCTGTGGAGAATGGCAACTATTC
362	TAGCTGCAGATCTGACCCGTGCTGTATTCTTTTATTGATGTTCTTACCA[T/C]CGTCTTGCACTGATCTGCTTGGTGCATTCGTAGAATCTCCATAAACAAGG
363	GGAGATTCCTCTGTGACCTTCGTCTCCGATAATCGTTGTTGCAGCGTTC[C/G]TGATACCTAGTTGATCAATCAAAGCTTGGACACGAAGCTTCTTCTTCAAT
364	TGCTTACTGTCGAAGAAACCTTAATGTTTGCTGCTGATTTTCGTTTACC[G/A]AGGAGTTTACCTAAATGGAAGAAGAAGCTTCGTGTTCAAGCTTTAATTGA
365	TGGTGCATCAAGATCTGCTGCTTTGCCTGGCTTTTTTTTAATGTACTGC[A/G]GAGTATTCCCCTGTAAAGACACAGCAGGAGAGGGCTGCATTGCAGTAGTA
366	CATGAAAAACACACAGACGCAGCAATTTTCCAGTAATGCATTTACCATA[A/T]ACCAAAACTACAGATCTTGTAGAACCAAAAGCAACATTCTCTTCTAAACA
367	CCATCTGCAGCATTCAAAGTAGACATCGAGGAATTCAACATAGATCAAC[C/T]ATGAATCTGCTATGGCAAGAAGTTTCCTTAGCACAGAAATTAAACACAAT
368	CCCCTAAAAACTCCCTTGAGAACTACATATGGTCCATCACAGAAGATAC[T/A]AATTTTTCCAAAACCACTACATATGTTGCTGCAACTGCAAATGTTGATAT
369	CAGCAATCTTGTGGAAGACTTCCAAGGCTGCTCCTGAGGTTTGTACACT[G/T]ATCTGCTACTTGTTTAAGTGACCGTGTCAAATCTGGTGTCATAATTAAAT
370	AGAGAACTTGGTATTATCTTAATACTCCCCCGCAAGTTTGTGCAGCAAA[G/A]TTTTTGATGCCCAGCTTGAACAAGAGATATTGAAATGTTGAAGTAGGTAA
371	GTTTGTACACTTATCTGCTACTTGTTTAAGTGACCGTGTCAAATCTGGT[G/A]TCATAATTAAATGAAACTCTTGTACGCAGGCTGCTGAAAAGCTTAGAATT
372	CTTTGAGCCTCCTGGACTCGACGTGTGCAGCAATGGCGCAGCAGAATAT[C/T]GATAGGATGATGGAGACTGGTATACCGTATGGTGTTTTAGTTTGTTTTGG
373	CCCCAACAAAAATAAAGTTAAGAGAATTACACAAAATGTGACAATAATT[A/T]AACAAACTCAAGAGCAACACATCCTATAACCTGTTTGTAGCAGCAATCAC
374	ACACCCCTGAAAATTTTCTAAAATCAGAAACCTGTTTTTGCCTCTGAAT[A/T]CATATTAGAAACCACACAAAAAAGGTTATAGCATTGGACCTGCAGCAACA
375	ATATTAGAAACCACACAAAAAAGGTTATAGCATTGGACCTGCAGCAACA[C/G]CATCAACATCACAGGTAACAAGAGCGAGATCAGGTTTCTTCCCAGAAGCT
376	TCTTTGCAGCGTCAAGTGGAGGTGAGACTTTTCTACTTCAAAAATTTTG[G/A]TTTTTGCTTAGGAAACAGTAAGCTAAACAATATGCAATAGAATTGGTACC
377	CTCCTTCACTTGGTAAAGCTACGAGTATCGATGCTATCTTACAAGCTGC[G/T]GATGAGATTCAATCTGAGGATCCTAATGTCGCTAGAATTCGTAAGTTTTC
378	GCGGAATAATGGCGCTTTTTCTTGTCCATGCTGCTCTTGGCCTTCAGCT[C/T]GGTCTCAGTACCTGACTATTCTTTTACTGATCTCTTCTCAATATGTTTGT
379	ACCTGTTGGAAGATCCCTTAGCAGCATTGATGAGTTCATCAGCAAGGCA[T/C]TCAGCAACAGTCTTGATGTTCCTAAACGCAGCTTCACGAGCACCAGTGGT
380	TAGCAGCAGCGACTCTCTTCTTTCCGGCTCCGGTAAGCCTCCGATCTCC[A/G]GCTAAATTTCTTCGCCGTGCCTCCAATCATCATCTGTTCCTCGTTACTCT
381	TCAGGAATGATCTTGAAGCAAAGAGAGCTGCAATTGAAGTCAATTGGTC[T/C]GGTCGCCTTTTTGTTCTGGATTTCTTACACATGCATCGACTAGACTTGGA
382	ACTCTTTAAATGCAGTTTGTGTCAATCCAGCCTCTGAGGTTCCAGTTGA[G/A]GCGATGGTCGAAGTGTTATCTATTGCGGCTGCTCAGTTCTCGGTGTATGA
383	TTTATAATGAACTTGTAGATGGTTTGAGAGGAAGTGATCCTTCCATTGG[A/C]TCTGGTTCTCAGGTACATCTTTTTCTTTTTCTCCCTCTTCCGCGTTCTGT
384	GCAGCATCAATCCCTCTCCAACGGTCATCACTCTAGTGAAAATCTTGAC[T/C]CAGAGTTTCAACCACGTGTAACCGCTGAAGCAAGCATCAAATCCTCAATG
385	ATGGTGCTGCTAGTGATGGAGGAAATGTTGTTCAGATTGTCAAGCCTTC[A/G]AATTGGAAGACAAGGATTTGCAATAAGTGGGAGATTACTGGGTATTGTCC
386	CTCTTCCTTCAGGATCCGCGAAAACAACCCGAGCTGAAACCAAGTTAAA[A/G]TCAGCAGCAGTGAAAAACTCACGGAGATGGGTTGATCTTGCTTTCCAAGC
387	TACAAGGGAGGATGACCACACGAGTTGAACGTCTGATCCAGTGGAAGAG[A/C]CCAGACGCCGGTTGGTTCAAGCTAAATACAGACGGAGCTGCTCATGGATG
388	CAAAAGCTGCAAGTTGGGCCAGACCCGCTTCAGAGAGACACAAACCCTA[G/A]TAGGTTTGGTTTTGCGGCGGAGGCAGCGGTATACACCGGAGCCCCAATCC
389	GCTGCAACTGTTGCTGCTAAGCCTAAGGCAGCTGCAACAACTGTTGCTC[G/C]TAAGGCTAAAGTGACCGTTAAGCCTAAATCGAAGACTGTTGCTGCTGTTT
390	GGTAGAGATCAGGATTAGTATAACCTTGGTTAAAAAGCTGCCTTTTTTC[A/G]TGGTCCAGGTCAAAGTATTCTGATGTCAACCGCATTGAGAGACAATGAAG
391	TGTCGAGCACGCTGGCAGCCCCTTAACTCAACACCAACAAGCTGGTAAC[T/C]ATTCGGACCAGTACACTGGTATGCCTGGCACACTGGCAGCCACTCCTACC
392	TCATCATCAACCAGCACCAGCGTCATCAATAGCCTCAGCAGCAGCAGCA[T/A]CAAGGACTCTTCGGCGTCACTACCAGACAACATGACCAGCAGCGGTAGCA
393	GAGGAATTTTTGGAGCTTACTAAAAGTGCATTACTAGCTGCTCTTGAAG[G/C]TAGATTCTTACAGCAGGGGTCTTACTTGTTTTAGTCTGTCTTCTGAGGGT
394	AAAAAGAAGCATCTCAGTGACAAGCAGCTCTTGCTAACAAAAAAAAGAA[A/G]GGTTTCAAGCTTCTGAGACTATTTGATTCACAAAATTCACCTGCGACTTT
395	TCAGCGTCTTCGTCTTCATTCTCCTCAGGTCCATGAAGATCAGGAGAGG[C/T]AGTTGCAGCATATTCTCCCCCTGCTTGGTAGCACACTTAGGTAAAAAAAA
396	TAGGCTTATCAGCAGGAAGCGCTGACAACCGAGATTCTGCAGCCACATA[G/A]ACTTTTCCATTGTACTTGTTACGAACCTTCAAATAGACCATCTTAGCATT
397	CCAGACGTGCGCAACTCTCTACAGACGTGCGCAACTCTCTACAGACGTG[C/T]GCATCTCTCTGGGGTGACGTGTGTGGCTCTCTGCAGACGTGCGCAGCTTT
398	ATCGGTGCCACTGCCTGTCATCGGTGTCACTGCTCAATGTCATCAGTGC[C/T]AGGCAGCCTTGGTCTCTGCAGCACCTCTTGTTGACTCTGTGACCTCTCCG
399	AGACCATCTTAGCATTGACACACAAAGCAAGATTGCTTGGAAGTGTCCA[A/C]GGAGTAGTAGTCCAAGCCACAAAAGCAGCATTATCTTGATCACCAATAAT
400	TCTGCAGCAACCTAGTACTGCATTTTAGGTACAATCATGTATGTACTTG[T/C]GTATGATCTTGTAACCAATATCTTGTCTCTATGTGTGTTTGCCAACTTGG
401	GACTGAGCTTGAAGGAGGATTAGGCCATGAACCAGGAGCTGGTTGTTGC[G/T]GATAAGGTTGAGCAGCTTGAGGGCCATGGTGGTAAGGAGGATACTGCTGG
402	GAAGGTGATCAACATGGTCGGCTGCGTGCTGCAACTTTACGAGCATGTC[G/A]TCGATGTACACCTCCATGGTATCGCCGAGCTGGTTGGCGAACATCTTGTC
403	CACAATATTACCGAGTCTAGCTCATCAGATAGCTTAACTTGTACCGCAA[C/G]CTACTATGTCAAGCCTCAATCATTTATGAAGCGAGTTACTCATTTACCAG
404	AACCGTGCCTCAAGGTCAAGGATTGCGTGAGGAGATTTTGCGGATGGCA[A/C]ATGCTGCCAAATAGAGTATTCACCAAGGATGCAAAAAGATGTACAGAGAC
405	CTTTCGCCTTGAGAAACGCAGCGTCTGTGGTCATGTAACCGCGTTTCAC[G/C]GCGTCTTTTATCTCAGACTCATCTCTCTTACCAACGGCAACAACCTCTTC
406	CAATGGACGTTTTAAGGCAAGCACAATTCACAGGAGCAGCAGCTAATGT[T/C]TCTGACGCTTATACAATCAACGGCCAACCAGGAGATCTCTACCGCTGCTC
407	TACTGGTGGTGGCAGCACAATCTCTGCCTCATCAACATCTTCCCAAAAG[A/G]TTGAACCGTTCATGCCCTCAATTGGTGCATCATACTGCTGCCTCCACCTA
408	ATTCGATTGCTGAGCCTGCCAAGATTACGTGATTCAGAGAAGTTTTGAC[A/C]AGAAGATAGAAACCCTCCTCCATGAATTCTGGAGTCCATTCCAGAAAATC
409	ATAAGCCAAACACTCATTCTTTAGGCAGCAGACCAAACACTGTTCTACG[A/C]CAGAGAGCACTGTATCACACTCAAGCTTTTCTCCTTTCTCCTCTTGTCAA
410	CTCCGCTACAAGCTCATCCTTCCATTCAAGCTGTTCATCTGGTTCATGC[A/G]ACTCCTCTGATTCAAGTTGCTCTTCGGGTTCATGCAGCTCCTCTGATTCA
411	TTACAATCTTTGGCTGCAATTCAAACATCTGGGAGTGCTTGTATCAACA[A/G]ATACGAGCGATGGATGCAGAGTATGAAGCTGCAGATGCATACAGACAGAT
412	AGATGACTATCTCTCCTGCTAGTGGCTATTACATCCAAAGACATCAACA[C/A]CAACAACAGGCAGGGTCATCAGCTGCTGCAACATCTGTTACACTCTCAAG
413	AGAGAGAGAGGATTTCTTTCTGCTTCTTTGTCAGAGATTCCCAACCAGC[C/T]GCAGCAAAGTACTTAAACATTGGACAAGAAAACCCAAACATCAGCAAATA
414	TGTATATTATGTTTACGTCGAGAATCTGTTGGCTGCTGCGCAATGAGTT[T/A]CGGCCTATGACGCAGACTGTTCCACCGGATCCACCGCCAGTGATTTTGGC
415	CAGATACATCAGACAGTGGTTCGATGGCTAGTGGGAGCATGGCACGTGG[A/G]GGTAACATGGGTGGTCGAAACACTCGTGGCCCTAGCGTGAACGCTGCAGT
416	ATGTGTAGTGCCGCCTGCATACTATGCGCATCTTGCAGCGTTCAGGGCA[C/A]GGTTCTACATGGAGCCAGATACATCAGACAGTGGTTCGATGGCTAGTGGG
417	ATGATGACACTGAACATCAAACCAGGCCCAAAATTCCCAGAAACTGAAA[C/A]TTAAAACATGCAAGATTGCATGTGTTTTCGCTGCTTGCACACATGGCCTT
418	ACGACGAAGAAGACGAGCAGCGGTGGATTTTTTTTTACGGTGAAGAGAA[C/G]TGAAAACATGGAGGAGGACTATGACGTCACCTTGTCTGAGAAAGTTGTGT
419	CATAAGGCTCGTATTGAGTTTCAAGAAATGCATCAACTAATTCTCTATA[A/G]TCTCCATCTTGAGCTGCCCTCATGCATAATGGTCTTGCCTGCCAATAAAA
420	TAGAACTTAACAAGTAGTGTTTTATTATACCTGGACTGCGAATAGTCCA[G/A]TCCCTCCTGCAGCAGCAGTCACAAGTACTGTTTCCCCTGATCTCATTTTT
421	TGCAAGCTGCATAGACAAGTAGATACTTCCATTGATTTGCAGCAATCAA[A/G]CAAAACTTGAGGACATAGAACTTAACAAGTAGTGTTTTATTATACCTGGA
422	TGCTTCCTCGGCTCTTCTCTCTAAGCTAACGGACACATGTCCTAACGTG[G/A]ACTCCTCTGACTCGAAGCTCGCTGCTCTTGACGCAGCTAGCTCCGTCAAG
423	CATTCCAAAAGAAGTTTAAGTTTCAACACTTTGGATTCTTAAGCTTAAG[C/G]TATAGAAGAAGCATTTACATACAATGTAAGTGATCTTTTAAGCTGCCATT
424	ATATTTAGGTGTTTTTGATTACACGATTTGTTTTCGATTTTCGTTTGTT[T/A]CTTTTCTTTTTCACCTTCATTATTTTGAGTAAGGTGATTCGATTTGATTT
425	ATCTACCCAGTGGATATGTAACATCTGGGGCTGCTCTGCTGGCTTTTTC[G/T]CGCTTTCCTCAGATGCTTTATCGTCGCCACAGTCAAATATGACCGCAGCA
426	CTACCCCACATTTCATTCGCTGCATAAAGCCAAACAATGTTCAGTCTCC[C/T]GGGTTGTATGAGCAAGGGCTTGTCTTACAGCAGCTTAGATGTTGTGGAGT
427	TCTATCACAGAGACTTGAGCCATAGTGTTTTACGACAGCAACACTGTTT[A/C]GATGATTTGTGCCTTAGTTTCGAGTAATCGAATGCAATCGTTACTTTCGT
428	CGATCGGAGAAGAAAGACCGACAATGAAAGAGGTAGCCGCTGAGCTAGA[G/A]GCCTTGCGTGTGACAGCAACCAAACATGAACCAAAGGAAACCAGCAGCAT
429	TCTTCTGAAGCTACTACCTCTGTGACAGCTTGGACAGAGGATGGCTGTA[C/T]AGAGACAACCACTGGCTCAACGGATTTGGTTCCAACATCGGCAAACGCAG
430	CAAATGTATTCTTAGACGAAAAGTTCAATGCGAAATTAGGCGGTTTTGG[T/C]CTTTCGAGAGCATTTGATGCAGCAGAAGGAAGTCATTTGAATACAGCCAT
431	TTGAGTATTTGCATACTGGCTGCACGCCACCGATCATTCATAGAAATGT[C/T]AAGTGTACAAATGTATTCTTAGACGAAAAGTTCAATGCGAAATTAGGCGG
432	TCACCATTTTATCCTGAAACCTGCAAGCAGTATTTACCATTCCGTGTAC[A/G]GAGAGACCAACGATGACAGAATTATAAGCAGCCGCGTGGTCCGACCACCC
433	GGCTGCAGCTTGCGGCTGCGTCATGTGGCCAGAAGTTGCGATTGTTGTT[A/C]GTTTGATAGCCTCAACGTCTAATTGCTGTTCGTTTGTCTGCCACTGCGGC
434	GACCTTTACACTTTTTCATGGCATTGTTGAAAACAGCCTCGGCTTCTTC[A/G]TACTTGTTCTGTTTTAGGTAGCTGCTAATCATAACATTAGCCAACCTCAT
435	GTTTTGTGAGGCAGCTTCCTGATTTTCCAGTTCCCGTTTCAGCAATCTA[C/T]ATAAATGACCTTTCAGGGGAAATCATAACTGCTGCTGGAACTTTACTCGC
436	CATCGGGTTTGCCTTTGTCGTGGTGGTATGAGTCATTCCTCTCTTGTTA[G/C]CGTCATTGCTTCCATCGATGCCTTGCTTCAATGCAGCTATCTTCAAGCCA
437	CTTCAGAGGTTTAATGCTGGAGATATATCTAACCAAGGAGAAATGAGGC[G/A]GTATCACGAAGGTGCACAATTTCTTCCCCAGCAAACGTATCCAATGCAGC
438	GCTGCACCAAGAGATGTGGCAACCGAGTTGTCCAACATGGCATCCACAA[T/C]AAGCTGCAGGTTTTACCATTCACTTTACAAACTTTATAATCTAAACACAT
439	TTGGAACAGGCGACAAAAGAGGCAGAGGAAGCAAAGTTCTTTGCAGCAA[G/C]TGCTAGAGACGAGCTTAGAATGGCGAAGGAATTGTCTGAACAAGCGAAAA
440	GTATTCCTCTTTGCTTGGCAGCCTAATTCCATGACTACATTCTTTCATG[C/T]GTGGCTATCCTCTTGCTTGGTTAGAGATTATAATGGATTATCATGACTGG
441	ATACTTGCTCGTTTTTATATGCAGGCTGCAGATTTGAAAGAGAAGATCA[G/A]CCGCATGTACAACGGGGAGCATGTGAGTCTCCTGGATTTCCTAATCGTGC
442	TTGTTGCTGAGGACCACCATACACGGGATAACCCCCATACGGTGCAGCA[G/C]CATACATTCTCGGGTCAACAGGTGGCGGTAACATGTATCCGTAACCGTTG
443	GCGGATGCTGCATTGAACTTGTTAGCATCTACTTGTTCGTTTTTGGATT[C/G]CATTCTTTGTTATATTTTCTTGTCCTGTGGCAATCTATGTCTATCCCTGG
444	ATATTTTTATTGATGATTTGGCTTTCTTGTTTCTCTACAGATGTTTTAT[T/G]TAGCCCTAAATTTGGTTATTTGTGGCAGGTGATTAATGCAGCTTGGGATA
445	TACAGGAATCGACTATAGGTGCAGCTTTTTTCTCTCAAACATTGGCTGT[C/G]AATGATGCAACTGTGAAGTTTGAGATATGGGATACAGCTGGTCAAGAACG
446	ATGCAACTGTGAAGTTTGAGATATGGGATACAGCTGGTCAAGAACGTTA[C/T]CATAGCTTAGCTCCAATGTACTACAGGGGTGCAGCTGCTGCGATTATTGT
447	GCAAAGAAACACTTGATCTGAAGCTTGATGCTACCTTGGAGCTTTGGTC[C/T]CATGAACTCAGCTGCGAGAAGGTCGACAAGGGCCATGTAGATGAGTAGTC
448	CAAAGATAAGAACACGGCACTTTGTTTCGCTGCTGCATCAGGAACAAAA[A/G]CGATGGCTGAAATGATGGTCAATAGAAATGAAGATCTCCCGATGATTCGA
449	TTATAACAGGAGCAAAACCTTTGTTGCAGCCGTTGATCAATCTGTTCCA[T/C]GGGGAACTTGGAAATGGCCAGTGGAAACGTAGAACCGATGCTGCGCTCTT
450	AAGGAGATAAGATCGATATCGGTAAAGATGTTTCCGCTGTGAAGAAATC[T/C]GGATGCTGCTCGAACTAATAAGAAGAGAGTAGAAGAGTTACTGTTAACGA
451	TAAGTATTGGCGATACACGACCGAGTTCTACAAAGATTGATATGAATTC[A/G]GAGCATGTTACTACCGCGGCTGCTCCAAAAACAGGGGTTAACGATGTGTT
452	GTGCCATGTCCATTCGCTTATTCCTTTGTATAATGTCATGCTGCTTCAT[T/A]CTGTAGCTGTGGATGCCCAAGCGCAAAAGTAAGTGGACAAGGTTGTTTTG
453	TCTGTAGAAGATTCCCAGCAGCTGAACCTCTGTAAACCCGTGATGGGGA[C/A]AGTCTCTCTGATGTCCCTTGAACCTTTCCCACGCAGCCTTAAATGCTTTT
454	ATTTACTAAGGACACCAACAAGGCTACTCTTCGATGCTGCATCATCAGG[C/A]AACGTTGAGTTTCTTGTGATTTTAATCCGTTCATATCCTGATCTTATATG
455	TACACACACCGTTGATGAAGACTCAAATGCAGCTTTGCTCTGATTCGCA[A/G]AAATCAAGCGAACCGAAACATTCATTTCTTCTTCTGAAATATGCTGATGC
456	TCAATGTGACTCTGATTTCCGCGGCAGCAAACGCGGCCGCATTCATGGC[A/G]GAACTGGGAAAGAGCGGTAACAAACACGCGAGATGGGGCAAAATATGTGA
457	ATTATAAACGAGTCCATGAAGGTTTTAAGCTAGCTTATACAGATATGGC[T/G]CAGAAATATCCTTGTTTCGGTTTCGCTGCGAAAATGCCAAACATTGTTTG
458	AACGCCAAGGACAAAGCTTATGATGTGAAAGAGAAGACAAAAGATTATG[G/C]GGAAGAGGCTAAAGATAAAATGAACGAAGGAGCCAGCAGGGCTGCTGATA
459	AGCCTACGAGACTAAAGAGAAGGCCAAGGATAAAGCTTATGATGTGAAA[C/G]AGAAGACGAAAGATTATGCGGAACAGACCAAAGATAAGGTGAATGAAGGA
460	CCTGAAACGAACAAAACGGTTACGAAGCCTCAAGTTGAGAAGCTTGAGT[G/T]TAGTTTACTTTTCACATCATACTCACCTTGCAGCGGCTACATAGCCTAAC
461	GGGCTTTGTGAAACATCTGCTTACAAGAATGCATAAAAATGATCTGGCC[T/C]TCAAGAACAAAGATAAGAACACGGCACTTTGTTTCGCTGCTGCATCAGGA
462	AACCGTATATCAACGATCCTATCGGAATGTTAGTGATGAGGATATTGTG[A/G]TTAACCCCAACACTGTTAGGTCCAAAAAGCTCAGATGTGATAGAAACCGC
463	CGGGCTTTGTGAAACATCTGCTTACAAGAATGCATAAAAATGATCTGGC[T/C]CTCAAGAACAAAGATAAGAACACGGCACTTTGTTTCGCTGCTGCATCAGG
464	GTTTCTTGTGATTTTAATCCGTTCATATCCTGATCTTATATGGAGAGTT[A/G]ATGAGGAGAACAAAAGCTTGTTTCACGTTGCTGCATTAAACCGTCATGAA
465	TGAAACTGGAAGAGGCAGCAATGGTGCATAATTTGTAGTACCATGATTT[C/T]GTGATGACACATCCACTGATACCGGCTTAGTTGCAGCAAACATCTCTTGT
466	TCTTGTATTAATCTCTTTAAGCTGCCTGAAACGACTGCTGAACTCAACA[G/A]TATGCAGTTTCTGGATATTTCTGAGTGCTCGAAATTGAAGAAGTTACCCC
467	CGTCTTGGCAGCAGAAATAGTGGTCGGCGCATGTGCAGTAGTGGTCATC[A/G]CGGTAGAAGGTGCAGTAGTGGGCGCAGGTGCAGGAGTGGGTGCAGCTAAA
468	AGCTTAGCAAAGGAGGAGAGCTCATCAACTTCGTTTGGCTAGCAATGGC[A/T]CACTTCAACCTTGGAGATTAGCTGCACATATAGTGTTGCTTCTGTTTTGA
469	GTGGAAAGAGATCGGCGAATGTATGTAAGCTGAAGTGAACGAAAATGAG[T/A]GAGATGGTTAGCAAGTCTAATGGCTGCCATCAGTGTGTGAAGCGTACCTA
470	TGTTGGGACGCTAATCCAGAAGTGCGTCCATGTTTTGTGGAGGTTGTGA[A/G]GCTGCTTGAAGATGCGGAAACAGAGATAATGACGCAAGCTAGAAAAGCCC
471	CAATCACACACAAAACAAAAATTATACTACCATTTGAAAATTGTAGGCA[G/T]ATGGGGTTTCTCAAATAAACTATTTTCACCTGCTTCTCTAATTCAGCAGC
472	ATTATTTGAAGCTAGACAAGCTGCAATAGCACAAGAGAAGGTTAAAGCT[G/A]TTGAAGCACCTATGCTTTATAGTTGTGGAGTCTGTGTTAAAAGTTACAGG
473	CTTCTGCAAGCACATCTCTCCTTAATCTCGAATCTTCTGTCTCCGTCTC[G/A]AACTGGAAGCTGCAAACTTCCAATAAATAAATGAGTAACACTTAAAACTA
474	GCTGCACAAGAGAAAGAGGATTCAGATAGTTTTCACTCATGAAAGTTGC[A/G]CGAAGAACATTTCAGGGTTTTTTACTCACGTGTAAACAATGACCTGCATC
475	TTCTCCTGTGTGGTCACTCTCTTCTTGTTCGGGTTTCTCCTCAAAGCAA[T/A]CGACTTCTTGTTCGGGTTTTTCTTGGCCCGATCTCTGCGTGCGTGGCTAC
476	AATTGCTGACTGATATCAACTCTCCACTGCTGCAAAAGCGTCAGGAAGT[G/A]GTTGCAAAGCAAAGCCAACCTGTTCCTCCGTCAACCCCTAGTCCAGCATC
477	AGTAGTAGCAGCTCAGTGATCGAAACTATGCAATATTTCGTTGTTTAAT[T/C]GAGGTTAACAATACACGAACATACACAGAATCAGAACAGTTTTTGGATAG
478	TTTGCTAATTTTCGTTACTTTCGCTTGCGTTTTGCAGTCCACAGCCTAC[A/C]AGTGGAGCTCCAACCGATGCAGCTCCAGCTGCTTCTGCTGCTGCTGCTGC
479	GAAAGAAACACGCAGCTCTATACACAAGCAAAGGCTTTTCAACAGCAAC[A/G]CCTTACTCAAGCACTAATACAATGTCAACCGGTCCATCTTCCACAACAAT
480	AAAAGAATAAAAATAAAAGAAATTGAAAGCTGCGTTTCACACAACGTTG[A/T]TCTTTATCAACACAAAACACTTCTCCACTATTTCTCTAAATTTCACACGC
481	TCAACATTTCTTTTCCTTCCTTTTTCCTTTGAATAGTTTCAACGTCATC[G/A]ATGCAATCCCTCAGCTGCCTGAAAATATTATCACAATATGTGAGCTCTCA
482	CCTCCCATGCTATGAGCAACAATAATCACTTTTTCGTCATCCGAGCTTA[G/T]CAACTCAAGCAATGGTTTAGAGTAATCTTTTAAACTCTGAATCTCTTCCA
483	CCCTAACAGCTTAAGGGCCAAAGGAAGAAAGCCTGCGAGATGGACAGCA[T/C]GAACTGCAAGCTGTTCGAAATCACAAGGTGGATATGGCTGCTTGAAAGCA
484	TTGGTAATGCAGATTTGGGTTACCACTAAGATTGACCCTGACTCGGTGT[C/T]GTGGAGCAGGTTTTTGAAAGTGGATATGAGACAACTCTCTGGTTTTCAGT
485	GTGGTATAAACCCAAACGCTCCTACCACCGCGTTTATATCCCCAAAGAA[C/T]GGCAGCATCGCTGCCATGAACCCGCAAAACGTCATGTAGAGCGTTCTTAG
486	AGTCAGACATATCAGCAGACTATTACTTACCTTTCTCCTCACACGGAAG[C/T]GCTGCTGCCATGGAAGCTGGTCGAGAGGCAGAGTCGATGAGCTCGTATCT
487	TGTAGTAGTGCCTGAAGAGAGTGAGCTTCACGAGGTTGACGGCAGCCTT[C/G]CCGTCGGTCTTGGCGGCCTCGCGCAAGTTCTTGATGGACCAGACAATGGG
488	GAAGCACCTCGAGACGAGATTCGGCATCGCGTTTCCTGGCTTCCTCGCG[C/T]TTGATCTGCTCTTCCTTAGCGGCTGCTTCTTCGTCCTTGCGGACTTTCTC
489	TGGCTGAGATGGAGTTCAAAGAGAACGATACTCCTGAAGAGCATGAGCT[A/G]AAGCTGCGTGTGTTGCGTATCTACTCGAAACGGTACAGATATTAAGATCA
490	CATAAGTACTGCTTGAACCCATGTCATAAAATATGACATGTCTCGACCC[A/G]TTTACAAAGTCCTTATCAATCCCATACTGCAAAGCAGCACCGGAATGCTC
491	GCAAGCACTCGTAAACCGCCTCTATATCCGCATATGTATCGTACTCACT[T/C]GGCTGCATACACACATTACAAACTACAATTGGTAAAATGTAAAACCAGAG
492	GCTTAGAGGCAAGATGCAGCGTTGGTCCACTACCAACCGATTGACCATA[C/T]AAGATCAAATCTTCTTGTCCTACCCCATATTCGGTCTGCAAGCACTCGTA
493	GTAGGATTGATACCGTTAAAGATGGTTCTAATCCTACTAAACGTCCAAC[C/A]AGAGCAGTCGAGTAGAGCGAGAATACAGTTGAAACGATCACTGATGTGAA
494	AAGGTTGCATCAAGAAACCGAAGATTAGCATCACCAAGCTCACTGCAGC[T/C]ACTTTAGCAGAAGAGAGTGCTACAACAACACAGATCAGTATGGTTGGAGG
495	CTTTAGCAGAAGAGAGTGCTACAACAACACAGATCAGTATGGTTGGAGG[A/T]ATACACATGAGAATCGAACCTGTGGTTCCGATAGGTATCTTGTACGGTCT
496	TGACCGGGCAATCCAATATCGACTCTCCCGTCAATGCTGCTGCTTTCTA[T/C]GGCAATTTAACCGATTTCGATCCTCAAGAAGCAACGGTTTCATGTGAGTT
497	CAACTTTAGTTAAGATGAAGAAGGACTTCGATTCAAACTGTGAGAGGGA[A/G]TGCTTCTCATGTTTTTATGATTTGCATCTTTCGGCTTCTGGCTGCAAATG
498	CAGCTTTGATCTCTGGATTGTTGCTTACGCAACTTATTATTGGAGAAGT[A/G]AAAACTTTGTTGTATGGATCATCAGAAGAAGATGAAGTTACTTCTGCTGC
499	TTGGACCAGTTCTTACGGGTTATATCTCCGCGATTAGTTGGGATGCTGT[C/G]TTTTATATGTTGATGAGTGCAGCTTTGATCTCTGGATTGTTGCTTACGCA
500	AGTCTCCAAACATTATACGTGTATTGCCAATAAATATGCGATGACACAG[A/T]TTATAGCTGCAATCACAATTTTGACTCATGCTCTGAAACCTTCAAATTGA
501	TGAAGAAGCTTGGAATCGACGAGCTGCGATGAGTAGTAGTGGAAAGAGA[C/A]GATCTTTGTCTCCTCCAGGGAATGTTGATGGATTTAGTATTGGGAAATCG
502	TATCGATCTCGTGATGACCTTTTGTTGTTGTACGGCACTAAGATTTATG[T/C]ATTTGTGATTGTAGGATGCTGCTGATGAAGAAGATGATGATGATGTTGAT
503	GTGTGACCATATTCGAAACAGACCGCCATTTCCCATCCAAAGGGTTCAA[A/C]ACCTCCGCGGAATCCAGCTCAAACAAATCCGCAGCATTCCCACCCGCTGC
504	TGAGCCTTTTTTGAGACTGCTATCAACCAGGATATGTTTATGGGATTTG[C/A]TGTACTTGCTTTCTTCTAGTTCGATTTTGGTGGCCATGTGTAGCAGCATT
505	CTTCTAGTTCGATTTTGGTGGCCATGTGTAGCAGCATTCATGCACGATT[A/T]TAACATAAATTGCATTACTGTATTTCAATTTTCCTATTTTGTAAACTTCT
506	TGGTGTGAAGGCACAAGCCACGATCCAGTTGCAGCTGGAAGATGTTCTT[C/T]TGACCGGAATTGGAGCTGAACAGACAAATAAACTGGCATTGGGAAAAGCA
507	ACATGCATTTGTTTTCAAATTAAAGGAAAATCAGAGTCAATATCCCATT[A/G]CAACTTTTGGTGGTAACTGTAGAAATGCTGCTACTAGAATGAGAATGTCG
508	GAATGCATGTGTTAAATGCTGCCTGAGGTGTCCCATCTCATTTTCAACA[A/G]TTGTACATGCATTTGTTTTCAAATTAAAGGAAAATCAGAGTCAATATCCC
509	CTACTTTCTTTTGTGATCAATCCATGCAGCTAGAGAGAAAGCTATTGTT[G/A]TCAATTTAGAGGTCTTAAAGGCGATAATTACCGCAGAAGAAGTGCTGCTC
510	TCAAGTAAGAATAGAGAATCAGTAACAAATTCTTGAAGAATGGTTGTTG[G/A]CAAAAGTACTCACTTACCTGTAAAACTGTTTCTCTATATCTGCAGCTTCA
511	ATTTTGTTACTGCAGGATCACCTGTTTTCCAGGCAGCGCACCGTGGCCC[T/C]TCATCAGGGAAAATTGTTTGGTATTTGGATGGGGACCCCACTGCTTTTGA
512	TCAACATACATTCATACTCATTAGAGACCATTTCTATCTCTTCTCTTAC[C/T]GATCCTAGCTCAGAAACCGCTGACAAATGCCTCGCTTTAGCCACCTCGAG
513	TTCGCCTCAGTTAACTTACTTTCTATATCAGAGACTCCTGTTTTTGCTT[G/T]ATCTGAGTCTTCCTTCGCCTTTCTAAGCTCCTCTCGAGCAGCTATGGCAA
514	TTCCACAACTGAATCCTCGGCTTTTTTCGCAGCCAACTCTTTTTCCCTC[C/A]ACATACATTCATACTCATTAGAGACCATTTCTATCTCTTCTCTTACCGAT
515	TCTCTTCTCTTACCGATCCTAGCTCAGAAACCGCTGACAAATGCCTCGC[C/T]TTAGCCACCTCGAGCTGCGCTTTTGCTGCGACACTTGACTCATCAGCTAT
516	CTGCTTTATATGCATTCCACATTCACGACATCCCGAGAGGTTTATTAGC[G/C]ACAGCATTTCTCCTAGTAGTCTTCAACTGCCTGAGCAGCTTTCAAATATA
517	ATGCGGTTTAACATTCAGTAAGTTTTAGCAACTTCAGTCCAATCAGATT[C/T]CAAATCAATAGAGACGCAAAAAAAAATTCCTCACCTCCCGGCGAAGTAGC
518	CTGCAAATGGGAAGGCACCACTTACGTAGTATATTATCATGCTAATGTG[A/G]CGGGTACAAGCTTGCTCATATGCTTCACTTGCCTGGTGATAGAACTTGGC
519	TTTGTTTATCGACCAAACTAAGACTCGATTACATCTTCAGGCTGCTTGA[A/C]ATTGGCTCACCAGATGCCCGGCTGTCTATGGAACTGCAAAGGGTAGCCGT
520	CATGAGGTTGCGGTACCATGTATCCATACCCATTGTAATACTGTCCTCC[A/G]TAGTACGGTCCAGCCCATTGGTTTCCATACTTATCTCTAGGCTGCAACAC
521	CTTTAGTGTATAAAGCCGATAGTCCCCGGAAGAAAGGACCAGTCCGGTT[C/A]GCACCATGGGACTTAATAGCTGCAGTTTCCGTCTGCTTCACCACACCAAT
522	AAGTGAAGCAGAGGAAGTTGTTGGTACCTTGTAGAGTGGTGCAGCGATG[C/T]AGCGGAACAGAATGGAGAGGAAGAATAATCGGCTTGACCGATACAAAATG
523	CGGTTCCATTCATAGGAATACTGAGGAAGTCGGTGTTGATGCCTAAGAC[A/C]GCGATGGTATTCACAATAGCAGCATCGGTGTTGGGACAGGTGATTGGGTC
524	TTACCTTTGTCTGCAGCTCCTCTATCTTAACCTCTATAGAAGGTAGTCC[C/T]GAATTTGATCCTGAAATGATTTCTTCAAACTTCAAGGCATTCTTTACTAG
525	CCTATACAATGACAGTACATTATATACTACATCAAAGCAATGAATGATC[G/A]TACTAAGTTTAAGCTTCTGTACCAATTACCTGTAGTGCTGCTGGAAGCAG
526	TGGAAACTCGAATAAAACGACTGCATATTGCCAGATCGACCACCACCAG[G/T]AGTGTTGGAAGACAACACAGGACCTGGAGTGGACACAAACCGCAACTTGG
527	AAGAAAGATTCTAAACAAGTCCACCTTCAGAAACGCCAACACAGAGAGA[G/A]AACAATAAGCAACGAAGGAGAAAAATCAGAGCTCAAAGCTAGAACAAGAA
528	ATATCTCGACTTGATCAAATAAATCTAGCTGCTCTATAGATGGATCAAC[A/C]AATTCGTCTTTGTCTTTGCGGTAGAGATGGAATCTCAGTGAACAAACCTT
529	CAAGAGTCTAAGACGTCACGATGACAACTATACATTGCTTATCACCATC[G/A]ACGGTATTGCAGCTGAAATGAGAAACACTAGTTAAGATGTTCCTAAAACA
530	TATGCTGCAAAAAGCCAAGGTCAACACTAGAGGGAGGCTATTAGATTGC[A/G]CATTGGACAAGAAGAAGCTTTTGCTTGATCTGCCTCTGCTGCTGCTGCTG
531	GAAATAAACCAAACAAAAAGGTAAACGAAGATTTGTACCTAGAAGCTGC[A/T]TCAAGCAAACTTCTCATGGTAAAACCGGGATCACCACTCCAAGTGAGCAA
532	AACCATACCTTGCATCTGAAGGGATGGAGTAGTCAGCTGTACCATGGAA[C/T]AGAATAATGGATGGGAGACGAGCAGCGATGTGTCTGAGATTTGGGTTTTG
533	TAAGGAAAAACGATGCAGCAAGACATCTACGAAACTCAAGCATATCATT[G/A]CCGCATGAAGACACCTTAAAATCCATTTGCTCAACATGTCCACGAATTTG
534	GGAATCTCAGTGAACAAACCTTGGAATCCATTGTCATGAACCCCAAAAA[C/A]TGCTGCCTCGCACTCAAAATCCAATCTTTCGATAAAGCTCCATATATTGC
535	TCTCGACTTGATCAAATAAATCTAGCTGCTCTATAGATGGATCAACCAA[T/G]TCGTCTTTGTCTTTGCGGTAGAGATGGAATCTCAGTGAACAAACCTTGGA
536	TTTTACATTCTCCCCTTCGGTTATGGCAGCGATGGCAGCCTCGAGGCAG[C/T]TCGATATGAAGGGAAAAGGTAGCATTGACATTAGTCTTGTTATTGCTTCC
537	AGGTTTGTTTTAATTAACATCAGTACTCTTTGCGAAATTCATACTAAAC[T/A]CAATACGTATGCAACTTCTTTGACTCTATCGGATCTATATTCTTGTCTAC
538	GAGAATGGTTTGCTGCTAGAGTTTCTGCATGTGGTCTATTTCATGTTGC[C/T]TACCAAGGATGTACTGATGTGCTGAAGACAGAGTTACGGGCTACCTATAG
539	ATCAACCAGCTCTCTGGAGCGTTGATAGCTAAACAGCCTAAATCATCTC[C/T]CATATCGGAGTAGTACACGTTGCTGCTTCCTTCTCCTCCACTGCAATTAT
540	GGCAGCTCTTTTGATTCTTGTGGCTTTATCTTCCAACTTTGACATGGTG[A/G]CAGAGGCTCAAGAATTAGGCCCTGGAGACTGCTACGACGGTTGCGCCACT
541	GCTTTAGAGACTCGTATCACTTGTGGTATCGACTTCCAACAGGTTCGTT[T/C]TACTGGCATTTTCCTGCTTGTGCATAGACGTGGTCTGTGGTTTATGATGA
542	AAGGAAGAAAAAAGGAGGTTTTCTAATATCAACCAGCAAGACGCAGCTG[A/C]GGAACAATCTCTCTGTAACGTGTAAGGACTTGTTCAAAGCCGTTACAGAA
543	CTCATGGAAACCAAAGACTACACTTGGAATCCCGGAGTGGCTGCTCGGC[A/G]GAACTCAAGAAAAAAACGACTGGTCACTAACATAAGCCAAGTTCCAATTT
544	ATCTTTCTTTTTTGGTTACCTCTTTGTAGCATATATGTGGCAGCTTACT[C/T]GCTTTCTCTCTGGTTCTAGTAATTTAGTGTTTAGGCATCTTGTTCCTAAT
545	GTAGCAGCACAAGCCATAGTTGCCATCTCATTGTCTGATCACCAACGTC[G/A]CCCGGATGATGCCAATTCCTCTTCAACTGATGCGGCTGCGGAAAATCCTC
546	GCCCACCTCTAGATTACTTCGCCACTCTTCTTCTTAATCTCGTAAACAA[T/C]GTTATACCTCCACTTAGCAGCAGCGGCAACTGCAGCTCGAGGTCTGGCTC
547	TTGTGTCCCAAGCTTCTCTAGCGTTGTATTTGTCATACTGATCTTAGTA[C/G]TCTTCATGTTACTTTTCGCTTTCTTCTTCCTCAAAAGACCGAATGAGCAT
548	TTGCTGCTCGTCTCAAATCCGAAAACCCTTCATGGAGTCCTGCAGCAAT[A/T]AGATCTGCCATCATGACAACAGGTGAGATATCAAAATCGAGGGATTACAG
549	AATTGTGGCAGCAGCTTACGAGTGCAACATGATCATAATACCAGACGCA[G/T]CAACACAAGTTTGCCTCCCCCACCACCGTCATTAAACTTGTTTTGGACTG
550	ACAAAATGGTATTTTCATCTAAGAGATCAATAAGATTAGAAGGAGAAGA[A/C]GAAGCAGGGAAGTTGAGATTGGCTTGAGGGCCTTTAAGACACAAGAGTGC
551	AAGAATTTAGCAAAGCTCCCCAGACGCAGGAGTCTGGCTCAAAAGGTAT[C/T]TCCTTTATCAAATCATATGCCTCTTGCAGCTTGCCTGCCCGTCCAAGAAG
552	GCCACCTTGCAGCAGCCTCCAACCGGGTCAATTAGGTCCTGGACCTTCA[A/G]CGTGAGGTCCACAGTAGTATCTTGACGATATTGAGGGCTGCGTGGTAGGG
553	TATCGGAGCAGTAAGGATTGCATTCATTATCGTTAACTCTTGATTCATT[T/C]TCTTCATTTGTTGGTAATTGGGATGGAGTTTGGTTACCTCATTCTCAAGA
554	CCATCAAAATAAGGGAGCCTAGCTGCCGTAACCTTAGCTCTACATTCAC[C/T]AGTTTGCAAGAAAAAATGGTCATATAGATTTGTAGTTTCCACTACAATGC
555	GACCAAGACTGTTTCTGCTGCGAGTGGAGCTGTAAGAGCCGAGTCTGTG[G/A]CTGGTGTGAGTAGGATTGAAGCTGAGCAGAGATCTGATTCTGTGGCTGCT
556	TTGACAAGGAATCGCAGCTACCAAAACCCACATCACAAACAACAAAACC[G/A]AAGTCATAGTATAAACCGGTACAGCTAAACCATTACTAGCAGCTACATCA
557	AAAAATCAGAATTGCTGCATGAATCCACAGATGTAGCATTCAAAATTTT[G/T]GCTTGTCTCCGGAGACTTTTGCGACCCTTTTTCCACAGAATTGCTGCATA
558	CAGCTGCAGCAGAAAGTTCTAAGGTGGAGGAATCCGAGTTTGCTGACTT[G/A]GCGGCAGCAACAACCATGGAGGATGCAATAACAGCTGCTGCAGCTACGGC
559	GTTATTGCAGCAGACACAAAGCCATCAATTGCAGCAACTTCTGTCGTCT[C/G]AGAATCAACAGCCCTTGGCACATGGTAATAACAGCTTCTCAGCTTCAACT
560	TTAAAACGAACAGATCGCATCTCATGCATTCATTAGTGAGGAATAGTTC[C/T]CTCTCGTTAGCAGCATTCCCTAGAACAGTCTCATATCCTCTTTGAAAGAG
561	AGGGAACAAGGTGATGATGTACCTGAATCTCTGAGAGAATGCAGCCATG[C/T]AATGCCATAACCATGAAAGCACAATGCCTCAATGCACCACCTACTTTCAC
562	GCTCGGCGGGATGAGGAACAACGCAAGCGTGATGAAGAGCAACGCAAGC[A/G]TGATGAGGAGCACCATAAAGGTCAAGAGCAGCTCGCTGAAATGACGAAGC
563	GTTCAAGTTTAAAGGCGCTGTAACAGATCAAATTGATGTATCCACAGCG[A/G]GAACGACATATTGTCCTGATGTTGTGGGCCCTGCACAGCAGCAGCAGACA
564	TGTATTACCAGTCACTCGGATTAGGGTTTTAAAGGGTTGTTCCCGAGAA[A/G]AGATTCCTGACTGGTTGGCTACTTTTTTTTGTATGATTCGATATGCTGCT
565	TTTCGGGATCTGAGATTTGACAAACACGGGACCTCTCAAGCAGATAAGT[C/T]CTAATAGCTGCCCCAGATATCCTTCCGTTCTTGTCAAATTGGATTTCAAC
566	GGGAACTGAGCAACTGTTGTTGTGATTGCTGCAATCCTGCAACATTGCT[A/T]TGACTGCCCAGTGGTTGCTGATGTGTTCCCTGAAGGCTGTTTTGTTGAGG
567	TGTTTAGGTACTCCACCTGGAACCAAGCAGCCTCTGAACTGGTCCCAGA[C/A]ACTCCTCAGGTAACTTCTTGACCCTTCGTCTTCCTTCTGTCACACTCGCA
568	ATTCTTGCTGCCACGACAAAACATCTGCCAAATATGATTATGTATAAAT[T/C]GTGGGAGAATCAGATTTCTGTGTGTTTAAGCAGCACAAGAAAAATAAAGC
569	GTACACTTGTCTAGCTTCCTCCGAACGTGATCGCCTACATTCAGAAAGA[C/T]CAGGTTCATTGCTCTCTCACATCTATCAAATCTAGATGCTTCTGCTGCTA
570	AGAAAAATGGCATGGACATCACATCAAATGGAAATGTAACATCTCTCGT[T/C]GTCAATGATAATTTGTTCACCGTGCAGCTATATAGTCTCAGTGAAGCTTG
571	CGTTTCCGATGACCACCCCACCTTCTAGTATTTTGGTGCAAACTCCAAG[A/C]TTTGTGGCCTCTTTTGGGCAGCTATGCTTTGAAGGATCACTAGGGTTAGG
572	AACATGGCACGGTCACCGAGATCCTTTGCGACTGAAGGGTCAGAGGCGA[C/T]TCCTCCAACGGCGGAGAAACTGAGAGCAGCTTGTTGCTGGAAGAGATCAA
573	TCAAGGAAGGCAGGTATTCTGAGCAGCGAGCAGCTAATATATTCAAGGA[C/T]CTTATGCTAGTCATCAATTATTGCCACGAGATGGGAGTTGTGCACAGAGA
574	TTAAATTCTGCAGCATATGTATTGAAAACATCAACTGCATGATTCCATT[C/T]TTGTGTTGTCTTCTTGCATGCCATTGTCTCTCCAGTGACGTTTAGCTGCT
575	CTCGGCGTCAAAAGAGTCAGGGGTCTCGCGAAAGATTCTAGCAAATTCA[T/A]TGTTTGCCTCGACTTGAGCAAGCTGCACTAGCTTCTTCTTTGGATTCCCG
576	AGTAATCCATGGCGATTCGATCATAGCAGCAGACAGGACACTGAAACTT[T/C]CCGTCTTCATCAACATCAACCAGACACCTCAAGCATTCCTTGTGAACTTT
577	CTAAGGAGAGAATGTCCGGGTAGTACTGGTAAGAGTGTCCGGTTTCTGA[T/C]TTCTTGAGTTGTAAGAGATGATGCAGCCAAAGGGTTTGAGTCTTTTAGCG
578	ACCAAATATGTGATCAGCTGCATTGTTCACGTCAATGGGTTTTCCCAAC[T/A]CATTTCCTGGACCAACGACAGCAGCCTGAATATCACATGGCAAAAGAGAG
579	TTGTAAAGTAGGAAGGAATCCCAATGACGCAATCCGAAACAGGCGTTTT[G/T]AGACTCTTCTCCGCTATCTGCTTCAAATGTGAAAGCAACATTCCTAATAG
580	CTTGACCCAGTTCTTAGGCAGACTGCTAACTTGGGAAGGTGAGATGGCC[G/A]AACAACTGGCTGACTGATGAATATGGTTCTGTAGCAAGTTGTATCTAATG
581	ATAAAAAGAAGAGGTTTGCAGGGCACATCGCTGCTGGTTATGCTTGCCA[A/G]GTTAATTTCTCGCCAGATGGACGGTTTGTAATGTCGGGAGATGGTGAGGG
582	CTGCGAAGGCACATCGGTCTAGTTCAGCAAGAACCAGCTTTGTTTGCAA[C/T]GACTATCTACGAAAACATCTTGTACGGAAGAGAAGGAGCTTCTGAATCTG
583	CTCGAGATTGCTAAACTCCAATGCTCTTTCGCGGTGCAGCAGAAGATAA[A/T]TTTGTCTGTTTGGGAGGATTCAACAGAGGTATTAAACCTCTTTCAGAGTG
584	CATCCAATGCTTTGACCACTGCTCTCAAGAGCTTGACCCCGGAGAAGCC[G/C]AAAAAGAGGAACTTTAAGCATTACTGTATGCTGCCTTCATTGGAAAGTTT
585	GCACGAAACAACAACACAGATGCCTTTGTTTTCATGGCAGAGAGTTTGG[A/G]CATTAACAGCCAAACCATTCTGCAGCAAACAGATGAAAATGGCAACACAG
586	GAAAAGATGCAGCCCATCTTCGATGCGGTCCTGCGAAACGACGTTCCAG[C/A]TTTTATGGGTTTGGTGGAAGAGAGAGAGTCGTGGCTGGAGGAGAGAAGCA
587	TGGAATCTCACGCAGCATCGGTCCTCACTCCTTTCGCATTCTCGAAGCT[T/C]CAAGAACAGCTTGTGCTTGCAGCTCACTATGCATCGTTCCAGATGGATGA
588	TCTCTCACCACACTATTACCAAGCTCTCAGGCTATTCGTAACCTTCCCC[C/A]TTCTAGAATCAGTGTTCCTCTCTACCCTTGGGTCTGTTGGCAGCTTTGGA
589	ATCAGTTGATAGACTTGGCTCCAGAGTGCCATGTTCCTCTGTCGAATTT[G/A]TACGCAGCTGCGGGAAAATGGGAGAAAGTTTCGGAAGTGAGAGAGACAAT
590	GCCATGGCACCTAGCACTGACCACCATATCCCTGAGAATGAAGAGTTTG[C/T]GTGTACTACTGTGGTTCGATTGAGTCAAGATGACAGAGACGAGGAGAAGC
591	CGAGGGGTATGGTTGATGGAGAAGAGTCAGATTTGGAGGAAGCTATGGA[G/A]GTTCTTAAGTCTGGTATGGCTGCTGCGATGAATAACGCTGATCAGTTACG
592	ATGCATGGGTATTGCCTGATGGGGAATATGGAGCTTATGAAATCAATGA[A/G]ACTGATGTCTTCATTATTACTGAGAGAGCTGCGCTAAACCTTGCCTATCA
593	CAAGTCCTGGATTCATCACGACCAAGTCTATGTTGTTGGCCTTGGCAAA[T/C]TGCCATGCTGCATCTTCGGCCAAAATCTTCGAGACTAAATACCATAGCTG
594	CCAAAGCTGGCTTGGGACTCCTTGTATCTGGATCCAGAAGGGAATCTCA[T/G]ATGGGAAGGTGGCAGCCAGGGAAGGTTCCCATCTCTGCAAGATTATCATC
595	CAGCTTCAGAAGATGAGATGAAGTATCACTTGGGTCTCACCAATTTCAC[A/T]ACCGGTAAAGGCAATGTTAGTCTCGGAGACTCGAGTATTCGTCCCCTTGA
596	CTGCGTTGGCGTTTTACATTCTCTCCGCTCTCTTCTTCAATAGCTTTGT[C/G]ATAATATTTGTGGTGACTGTTCTTCTTGCTGCCCTTGACTTCTGGGTGGT
597	TCTGAAACTTCACTCTCTTTCCTCAATAAAGCTCTTCTATATGCAGCTA[A/C]TTTCCTCTCCTTCTCCCTCTCAAACCTATCCATAAAGCTTGAAATCTCAT
598	CACCCATGATTTGCTGTTTGCATAACTTCATCTCCATCTCAAGCGTACG[T/C]AATCGACCTTCAACAGGAACCGCGTTTTGCTCAACCATTTGCTTTTGTCT
599	GAGGAACAGGGAGACTTGGGTTTGAAGTGGGAATGGCTGCTTCTTTCTC[G/A]ACTGGTACGAGCTTCGGCGTGTAACTAAAGTTGAGTTCTTTGTTAGCTGC
600	TCGGCGTGTAACTAAAGTTGAGTTCTTTGTTAGCTGCAAGTGCCACAAG[T/C]TCTTTCTCTTCAAGCCCTTTGGTTGGACCGAGGCTGCACCTATCGGGACT
601	AGGCTGCGCGTGATGTCCCGGTGGTCGAACCAGAGCATACACTATCTTC[C/T]CATGGTTATCAAGAACATGTTGCATAGCTGATAAAGTAGTTCCAGCTGCA
602	ACCTTGTCGTTGAAGATGAGCTCGGTGAGCTCTACGGGTACCTCTCTGT[T/C]TAAGTGCTGACCGTAGCTCGCTACAGCTGCTACACCGTGGCTTCTCTTGT
603	GCGTCACATGAGCCCGTTCAAGTTTTTCCTCTATGCCTTTCTTCTTTCC[C/G]TCTAGAAAAGATTTCACCGTTGGGTTTGCTGCAGCCAACTGATAAGGAAA
604	TCTCTCTTCGCCTATTTTACTGAAGAGTGTTTATATCATTTTCCATAAC[A/G]AGGTTGTTTCCCCATCTGCAGCTTTGTTGAGATTATGGCACCTGTGTTTT
605	AATCTATCGAAGCAATAAGAATCAACCATGGAAGAAAAAATTACAAACC[T/C]AGGGCTAGAGAGTTGAGTAGCTAAAGCTGAAGGTGCATTCCGACAAATTG
606	TTACCTCACACAAAAGTCAAAGAAAAATTTGTTTAGCTAATCAACTTTG[G/A]AGCAATGATTCGATGGCTCTAATTTTGGAGCTGCCTTAAGATGACACCAT
607	GCTTCTCAAACCTACCACCAAACTCCTCCACAACAATCGCACTTTCCGA[T/A]GTAGCAGCACTCGAAATCGCAGTCGATATCGCAAGCTTCTTCTCCTTCCT
608	CATCGCTTATATCGGCAGCTATGAAGTATTAAAAAAGCCTTACCCAAAA[T/A]ATATCTGTCATGAAAATCTCCAGCGGGTCAAGACTCCGCAGTAGGACAAT
609	CAAAGAAAGAAGATAGGAAGATTGAAGAAGCTTCTAAAGGACAAGGGAA[A/G]GAAAGTGAAACTGTTGACTCTCTTCTTAAATTACTAAGGAAGCATTCAGG
610	ATGTTCTAATAGCAGCAATGGAATCAAATTTGGCGAGCCGTTGAATTTT[T/A]CAGGCACCCCGTTTACCATTGGCCGTTCCAACATCTTCCAAGCCATTGGC
611	CCCTCATAGCTCTTGGCTGCAACAACAAGGCCACGTTGACTCATCTTGA[A/G]CCAAGATTGGTGGGATGCATCACGACTTGTGAACCAAGAAAGAAAGGAGA
612	ATTAATTGTGTTGCTGCAACGTTTCTATATGTGCAGGTATCTCATTCTT[C/T]TGTTCTTGTGTATTAAGTCTAATTCAGCCTGTGTTATTTTTCAGATTAAT
613	TAACTTCAATATCTTCCTCATGAAACCTAACAACTCCATCTTTAATCTC[T/A]TCAAAAACACTTAAAGGAACACCATGGTTAATCACCTGGAAGAATCCCCA
614	CATCGAGAGGTTGTTCAGTTCTTCTGAAGTTATCAACGAATTGCTTCAC[G/A]CTTTCTAACGAAGAGAGATCAAGATGCATCACTGTGTAATCTTCTTTAGA
615	TATGGTGTTATGCCTCCTGAAGCTTATCGTGCTGCTAAAGGTGGTTCTG[T/C]TTCTGATCAGAAACCTGGTCCTGTTCCTTTCTTCGCTGCTGGAGTTAGCT
616	CAAACTTTTTGAAGCAGGTCTTGAATCTCATCGCTTACTTCAATCTTGT[G/A]TTGTAACAATCTCTCTCGCATATCAGGACATGTTTTCTCTGCTGCTGCAT
617	GAGATTGAGTCATACTGGCCAATGCTATTCGCCAAGATGGCTGAGAAAC[T/G]TAACGTCACTGACCTCATCATGAACGCTGGTACTGGTGGTGGAGGAGGTG
618	CAGTAATCAAAGTCCTGTAAGAGGGTGGATCTTGCGCTCCTCTTTTCAT[T/C]AGCTGCCTAAAAACTTTCTCAGCTTGTTTTGTTTTCCCATTGGCGCATAA
619	TCATGGTTAAGTGTCTTGATAATCTATGTTAGCAGCCGTATATATAGGA[C/T]TCTATTAGCTCAAAACCCATAAGACTTAGAAAAACCTATGACTGATGCCA
620	TGTTAAAACTTGGTCTGGTAAGGTTTCATTCATCTCAATCTGCATTTTG[C/T]ATTTGTGGCTGCAAATCTAATTCCTGATTCTGTTTTGTGGCTCTCCAAAA
621	TCATTGGAAAGAGGATATAGAGATTCTCGTAGGGATACACCGAGAGATA[G/A]CTCCATTAGCAGCAGCCGTCTTCAGGGTAGAATTAAGCTTCGTGAAAGAA
622	TGCGGTTCACAAGTTTGATGGAGAAACTCAACCTGGGCTTACGCCGTGT[G/C]ATGATGCAGCTAAGAGATTGATGAAACTCGGGCTGCTTTTCACTGCGGTT
623	AAATGGTCAAATACTGATTAAGTCTGGATTTTGATGCATCTGAATGAGT[A/C]AAGTTTCTCTTTAATACCTGGGAAAACAAGTATTCGTCGAACATGGAGAC
624	TTGAAGAGGCTGAGTTGGCTGCTGCTTGGGGAGCTGTCAAATGTTTTCC[C/T]TATTTTAAAGTGGATTCATCATTACTGATTTGCTTTAAGAATACTCTCAT
625	TTGTAAACAATTGCTGCTTAACATCATTTTCCTTTCTTTGTAAACAATT[A/T]GCTTGCGTTTATACATTAAACAAATTGCCGTGACTTTCAGGTTGGTTGCA
626	ATGTCAATGCCAAAAACAATGGTGGTAGAGCTGCTCTTCACTATGCAGC[G/T]AGCAAAGGATGGTTGAATATCGCTCAGCTTTTACTTACACACGGCGCAAA
627	AACGGTGACCATAAGAATGAGAATGGTTACAAAAGAGACAAACCTCGAG[G/A]CAACGGTTCCAATGGAGGAAAAGGCAATGTGAAACAGAACGGTGCGGCTG
628	ACAAGCTGCAGTAGCTATGGGATCTGCTCTCGGTGCTTTGGTTTATCCA[T/C]GTAGAGCAGATCTAATCGCTGCTCTCGGTGAAAGCACTGGAAAACCAGCT
629	ATAAGTTTTGTGTATCCGGGACATTGGTTACGCTTGATGAGATTAACGA[G/A]ACGCTTTTACCGCTTAGTGAACCTTCTTTAGAGCCGCTGCAGATCAATGT
630	ACCAGAGAAAAGAACAGCTACTGGGACAACTTCTTTTTCTCCCTGTTTA[C/T]GTCAATAAAAAGATGTTTGGAGGTAAACCCGTGACTGCCGAATAATTTTC
631	AGCCCCAGGACTGTGTTGCCCACATTCTTCCCGTGATTGTTAATTTCTC[G/A]CAGGTAAGTCATAGAAGCTTTATGCTGATGATCTTTGGAAAAGCTGCACC
632	ATAAATCAGATGGTGAAACAATTCAGTGGTTGCTTCAACAAGCTGAACC[A/G]TCTATTATTGCAGCTACCGGTTCAGGAACTATACCGGCCTCTGCTTTAGC
633	CATTTCGAAATCACCTGAAACAAAACACAATATTGTCCTGTTTCTAACC[A/C]GAAAAGATGGTGAGACCCTAGATGAAAAACTGACCTCGGCAGCGGAAGAA
634	CAAACTCCAAACGTTTTGGAGAATGAAATGACCTTGGGGCAAAACCCAT[G/A]AACTGATATCACATGAACAAATACACATACATGCAGATCAGAGAGACTTT
635	CCATTGATAAGCTGCAAGTGAAATGGTTGAGGTCACAAATGGGTCTAGT[T/A]AGCCAAGAGCCTGCGCTTTTCGCCACATCCATAAAGAAGAACATATTGTT
636	GAATATCGCTTTACCGCGCATTTAGCGGTCTAACAAACCGAGCAAAAGG[G/T]TCACCAAAGAAATCACATAAACACCATAATCCTCTTAGCAGCAAACGTCA
637	TCGTAGATCTTCACGAGCAAGTTCAGCAAGCGACTTTGCTTCATCAGCC[T/A]CTTCTGCCGCTTGCTGAAGTTGCTTGGGTAGCTCCACCATTTTGTCTCTT
638	GCAGCTTTGACAACAAAGGAACTCTTCCTCACGGACACAGATGGTTTTG[T/A]GCCGAATATCTGTCTAGCGGTCTGAACAGAGGAGGTAAGTGAAGAAGACA
639	CAGCAGAAGCAATTTCATCATCGCAAGATGCAACAAGAGCCAATGCATA[A/G]GCAGCAGCAACAACAGTTACCGCAGCAACAAGCGAATCAGCAGTTTCAAA
640	TCAGAAGACGAAGAAGCACCACAAAGTCGAAGCACAGTACGAGATTGAG[C/T]ATTATTATGATTCGCTGCATCATCGTTTTCTCCGCCTTCCATATGAGCAC
641	AAGGCCTTGGTTTCTTCTATTGGTTTGACATTGAGATGCTGCAAGAAAA[G/C]ATCACAGCTCAGAGGGTGTCGTATTAAGTTAACCGCATTTTAAAAAGGAA
642	CATTCAATGCAGCTTTTGTCCTCTTCCAGTAAACTAGAACTTGCTGAAG[C/A]TGTAATGTGAAGAGGACCTAACGGGTACACTCGAACTCCGAGTTCTTGTT
643	GAGATGTTGACGCCGCTCTTCCCTCAGTTCTTCGTTCCGATCGGTGCTG[G/C]TGCTGGTGCTGGTCGATCTGCGGCTGCATTGATCCAGGTGCTCGTCTTGT
644	TAGGAACCTCTACAAGTCTTGCCCTTGCTGCGTTTGGAGTTGTGACATC[G/T]ATCCATATGTATACCAATCTCAAATCTTACCAATGCATCCAGCTCCGGAC
645	TCGACAATGTTGGGTACTTGAGCTTGTTCTGTTTCCACCAGTCAAGAAC[A/G]TCAAACTCCTGAACCCGGGGAAGCAGCGTTTCATCAAGGTACTGGTCCAG
646	CGAGAAGAACGGTCAAGGGTGCGTGTGAATGCATCTTCTGATCATCTAA[A/G]CCAGAAAAAAGAAAAGCTAGATGTTCTCCATTCTTACAAAAGAGAAATCG
647	AATTGGATTGATGAATGAAACAGTTGATGCCATCCTAGCACACACACTG[G/T]CAGCTCAAAACCCCAAGATTCGGTTGATAACTGAACAAGAAGCTGACTTG
648	TTGGACTTTCCAGAACACGTCTTCGGGCTCCATAGCTAGAGAGTTCACA[T/G]GTGAATGTTATGCCTGCTCCCCTGGTGGCAGAGGGCATGGCTATCCGAGC
649	GACTCAGAGATACTCTCCGAGTCAAAAATCTCATCTTCCACGTTTTTTT[C/T]GTCTTGTGCTGCACAGCGTAAATTTTACTCTCGTCAATTGAATTACATTT
650	ATACAATGGCTTCTGACAAAGACTTACCATGATGCTGCAGCAGGAAGAG[A/C]CGTTGATCTACCAGAGCTCCCACTAGGCGGAGAACCCTTGGGAGCACTAG
651	CACCACTCTTCCATCTCGATCTACCACAATATCTCTCTCATGTACATCA[G/A]AATGCATGCCAGAGTCATAATCTTTTTTCAGCTGTTGGGTTTTGTAATGC
652	TGATTATCGAACCAAGTCCTTGCTTGCTGTTACTGATGTTGACGCAGCT[T/C]GTAAGGAACTAGACCGTCAGAAAACCCGGACTGATACCTGGGAAATCTCG
653	ATGTACATCAAAATGCATGCCAGAGTCATAATCTTTTTTCAGCTGTTGG[C/G]TTTTGTAATGCATATTAACATCCCTCCTTTCATTATCCAAGTGTGCTGCC
654	TTTATTGCCAATTGGTTTTAAGTTGTACGCTGCTAAAAAGTTGAAATCT[T/G]TGGCGTTTCTAATCAAAGTTCTGAACATTTTCAGGTTTTTCGACAAGGCA
655	ACGGGCCGACTAAAGGAATGGCTGCCAGGGTGCCAGGCATTACCAGTTT[C/A]CTGGTCCGGATAGTTATCAGCGTGCTGCGCTGGTACTATAAGTAAGGGAT
656	TATCTGTTACGCATTTTTTGTTGAAGTTTTAGTATCTGACCAAATTCCT[T/G]GATTGATTGCTTCTTTGTTAGGACTTCATGAAATTTGAGTAAAGTTTGCC
657	CTCTTTTACATGCTTGGCAGCTCAACACACAAGTCCCAAAACCTCCATA[A/G]TCTCGTGATGCTCCATTACAGCTGCTTCAAAGACCATTAGTCCTAGAGCC
658	AGCAGCAGCAGCAACCGCAGCTAGAGGAAGCGAAGAAGGAGAAGGAGAA[A/T]GATGATGTTGAGAGTGAGGATAATCGAAATGAAGAGTCGATGCAGCAAGC
659	AAGCCTCATCGACAAGCTTGCAGCCTCGTTGCCTGTAATTGGTGTCATG[T/C]TTGTGAGACAAAAGATGATCATCCATAGTGTGATCATCCATATCTATAAG
660	CTTCTTGCAGCCTTAGATGCTTCTCAGCTTCTTCCTTCTGTGCTTTCTT[A/C]AGCTTCTTCTCGGTCCCTATTGTTTTCTTCTTCTGATATATAAGTGCTGC
661	CGAATGCAGCATCTGAAGAAATGCAAGACAAGATTCATATATCATACAC[G/A]TGGAGCAAACACGAAGAGGAAGCAAAGTCTTCATATGACAATCACCTGAT
662	AAGTGAAGATCTTTAACTGTTTCTCTTTGCTTAGAAAGAGCTTCAAGCA[A/G]AGCAGCACATTCATTCTCAACTAGTACTTTTGCATTTGAAGATGAATCAG
663	TTTGTTGTTTTATGTAGAGGCTGCTTGGGAAAAAGGTTATTTTTATCAC[A/T]GGAACTGATGAACATGGTGAGAAGATAGCTACTTCAGCAGCTGCTAATGG
664	GAGCATTTATTAGGCCAATGCCATTTGGGAATGAGATTGGATTGCGGAT[G/C]CTTATAGGTGGAGCAGTAAGAGAGGCTGCTCTGCTTGGTTATCATGTTAC
665	GTTGGTGATAAGGATATTGGTGCGCCTTACTCGGTTTACACGGTAAGAA[A/G]GAAGGCTTCTGGGATGAAAAGGAATAAAGACGCAGCTTCCTCTGGTGCAG
666	GGGTTCCTCTTCATCTTGAAGTTCTTGTGGCATTTAGATCTACAGAACC[T/G]GAAAATCTGCAGCGGTAGAAGATAGTTAATTGCTATAGTAAGCTGAATCA
667	TATCACTGGTTCAACATTGTGAAGCTGTTGCTGTTGTATTAGCGATTGG[A/C]GCCGTTGACATGGATCTAGTGGAGGTTCACACGGTTGCCGATAAGCAGCA
668	TAAATTCATGCTGCACCAACGGCAATAATCATCAAAAGGTGAATGGTGT[T/C]TAAAAAATCCAGCTCAAGATCTAAAAGTAGTAAGAAAAAATGCATAATTT
669	TAAAAAATCCAGCTCAAGATCTAAAAGTAGTAAGAAAAAATGCATAATT[T/C]CAGCTGCTATAATCAAACAGGAAGTCGTTCCAAAATGCACCACTGTTATA
670	AATGCAGCTCATAGGTTAAAAGCTTCTGCAAATGAGAATCAAGAGATGG[T/C]TACGGAAGGAGTCTAAGATAACAGTAGCAGCGACTCTGTTTTTTTTTTTC
671	AGCAGAATCAAAGAGGGCTCAGACATTTGTAAGGAGAACAATGGGTTTA[A/C]CTTGTCCATGCCTTATTCTTCAGGGCCTGGCCAGATTGTATCATCTTGTG
672	TTGGACTGTGGTAATCCGCCTGGGAAGAAGTGGACAAGCGATTCTGTTA[T/C]GGTTGCTGCAGAACAGAATCATCCAGCTGCTAAACTCCTTACTGAAATTC
673	CTGTTATTTTGTTCAGAAAGATGCAGCAAAGAGAGCATGTTGGCCTTCT[C/A]CACACCTCCGATGAACATCCTTCATTTGATCCGCTGATCTACATATCCCA
674	TGGCACAGTGAGAAAGCTGCCAAGAGAAGACGGTCCTTCCGCCTCTGCC[T/C]ATGGCTCAGTGAGAACGCTGCCAAGAGAAGACGGTCCTTCCGCCTATGCC
675	GCAGCATATTTCAGAAGAAGAAGATGGATGTTCTGGTTTGCTGGTTATT[A/G]CGAATCATGAGATTGTGGAAGCAGCATTGGACCCTATAACAGGGCGTTGC
676	GTACAGCCAAATGCTGCAAGGGCTCAGACATTTGCAGAGGCATTTATCA[C/T]ATCTGGTGGGATAGAAACACTTCTTGTTCTGCTGCAGAGAGAAGCTAAAA
677	TAGATTATGGTGGCAGCGCTGTCAAGTGGACAAATCCCTTCTTTTTGTC[C/T]CCATACAGAACCAGAAGCAGCTTCAGTCTCTTTGATTTTGTCTATCGTAG
678	ATCCAGGTTGATACAGTAGTCTTCTTTCATGTTAGTGCATAAGGTGTCT[C/T]TGACTCTACTTGAAATGATTGACTCATTTCGGCTTTATGTATTTGCAGCT
679	TTTTGTTCAATGAAACGATCAGAGCGAACATTGCTTACGGTAAAGGAGG[A/T]GATGCTAGTGAATCTGAAATTGTATCCGCAGCCGAGCTATCTAACGCTCA
680	AATACATATCAACCCTCTCCAACACAAGACCATACCGAATCAAGTACTT[C/T]AACACTTGACACTCAGACATGCTGCCAGTGAATTCCTTCACTTCCACGAC
681	TGGTTAGTTTACCTTCCATTTTGCTTGTCTAGTGTTTAATATTGTGATT[A/C]CGCTGCAGATACCAACGAGTTTCCGATACCGACGAGGAAATGACCAAGAG
682	TGGCTGCTTCATACATGAGAGAGCACAAACCCGACTTTCTCCCGTTTTT[A/C]TTGACAGAAACCGAGCCTGAGTCCACTGGCGGATCTGCAGAAGAGCGGTT
683	CAGTCACAAAAGTCTGAGACTAAAGCAGCTGGAGAAAACTCTGATTCTA[G/T]GGGTAGCCACACTCAGAAAGGAGGCCCATATGGGCAGATCATGACAGCTT
684	TGCTAGATACTCGTTTACCAGATTGCTTTCTCCTCTCGGCTTCTCTGAG[A/G]GCACATTTATCTGCAGCGGAGTGGTAATGTATAAGACGTCCCTTTGCTGT
685	TCGTCATGGGACTTAACATTGACTGCAGAGCTCACAACGGATGTCAAAT[G/A]ATCCCTTTCTGCTCCCATGTTCTCTGCAGCCTCAACACACTGAGCAGCCA
686	CGTGTTCGACCGTCCGATCCCGTTGCTCCGGGGGCCAATCTCCGCCGGT[G/A]GTTCGGGTCACGTTCTAGCCTTCCGATCCCTGGACTCATGGTCTGCAGCT
687	TTGTTTCTGAGCGAAGAAGAAGAAGACTGGACTCGATTAGAAGATGGGG[G/A]TGGATAACATTAGCTTATTCATTCTACTCTGTGTGACGCTGCACCATTGC
688	GCAGCCAACTCCGAAAAAAGATTCAGAGCGGGAGAGCGTGAACATTAAG[G/A]AACCTTCGCAGCCAAGACAGAAAAAGGATTCAGAGCGGGAGAGAGTGAAC
689	GAGATCAGAAACCTTCGCAGCCAACTCAGAAAAAGGATTCAGAGCGGGA[A/G]AGCGTGAACATTAAGAAACCTTCGCAGCCAACTCCGAAAAAAGATTCAGA
690	TGCTGGAAGGAGGTTCGCAAATGGAGTCGGAACTGGTGGTGTAGTAGAA[A/G]ACGTGGCTGGTGGTGCAGTGGCTAATGCAGCTGGTGATGGAGAAGCTAAT
691	TGACGCAGAAGAAGATGATGACGCCACACAAGATCCAAATGCAGATTAT[T/G]GAACTTCGAGTGGCTGCATCATCTTCTAGTATCATGGTACGTTGGTTTAT
692	TCAGTTCACTAATGAGGCAAATGTTGAGCTTCCAAACCAGGAGCATCCA[G/A]CACAAGCAAATGACGCAGAAGAAGATGATGACGCCACACAAGATCCAAAT
693	CAAACACAATAGGAAGAGGTCCAGCCCATGTAGGTGCAACGGCAGCAAT[A/G]GCTGATGGTTTTAGTAGTCCACGTTGAGTAGCACGGATTGCTAATGTCGC
694	AAAGCAAGATAGCCATTTCGGACTGCGACTAGAGGTGCGATCAGATTCT[A/G]CTTTGGGAGTTACTGATTTAGGAGCTTCCTCTTTCTTCAATCCATCATCT
695	CCAAAACTCCAGTAGAAAGATACCATGTCGATTGCGCTTTCATCGTCCT[C/T]CCCTTCATTATCTGATTCTTGAAAGGTATTGTTACCGTTGCAGCTTCTGT
696	AGAGTTTGAACTTCTTCAAAGGGATGCAGCAAAGAAAGATTTAGGAGAG[A/G]ACTCTCTTTGAAGTACAAATAACCAAAGGCAATCTCGGTCACCCGTCCAC
697	GCCATTGTATCCACTCTCTGGTAAAGAAGCCAAAGGCGTTAAGCTGCAA[A/C]TTCAGACTTCGCGTCCTTATAACATCGCACACAGAGGTTCCAATGGAGAG
698	ATACCATGTCGATTGCGCTTTCATCGTCCTTCCCTTCATTATCTGATTC[T/C]TGAAAGGTATTGTTACCGTTGCAGCTTCTGTTGGTTGGTTTTCCACATAG
699	CTAAGTAGCTTCGCGTATCAAAGGTGTTAAACTGTCTTCCCTGTGGAAT[T/G]ACTCCTGATAAGTTGTTGAATGAGACATTGAAGACAGCTAGGCTGCTCAG
700	GATCATCCAATTCACATCCAACTGCTATTTGACATAACCGCATTGTGTG[C/T]ACGCACAGTTTAACCTGCCCTGTAACCGACAAGTATATAAAACGCTAAAA
701	CTTGATCAACATGGCACCATCACTTGGTTCTTCTGGTTTCCCTTCCACG[G/A]CGCTCTCTATTGTCTTTGTAGCTGGTTCCGAAGAGCTGCTCATAAGCTTC
702	ATCGGTGAAGACAGGTATTACTCTACCTCTTATCTGTTTTCACACTTTT[T/C]GATAAATTCCAAGAGTTTGTTTTGAAAGGCCAATCTTAATGGTTCCTTTC
703	ATCAGAACGGATGCGATGCAAATCCATCTAGTAATGTCGAACCATGCTC[A/C]AATGCAGAAGCTAGTCCAGTAGAACCTCCTCCATTGCTTACTGCTGCTCA
704	TAAACCGGTGGTGGCTGCTCCGGTAGAGACCAAACCGGAGGAGAAAGAA[A/G]CGGTAACCACTGAGAAAGCCACCGCTGCTGAAGAAGATGGAACCAAGACG
705	ATAGATTTCATGCAGCTTTCTGTGCATTGATCATTCTTTTAACGTTCTT[G/T]TGGTACGGTTAACTTACGGCTTTATTAGTGTCTCTCTTCCTTTCCTCTGG
706	GATTTTGGTCGCGGTAGGAGGCGTAAATAAAAAACCTGGCTCGGGCTCT[C/T]CTGCAGATGTGCTAGGTCTTGGTAGCTATGCGTCTGATGATGATGATGCT
707	GAATCAAAGAAGAGTCAATTTACAAAAAACCCAAAAGAAACTAAAAAAG[G/C]TTGAATTTTTAGTATTGGATCTACCTCGATTAGAGCTGCGTTTGAAGGGT
708	ATGATGTCGTAGGGCGGTAATAATTTGCATGGTCCGAACAAAAATGTAA[T/A]AATCACGCAGCTTTGTGAAACACCTTATTCACAAAAATGATGAGTAATCA
709	GAGCCACATAGATGACATAAATTCTCTCTTTATAATGGCAGCCTGATCG[T/C]TGTAGTAGCCATGGTAAGAGCAATTTGAGAATGGCGATTATACACTGCCA
710	GATGTCGTAGGGCGGTAATAATTTGCATGGTCCGAACAAAAATGTAATA[G/A]TCACGCAGCTTTGTGAAACACCTTATTCACAAAAATGATGAGTAATCATA
711	AATTTCACAGAAGGCGCAATGTATTCGTTTCCACAAATAAAGTTACCAT[T/C]GAAAGCGATCCAAGCAGCTAAACAAGCCGGAAAAGTCCCTGATGTTTTCT
712	ATAGAGCCGTAGCTGCGTCTTTCTTCCCTCTGAGGCTACCGTTCTCAAG[A/C]AGATCCACTAAGGCCAGTATCGCACCCGATGCACCTATTATGATCTTGTT
713	CCTCTGACAATTCCTCATGTTGTTTTGATGTTGTAGGATTCAAAACATG[G/A]GTTTCTCCACAAGTTTCTTTGAGACCGTAGAGTCTAAGGTTGTCCAAGAA
714	CTGTTAAAAATAACTTCAAGTCTGCGACAACAACAAAACCCAAATCGAA[T/A]TAAGACATTGCAAATCACAACAACAAAACAAAAAATCGATAAATCTCATT
715	CAGGACCATACTCGAGGTCAACCATGATGAAATATTTTTCTGGATAGAG[T/A]AGCGATTTCCACCATTGTTGGAGACGTCGAGCTGCTTGGATTCAGGAAGT
716	TTTGATGATTGCTGCTTGAAACGCTTGATGTTTTGGTGTGAACCGGGAA[G/A]ATGTAATGTAAGAAGATATCGGATACAGAGAAGTCGCTGAAGAAGAACTA
717	TATGGGATTGATGAGAACATGGAACCATCCAAAGAGGACACCTGTTTGG[G/A]ATCGCCTGTTAGGTTTGCTGGTAAAGATAATGCCAGTACTTGCACTAGTG
718	ATTGCTTTGGACAAGTCTGCTTTTTAAGGAAGCATGGACTCTTTCTTAC[A/G]AAACATGTCTTTGTTTCCGATGCTGCTTCGAGTTGTACAATGACCGTGAA
719	AGCTGCGACGAATTGTGCAGTCTTGTCATCTGAATGACGAGCTGCAAGC[T/G]GGGAGAGCTGGGAGCCAGATCATATGAATGACGAGTTACGAGCTGGGAGA
720	AGTTGCTGCAAACAAACAGTGCATAACAATTCAATCTTTTTTAACTTTT[C/G]TTCTTTTATACTCTCATCTTCTCACTCTTCGTTCAATGTCTATTTTGTTA
721	CTTTCTCCGCCGCAGTTGAAAACCTAGCCGAGGCTAAACATTTCACCGC[C/T]GTAACAAATCTCCTCGACGGATTCATCGAGAATCGATCAGATCTGAAATC
722	TATCGGTATCAGGCTCCTTCGTCAAAAGACTATCAGCAGCTGATTCCGC[T/C]AATTTGAGCTCAGCAGTTGAAGTTATTGTGACCAAATCTCCGTCATTGTC
723	GAGCATGGGCTTTTCTTCGACCTTTTAATCGACTTATGTGGGCGGTCAC[G/A]GCTTGCTGCTTTCTTTTCGTTGGCATTGTTGTTTGGATCTTGGAGCACAG
724	AAGATATTGATTTAGTCTTGATGTGTACTTCCACTCCTGATGACCTATT[T/C]GGTGCTGCTCCACAGGTAATATTGACCCTTAGATATAAACTTCTCCTGGT
725	ATTACTGGCTTCTTCGGCTGCTGTAGATCCTAACGGTAAGCTCTAGATC[C/T]TCTATTGAAGTCAAAGTCTCAGACTTTCTCTTGTGAGAGAATAAAAGAAA
726	TGGCAGAGGTTGTTCCTGAAGATATTGATTTAGTCTTGATGTGTACTTC[T/C]ACTCCTGATGACCTATTTGGTGCTGCTCCACAGGTAATATTGACCCTTAG
727	GTGACTTCACAACCGCCATAAATCACTTCACAGAAGCAATCAACCTAAC[T/A]CCAACCAATCACGTCCTCTTCTCAAACCGTTCCGCTGCACACGCATCGTT
728	CCTTTCCTGTCTTTTTAGCTCGGTCAGTAGTGTATGCCTTGTCCGGACG[A/G]TCCTGGTTACGCAAGACATGAAAAACTTTCGAGGTACTAGCAGCAGCACT
729	GATCACTGCAGCAACTGTTATTCATTAAAAAAAAAAAGCAATTATAACA[A/G]CTAACCTAACGACTCGAACTGGATAACCCATTTTGCAGCTCAGTCGTAAT
730	TCAGCCAAACGATCACCCACAGCAGGAGCAGCTCGCCATAGGAATGTTT[G/T]AAGCTTAGGTGCTGTGTTTATTCCCCAAACATCACTCTGCCAATTCATGG
731	CATCCGAAATGCCTCTTTTGCAACGCCACTTTGGAAAGCCCTTGTTCTT[A/T]GTTTGTCCATACTCAGGAGCTGCTTGGACTATACTTAAGCTTTGGCGTGA
732	CTGCAGGAGTGCTTTTCCCGTCAACTCGGTTCAGGTTGCCTCCATGGAT[A/T]GCAGGTGCTGCAATGGCTGCTTCTTCTGTTAGTGTTGTGTGTTGCTCTCT
733	CAAAAGTTTTTAGTGGTATTGATGATAAAGACATTGTGGCTTGGTCAGC[T/C]ATGCTTGCAGGATATGCTCAGACCGGAGAGACAGAGGCAGCTATAAAGAT
734	CAATGGCAGAAGCAGCGTTCCTGAACTGGGTAATAAGGTCCTTGTTCTC[T/C]GATGGATCTCCATAGTTCTCAGACCATGTTGACATGATAACAGCCATACC
